# Supplementary material for: Markers and agencies of anisotropy in the Indus sign system
Source: Springer Nature journal article supplement (doi:10.1007/s43539-023-00102-3), 2024-03-01
Supplement: MOESM2 [file 43539_2023_102_MOESM2_ESM.pdf]

## ESM2. Simulations from F3 sequences and their correlation with M77/ICIT

In the tabulation below, Each F3 sequence is placed in a shaded row. Below a shaded row, there are white rows split in two columns. The number of white rows under a shaded row varies according to the number of discordances that an F3 sequence permits, and the results that each query produces. The simulated query string is placed in Column 1. Column 2 displays the results and labels the results by D type, or the error type E1 as the case may be. **E1** is a corpus error, a misprint in M77 or a serious disagreement between M77 and ICIT that cannot be verified with CISI.

A single frontal sign with no dorsal sign produces blank white rows in Table 2. Such rows need not be reproduced in Table 2, but they are, to make it convenient to cross-refer it with Table 1.

By design, the study goes after discordance, and reports it exhaustively. However, a concordance note is provided in Table 2 for every natural F3 sign string which produces concordance in M77 when it is numerically significant.

It is important to note that some D1/D2 labels in Table 2 are assigned on the basis that  $\overline{\text{r}}99$  infixes to  $\overline{\text{f}}342$  to create  $\overline{\text{f}}344$ . This may be true also of  $\overline{\text{r}}97$  and  $\overline{\text{f}}343$ , and  $\overline{\text{r}}102$  and  $\overline{\text{f}}345$ , and tentatively taken as such. The decision is justified under Section 5.4 of the article.

| Supplementary Catalogue ESM2. Correlation between F3 and M77, anisotropies by D type, and their markers                                                                                                                                        |                                                                                                                |
|------------------------------------------------------------------------------------------------------------------------------------------------------------------------------------------------------------------------------------------------|----------------------------------------------------------------------------------------------------------------|
| Simulation                                                                                                                                                                                                                                     | Anisotropy by D type and its marker                                                                            |
| 1  59. CISI: K-37. M77: - - - -. Symbol: Goat. Orientation: Right                                                                                           |                                                                                                                |
| a None                                                                                                                                                                                                                                         |                                                                                                                |
| 2  59. CISI K- 34. M77: - - - -. Symbol: Markhor. Orientation: Left                                                                                         |                                                                                                                |
| a None                                                                                                                                                                                                                                         |                                                                                                                |
| 3  59. CISI B-14. M77: - - - -. Symbol: Urus?. Orientation: Left                                                                                            |                                                                                                                |
| a None                                                                                                                                                                                                                                         |                                                                                                                |
| 4  59. CISI M-410. M77: 2133. Symbol: Gharial. Orientation: Left                                                                                            |                                                                                                                |
| a None                                                                                                                                                                                                                                         |                                                                                                                |
| 5  171. CISI B-11. M77: - - - -. Symbol: Markhor. Orientation: Right                                                                                        |                                                                                                                |
| a None                                                                                                                                                                                                                                         |                                                                                                                |
| 6 $\overline{\text{r}}99$  284<br>CISI M-272. M77: 2554. Symbol: Turning goat. Orientation: Left                                                            |                                                                                                                |
| a 284 after 99                                                                                                                                                                                                                                 | None.                                                                                                          |
| 7  162  109<br>CISI: M-1904. M77: 2565. Symbol: Goat. Orientation: Left. |                                                                                                                |
| a 109 after 162                                                                                                                                                                                                                                | None. 2658 (M-1365) LTR.  . |

| Supplementary Catalogue ESM2. Correlation between F3 and M77, anisotropies by D type, and their markers                                                                                                                                                                                                                                                                                                                                                                                                                                                                                        |                                                                                                                                                                                                                                                                                                                                                                                                                                                                                                                                                                                                                                                                                                                                                                                                                                                                                                                                                                                                                                                                                                                                                                                                                                                                                                                                                                                                                                                                                                                                                                                                                                                                                                                                                                                                                                                                                                                                                                                                                                                                                                                                                                                                                                                                                                                                                                                                                                                                                                                                                                                                                                                                                                                                                                                                                                                                                                                                                                                                                                                                                                                                                                                                                                                                                                                                                                                                                                                                                                                                                                                                                                                                                                                                                                                                                                                                                                                                                                                                                                                                                                                                                                                                                                                                                                                                                                                                                                                                                                                                                                                                                                                                                                                                                                                                                                                                                                                                                                                                                                                                                                                                                                                                                                                                                                                                                                                                                                                                                                                                                                                                                                                                                                                                                                                                                                                                                                                                                                                                                                                                                                                                                                                                                                                                                                                                                                                                                                                                                                                                                                                                                                                                                                                                                                                                                                                                                                                                                                                                                                                                                                                                                                                                                                                                                                                                                                                                                                                                                                                                                                                                                                                                                                                                                                                                                                                                                                                                                                                                                                                                                                                                                                                                                                                                                                                                                                                                                                                                                                                                                                                                                                                                                                                                                                                                                                                                                                                                                                                                                                                                                                                                                                                                                                                                                                                                                                                                                                                                                                                                                                                                                                                                                                                                                                                                                                                                                                                                                                                                                                                                                                                                                                                                                                                                                                                                                                                                                                                                                                                                                                                                                                                                                                                                                                                                                                                                                                                                                                                                                                                                                                                                                                                                                                                                                                                                                                                                                                                                                                                                                                                                                                                                                                                                                                                                                                                                                                                                                                                                                                                                                                                                                                                                                                                                                                                                                                                                                                                                                                                                                                                                                                                                                                                                                                                                                                                                                                                                                                                                                                                                                                                                                                                                                                                                                                                                                                                                                                                                                                                                                                                                                                                                                                                                                                                                                                                                                                                                                                                                                                                                                                                                                                                                                                                                                                                                                                                                                                                                                                                                                                                                                                                                                                                                                                                                                                                                                                                                                                                                                                                                                                                                                                                                                                                                                                                                                                                                                                                                                                                                                                                                                                                                                                                                                                                                                                                                                                                                                                                                                                                                                                                                                                                                                                                                                                                                                                                                                                                                                                                                                                                                                                                                                                                                                                                                                                                                                                                                                                                                                                                                                                                                                                                                                                                                                                                                                                                                                                                                                                                                                                                                                                                                                                                                                                                                                                                                                                                                                                                                                                                                                                                                                                                                                                                                                                                                                                                                                                                                                                                                                                                                                                                                                                                                                                                                                                                                                                                                                                                                                                                                                                                                                                                                                                                                                                                                                                                                                                                                                                                                                                                                                                                                                                                                                                                                                                                                                                                                                                                                                                                                                                                                                                                                                                                                                                                                                                                                                                                                                                                                                                                                                                                                                                                                                                                                                                                                                                                                                                                                                                                                                                                                                                                                                                                                                                                                                                                                                                                                                                                                                                                                                                                                                                                                                                                                                                                                                                                                                                                                                                                                                                                                                                                                                                                                                                                                                                                                                                                                                                                                                                                                                                                                                                                                                                                                                                                                                                                                                                                                                                                                                                                                                                                                                                                                                                                                                                                                                                                                                                                                                                                                                                                                                                                                                                                                                                                                                                                                                                                                                                                                                                                                                                                                                                                                                                                                                                                                                                                                                                                                                                                                                                                                                                                                                                                                                                                                                                                                                                                                                                                                                                                                                                                                                                                                                                                                                                                                                                                                                                                                                                                                                                                                                                                                                                                                                                                                                                                                                                                                                                                                                                                                                                                                                                                                                                                                                                                                                                                                                                                                                                                                                                                                                                                                                                                                                                                                                                                                                                                                                                                                                                                                                                                                                                                                                                                                                                                                                                                                                                                                                                                                                                                                                                                                                                                                                                                                                                                                                                                                                                                                                                                                                                                                                                                                                                                                                                                                                                                                                                                                                                                                                                                                                                                                                                                                                                                                                                                                                                                                                                                                                                                                                                                                                                                                                                                                                                                                                                                                                                                                                                                                                                                                                                                                                                                                                                                                                                                                                                                                                                                                                                                                                                                                                                                                                                                                                                                                                                                                                                                                                                                                                                                                                                                                                                                                                                                                                                                                                                                     |
|------------------------------------------------------------------------------------------------------------------------------------------------------------------------------------------------------------------------------------------------------------------------------------------------------------------------------------------------------------------------------------------------------------------------------------------------------------------------------------------------------------------------------------------------------------------------------------------------|-------------------------------------------------------------------------------------------------------------------------------------------------------------------------------------------------------------------------------------------------------------------------------------------------------------------------------------------------------------------------------------------------------------------------------------------------------------------------------------------------------------------------------------------------------------------------------------------------------------------------------------------------------------------------------------------------------------------------------------------------------------------------------------------------------------------------------------------------------------------------------------------------------------------------------------------------------------------------------------------------------------------------------------------------------------------------------------------------------------------------------------------------------------------------------------------------------------------------------------------------------------------------------------------------------------------------------------------------------------------------------------------------------------------------------------------------------------------------------------------------------------------------------------------------------------------------------------------------------------------------------------------------------------------------------------------------------------------------------------------------------------------------------------------------------------------------------------------------------------------------------------------------------------------------------------------------------------------------------------------------------------------------------------------------------------------------------------------------------------------------------------------------------------------------------------------------------------------------------------------------------------------------------------------------------------------------------------------------------------------------------------------------------------------------------------------------------------------------------------------------------------------------------------------------------------------------------------------------------------------------------------------------------------------------------------------------------------------------------------------------------------------------------------------------------------------------------------------------------------------------------------------------------------------------------------------------------------------------------------------------------------------------------------------------------------------------------------------------------------------------------------------------------------------------------------------------------------------------------------------------------------------------------------------------------------------------------------------------------------------------------------------------------------------------------------------------------------------------------------------------------------------------------------------------------------------------------------------------------------------------------------------------------------------------------------------------------------------------------------------------------------------------------------------------------------------------------------------------------------------------------------------------------------------------------------------------------------------------------------------------------------------------------------------------------------------------------------------------------------------------------------------------------------------------------------------------------------------------------------------------------------------------------------------------------------------------------------------------------------------------------------------------------------------------------------------------------------------------------------------------------------------------------------------------------------------------------------------------------------------------------------------------------------------------------------------------------------------------------------------------------------------------------------------------------------------------------------------------------------------------------------------------------------------------------------------------------------------------------------------------------------------------------------------------------------------------------------------------------------------------------------------------------------------------------------------------------------------------------------------------------------------------------------------------------------------------------------------------------------------------------------------------------------------------------------------------------------------------------------------------------------------------------------------------------------------------------------------------------------------------------------------------------------------------------------------------------------------------------------------------------------------------------------------------------------------------------------------------------------------------------------------------------------------------------------------------------------------------------------------------------------------------------------------------------------------------------------------------------------------------------------------------------------------------------------------------------------------------------------------------------------------------------------------------------------------------------------------------------------------------------------------------------------------------------------------------------------------------------------------------------------------------------------------------------------------------------------------------------------------------------------------------------------------------------------------------------------------------------------------------------------------------------------------------------------------------------------------------------------------------------------------------------------------------------------------------------------------------------------------------------------------------------------------------------------------------------------------------------------------------------------------------------------------------------------------------------------------------------------------------------------------------------------------------------------------------------------------------------------------------------------------------------------------------------------------------------------------------------------------------------------------------------------------------------------------------------------------------------------------------------------------------------------------------------------------------------------------------------------------------------------------------------------------------------------------------------------------------------------------------------------------------------------------------------------------------------------------------------------------------------------------------------------------------------------------------------------------------------------------------------------------------------------------------------------------------------------------------------------------------------------------------------------------------------------------------------------------------------------------------------------------------------------------------------------------------------------------------------------------------------------------------------------------------------------------------------------------------------------------------------------------------------------------------------------------------------------------------------------------------------------------------------------------------------------------------------------------------------------------------------------------------------------------------------------------------------------------------------------------------------------------------------------------------------------------------------------------------------------------------------------------------------------------------------------------------------------------------------------------------------------------------------------------------------------------------------------------------------------------------------------------------------------------------------------------------------------------------------------------------------------------------------------------------------------------------------------------------------------------------------------------------------------------------------------------------------------------------------------------------------------------------------------------------------------------------------------------------------------------------------------------------------------------------------------------------------------------------------------------------------------------------------------------------------------------------------------------------------------------------------------------------------------------------------------------------------------------------------------------------------------------------------------------------------------------------------------------------------------------------------------------------------------------------------------------------------------------------------------------------------------------------------------------------------------------------------------------------------------------------------------------------------------------------------------------------------------------------------------------------------------------------------------------------------------------------------------------------------------------------------------------------------------------------------------------------------------------------------------------------------------------------------------------------------------------------------------------------------------------------------------------------------------------------------------------------------------------------------------------------------------------------------------------------------------------------------------------------------------------------------------------------------------------------------------------------------------------------------------------------------------------------------------------------------------------------------------------------------------------------------------------------------------------------------------------------------------------------------------------------------------------------------------------------------------------------------------------------------------------------------------------------------------------------------------------------------------------------------------------------------------------------------------------------------------------------------------------------------------------------------------------------------------------------------------------------------------------------------------------------------------------------------------------------------------------------------------------------------------------------------------------------------------------------------------------------------------------------------------------------------------------------------------------------------------------------------------------------------------------------------------------------------------------------------------------------------------------------------------------------------------------------------------------------------------------------------------------------------------------------------------------------------------------------------------------------------------------------------------------------------------------------------------------------------------------------------------------------------------------------------------------------------------------------------------------------------------------------------------------------------------------------------------------------------------------------------------------------------------------------------------------------------------------------------------------------------------------------------------------------------------------------------------------------------------------------------------------------------------------------------------------------------------------------------------------------------------------------------------------------------------------------------------------------------------------------------------------------------------------------------------------------------------------------------------------------------------------------------------------------------------------------------------------------------------------------------------------------------------------------------------------------------------------------------------------------------------------------------------------------------------------------------------------------------------------------------------------------------------------------------------------------------------------------------------------------------------------------------------------------------------------------------------------------------------------------------------------------------------------------------------------------------------------------------------------------------------------------------------------------------------------------------------------------------------------------------------------------------------------------------------------------------------------------------------------------------------------------------------------------------------------------------------------------------------------------------------------------------------------------------------------------------------------------------------------------------------------------------------------------------------------------------------------------------------------------------------------------------------------------------------------------------------------------------------------------------------------------------------------------------------------------------------------------------------------------------------------------------------------------------------------------------------------------------------------------------------------------------------------------------------------------------------------------------------------------------------------------------------------------------------------------------------------------------------------------------------------------------------------------------------------------------------------------------------------------------------------------------------------------------------------------------------------------------------------------------------------------------------------------------------------------------------------------------------------------------------------------------------------------------------------------------------------------------------------------------------------------------------------------------------------------------------------------------------------------------------------------------------------------------------------------------------------------------------------------------------------------------------------------------------------------------------------------------------------------------------------------------------------------------------------------------------------------------------------------------------------------------------------------------------------------------------------------------------------------------------------------------------------------------------------------------------------------------------------------------------------------------------------------------------------------------------------------------------------------------------------------------------------------------------------------------------------------------------------------------------------------------------------------------------------------------------------------------------------------------------------------------------------------------------------------------------------------------------------------------------------------------------------------------------------------------------------------------------------------------------------------------------------------------------------------------------------------------------------------------------------------------------------------------------------------------------------------------------------------------------------------------------------------------------------------------------------------------------------------------------------------------------------------------------------------------------------------------------------------------------------------------------------------------------------------------------------------------------------------------------------------------------------------------------------------------------------------------------------------------------------------------------------------------------------------------------------------------------------------------------------------------------------------------------------------------------------------------------------------------------------------------------------------------------------------------------------------------------------------------------------------------------------------------------------------------------------------------------------------------------------------------------------------------------------------------------------------------------------------------------------------------------------------------------------------------------------------------------------------------------------------------------------------------------------------------------------------------------------------------------------------------------------------------------------------------------------------------------------------------------------------------------------------------------------------------------------------------------------------------------------------------------------------------------------------------------------------------------------------------------------------------------------------------------------------------------------------------------------------------------------------------------------------------------------------------------------------------------------------------------------------------------------------------------------------------------------------------------------------------------------------------------------------------------------------------------------------------------------------------------------------------------------------------------------------------------------------------------------------------------------------------------------------------------------------------------------------------------------------------------------------------------------------------------------------------------------------------------------------------------------------------------------------------------------------------------------------------------------------------------------------------------------------------------------------------------------------------------------------------------------------------------------------------------------------------------------------------------------------------------------------------------------------------------------------------------------------------------------------------------------------------------------------------------------------------------------------------------------------------------------------------------------------------------------------------------------------------------------------------------------------------------------------------------------------------------------------------------------------------------------------------------------------------------------------------------------------------------------------------------------------------------------------------------------------------------------------------------------------------------------------------------------------------------------------------------------------------------------------------------------------------------------------------------------------------------------------------------------------------------------------------------------------------------------------------------------------------------------------------------------------------------------------------------------------------------------------------------------------------------------------------------------------------------------------------------------------------------------------------------------------------------------------------------------------------------------------------------------------------------------------------------------------------------------------------------------------------------------------------------------------------------------------------------------------------------------------------------------------------------------------------------------------------------------------------------------------------------------------------------------------------------------------------------------------------------------------------------------------------------------------------------------------------------------------------------------------------------------------------------------------------------------------------------------------------------------------------------------------------------------------------------------------------------------------------------------------------------------------------------------------------------------------------------------------------------------------------------------------------------------------------------------------------------------------------------------------------------------------------------------------------------------------------------------------------------------------------------------------------------------------------------------------------------------------------------------------------------------------------------------------------------------------------------------------------------------------------------------------------------------------------------------------------------------------------------------------------------------------------------------------------------------------------------------------------------------------------------------------------------------------------------------------------------------------------------------------------------------------------------------------------------------------------------------------------------------------------------------------------------------------------------------------------------------------------------------------------------------------------------------------------------------------------------------------------------------------------------------------------------------------------------------------------------------------------------------------------------------------------------------------------------------------------------------------------------------------------------------------------------------------------------------------------------------------------------------------------------------------------------------------------------------------------------------------------------------------------------------------------------------------------------------------------------------------------------------------------------------------------------------------------------------------------------------------------------------------------------------------------------------------------------------------------------------------------------------------------------------------------------------------------------------------------------------------------------------------------------------------------------------------------------------------------------------------------------------------------------------------------------------------------------------------------------------------------------------------------------------------------------------------------------------------------------------------------------------------------------------------------------------------------------------------------------------------------------------------------------------------------------------------------------------------------------------------------------------------------------------------------------------------------------------------------------------------------------------------------------------------------------------------------------------------------------------------------------------------------------------------------------------------------------------------------------------------------------------------------------------------------------------------------------------------------------------------------------------------------------------------------------------------------------------------------------------------------------------------------------------------------------------------------------------------------------------------------------------------------------------------------------------------------------------------------------------------------------------------------------------------------------------------------------------------------------------------------------------------------------------------------------------------------------------------------------------------------------------------------------------------------------------------------------------------------------------------------------------------------------------------------------------------------------------------------------------------------------------------------------------------------------------------------------------------------------------------------------------------------------------------------------------------------------------------------------------------------------------------------------------------------------------------------------------------------------------------------------------------------------------------------------------------------------------------------------------------------------------------------------------------------------------------------------------------------------------------------------------------------------------------------------------------------------------------------------------------------------------------------------------------------------------------------------------------------------------------------------------------------------------------------------------------------------------------------------------------------------------------------------------------------------------------------------------------------------------------------------------------------------------------------------------------------------------------------------------------------------------------------------------------------------------------------------------------------------------------------------------------------------------------------------------------------------------------------------------------------------------------------------------------------------------------------------------------------------------------------------------------------------------------------------------------------------------------------------------------------------------------------------------------------------------------------------------------------------------------------------------------------------------------------------------------------------------------------------------------------------------------------------------------------------------------------------------------------------------------------------------------------------------------------------------------------------------------------------------------------------------------------------------------------------------------------------------------------------------------------------------------------------------------------------------------------------------------------------------------------------------------------------------------------------------------------------------------------------------------------------------------------------------------------------------------------------------------------------------------------------------------------------------------------------------------------------------------------------------------------------------------------------------------------------------------------------------------------------------------------------------------------------------------------------------------------------------------------------------------------------------------------------------------------------------------------------|
| Simulation                                                                                                                                                                                                                                                                                                                                                                                                                                                                                                                                                                                     | Anisotropy by D type and its marker                                                                                                                                                                                                                                                                                                                                                                                                                                                                                                                                                                                                                                                                                                                                                                                                                                                                                                                                                                                                                                                                                                                                                                                                                                                                                                                                                                                                                                                                                                                                                                                                                                                                                                                                                                                                                                                                                                                                                                                                                                                                                                                                                                                                                                                                                                                                                                                                                                                                                                                                                                                                                                                                                                                                                                                                                                                                                                                                                                                                                                                                                                                                                                                                                                                                                                                                                                                                                                                                                                                                                                                                                                                                                                                                                                                                                                                                                                                                                                                                                                                                                                                                                                                                                                                                                                                                                                                                                                                                                                                                                                                                                                                                                                                                                                                                                                                                                                                                                                                                                                                                                                                                                                                                                                                                                                                                                                                                                                                                                                                                                                                                                                                                                                                                                                                                                                                                                                                                                                                                                                                                                                                                                                                                                                                                                                                                                                                                                                                                                                                                                                                                                                                                                                                                                                                                                                                                                                                                                                                                                                                                                                                                                                                                                                                                                                                                                                                                                                                                                                                                                                                                                                                                                                                                                                                                                                                                                                                                                                                                                                                                                                                                                                                                                                                                                                                                                                                                                                                                                                                                                                                                                                                                                                                                                                                                                                                                                                                                                                                                                                                                                                                                                                                                                                                                                                                                                                                                                                                                                                                                                                                                                                                                                                                                                                                                                                                                                                                                                                                                                                                                                                                                                                                                                                                                                                                                                                                                                                                                                                                                                                                                                                                                                                                                                                                                                                                                                                                                                                                                                                                                                                                                                                                                                                                                                                                                                                                                                                                                                                                                                                                                                                                                                                                                                                                                                                                                                                                                                                                                                                                                                                                                                                                                                                                                                                                                                                                                                                                                                                                                                                                                                                                                                                                                                                                                                                                                                                                                                                                                                                                                                                                                                                                                                                                                                                                                                                                                                                                                                                                                                                                                                                                                                                                                                                                                                                                                                                                                                                                                                                                                                                                                                                                                                                                                                                                                                                                                                                                                                                                                                                                                                                                                                                                                                                                                                                                                                                                                                                                                                                                                                                                                                                                                                                                                                                                                                                                                                                                                                                                                                                                                                                                                                                                                                                                                                                                                                                                                                                                                                                                                                                                                                                                                                                                                                                                                                                                                                                                                                                                                                                                                                                                                                                                                                                                                                                                                                                                                                                                                                                                                                                                                                                                                                                                                                                                                                                                                                                                                                                                                                                                                                                                                                                                                                                                                                                                                                                                                                                                                                                                                                                                                                                                                                                                                                                                                                                                                                                                                                                                                                                                                                                                                                                                                                                                                                                                                                                                                                                                                                                                                                                                                                                                                                                                                                                                                                                                                                                                                                                                                                                                                                                                                                                                                                                                                                                                                                                                                                                                                                                                                                                                                                                                                                                                                                                                                                                                                                                                                                                                                                                                                                                                                                                                                                                                                                                                                                                                                                                                                                                                                                                                                                                                                                                                                                                                                                                                                                                                                                                                                                                                                                                                                                                                                                                                                                                                                                                                                                                                                                                                                                                                                                                                                                                                                                                                                                                                                                                                                                                                                                                                                                                                                                                                                                                                                                                                                                                                                                                                                                                                                                                                                                                                                                                                                                                                                                                                                                                                                                                                                                                                                                                                                                                                                                                                                                                                                                                                                                                                                                                                                                                                                                                                                                                                                                                                                                                                                                                                                                                                                                                                                                                                                                                                                                                                                                                                                                                                                                                                                                                                                                                                                                                                                                                                                                                                                                                                                                                                                                                                                                                                                                                                                                                                                                                                                                                                                                                                                                                                                                                                                                                                                                                                                                                                                                                                                                                                                                                                                                                                                                                                                                                                                                                                                                                                                                                                                                                                                                                                                                                                                                                                                                                                                                                                                                                                                                                                                                                                                                                                                                                                                                                                                                                                                                                                                                                                                                                                                                                                                                                                                                                                                                                                                                                                                                                                                                                                                                                                                                                                                                                                                                                                                                                                                                                                                                                                                                                                                                                                                                                                                                                                                                                                                                                                                                                                                                                                                                                                                                                                                                                                                                                                                                                                                                                                                                                                                                                                                                                                                                                                                                                                                                                                                                                                                                                                                                                                                                                                                                                                                                                                                                                                                                                                                                                                                                                                                                                                                                 |
| 8<br> 162  110<br>CISI: B-10. M77: 9204. Symbol: Markhor. Orientation: Left                                                                                                                                                                                                                                                                                                                                                  |                                                                                                                                                                                                                                                                                                                                                                                                                                                                                                                                                                                                                                                                                                                                                                                                                                                                                                                                                                                                                                                                                                                                                                                                                                                                                                                                                                                                                                                                                                                                                                                                                                                                                                                                                                                                                                                                                                                                                                                                                                                                                                                                                                                                                                                                                                                                                                                                                                                                                                                                                                                                                                                                                                                                                                                                                                                                                                                                                                                                                                                                                                                                                                                                                                                                                                                                                                                                                                                                                                                                                                                                                                                                                                                                                                                                                                                                                                                                                                                                                                                                                                                                                                                                                                                                                                                                                                                                                                                                                                                                                                                                                                                                                                                                                                                                                                                                                                                                                                                                                                                                                                                                                                                                                                                                                                                                                                                                                                                                                                                                                                                                                                                                                                                                                                                                                                                                                                                                                                                                                                                                                                                                                                                                                                                                                                                                                                                                                                                                                                                                                                                                                                                                                                                                                                                                                                                                                                                                                                                                                                                                                                                                                                                                                                                                                                                                                                                                                                                                                                                                                                                                                                                                                                                                                                                                                                                                                                                                                                                                                                                                                                                                                                                                                                                                                                                                                                                                                                                                                                                                                                                                                                                                                                                                                                                                                                                                                                                                                                                                                                                                                                                                                                                                                                                                                                                                                                                                                                                                                                                                                                                                                                                                                                                                                                                                                                                                                                                                                                                                                                                                                                                                                                                                                                                                                                                                                                                                                                                                                                                                                                                                                                                                                                                                                                                                                                                                                                                                                                                                                                                                                                                                                                                                                                                                                                                                                                                                                                                                                                                                                                                                                                                                                                                                                                                                                                                                                                                                                                                                                                                                                                                                                                                                                                                                                                                                                                                                                                                                                                                                                                                                                                                                                                                                                                                                                                                                                                                                                                                                                                                                                                                                                                                                                                                                                                                                                                                                                                                                                                                                                                                                                                                                                                                                                                                                                                                                                                                                                                                                                                                                                                                                                                                                                                                                                                                                                                                                                                                                                                                                                                                                                                                                                                                                                                                                                                                                                                                                                                                                                                                                                                                                                                                                                                                                                                                                                                                                                                                                                                                                                                                                                                                                                                                                                                                                                                                                                                                                                                                                                                                                                                                                                                                                                                                                                                                                                                                                                                                                                                                                                                                                                                                                                                                                                                                                                                                                                                                                                                                                                                                                                                                                                                                                                                                                                                                                                                                                                                                                                                                                                                                                                                                                                                                                                                                                                                                                                                                                                                                                                                                                                                                                                                                                                                                                                                                                                                                                                                                                                                                                                                                                                                                                                                                                                                                                                                                                                                                                                                                                                                                                                                                                                                                                                                                                                                                                                                                                                                                                                                                                                                                                                                                                                                                                                                                                                                                                                                                                                                                                                                                                                                                                                                                                                                                                                                                                                                                                                                                                                                                                                                                                                                                                                                                                                                                                                                                                                                                                                                                                                                                                                                                                                                                                                                                                                                                                                                                                                                                                                                                                                                                                                                                                                                                                                                                                                                                                                                                                                                                                                                                                                                                                                                                                                                                                                                                                                                                                                                                                                                                                                                                                                                                                                                                                                                                                                                                                                                                                                                                                                                                                                                                                                                                                                                                                                                                                                                                                                                                                                                                                                                                                                                                                                                                                                                                                                                                                                                                                                                                                                                                                                                                                                                                                                                                                                                                                                                                                                                                                                                                                                                                                                                                                                                                                                                                                                                                                                                                                                                                                                                                                                                                                                                                                                                                                                                                                                                                                                                                                                                                                                                                                                                                                                                                                                                                                                                                                                                                                                                                                                                                                                                                                                                                                                                                                                                                                                                                                                                                                                                                                                                                                                                                                                                                                                                                                                                                                                                                                                                                                                                                                                                                                                                                                                                                                                                                                                                                                                                                                                                                                                                                                                                                                                                                                                                                                                                                                                                                                                                                                                                                                                                                                                                                                                                                                                                                                                                                                                                                                                                                                                                                                                                                                                                                                                                                                                                                                                                                                                                                                                                                                                                                                                                                                                                                                                                                                                                                                                                                                                                                                                                                                                                                                                                                                                                                                                                                                                                                                                                                                                                                                                                                                                                                                                                                                                                                                                                                                                                                                                                                                                                                                                                                                                                                                                                                                                                                                                                                                                                                     |
| a                                                                                                                                                                                                                                                                                                                                                                                                                                                                                                                                                                                              | 110 after 162      None.                                                                                                                                                                                                                                                                                                                                                                                                                                                                                                                                                                                                                                                                                                                                                                                                                                                                                                                                                                                                                                                                                                                                                                                                                                                                                                                                                                                                                                                                                                                                                                                                                                                                                                                                                                                                                                                                                                                                                                                                                                                                                                                                                                                                                                                                                                                                                                                                                                                                                                                                                                                                                                                                                                                                                                                                                                                                                                                                                                                                                                                                                                                                                                                                                                                                                                                                                                                                                                                                                                                                                                                                                                                                                                                                                                                                                                                                                                                                                                                                                                                                                                                                                                                                                                                                                                                                                                                                                                                                                                                                                                                                                                                                                                                                                                                                                                                                                                                                                                                                                                                                                                                                                                                                                                                                                                                                                                                                                                                                                                                                                                                                                                                                                                                                                                                                                                                                                                                                                                                                                                                                                                                                                                                                                                                                                                                                                                                                                                                                                                                                                                                                                                                                                                                                                                                                                                                                                                                                                                                                                                                                                                                                                                                                                                                                                                                                                                                                                                                                                                                                                                                                                                                                                                                                                                                                                                                                                                                                                                                                                                                                                                                                                                                                                                                                                                                                                                                                                                                                                                                                                                                                                                                                                                                                                                                                                                                                                                                                                                                                                                                                                                                                                                                                                                                                                                                                                                                                                                                                                                                                                                                                                                                                                                                                                                                                                                                                                                                                                                                                                                                                                                                                                                                                                                                                                                                                                                                                                                                                                                                                                                                                                                                                                                                                                                                                                                                                                                                                                                                                                                                                                                                                                                                                                                                                                                                                                                                                                                                                                                                                                                                                                                                                                                                                                                                                                                                                                                                                                                                                                                                                                                                                                                                                                                                                                                                                                                                                                                                                                                                                                                                                                                                                                                                                                                                                                                                                                                                                                                                                                                                                                                                                                                                                                                                                                                                                                                                                                                                                                                                                                                                                                                                                                                                                                                                                                                                                                                                                                                                                                                                                                                                                                                                                                                                                                                                                                                                                                                                                                                                                                                                                                                                                                                                                                                                                                                                                                                                                                                                                                                                                                                                                                                                                                                                                                                                                                                                                                                                                                                                                                                                                                                                                                                                                                                                                                                                                                                                                                                                                                                                                                                                                                                                                                                                                                                                                                                                                                                                                                                                                                                                                                                                                                                                                                                                                                                                                                                                                                                                                                                                                                                                                                                                                                                                                                                                                                                                                                                                                                                                                                                                                                                                                                                                                                                                                                                                                                                                                                                                                                                                                                                                                                                                                                                                                                                                                                                                                                                                                                                                                                                                                                                                                                                                                                                                                                                                                                                                                                                                                                                                                                                                                                                                                                                                                                                                                                                                                                                                                                                                                                                                                                                                                                                                                                                                                                                                                                                                                                                                                                                                                                                                                                                                                                                                                                                                                                                                                                                                                                                                                                                                                                                                                                                                                                                                                                                                                                                                                                                                                                                                                                                                                                                                                                                                                                                                                                                                                                                                                                                                                                                                                                                                                                                                                                                                                                                                                                                                                                                                                                                                                                                                                                                                                                                                                                                                                                                                                                                                                                                                                                                                                                                                                                                                                                                                                                                                                                                                                                                                                                                                                                                                                                                                                                                                                                                                                                                                                                                                                                                                                                                                                                                                                                                                                                                                                                                                                                                                                                                                                                                                                                                                                                                                                                                                                                                                                                                                                                                                                                                                                                                                                                                                                                                                                                                                                                                                                                                                                                                                                                                                                                                                                                                                                                                                                                                                                                                                                                                                                                                                                                                                                                                                                                                                                                                                                                                                                                                                                                                                                                                                                                                                                                                                                                                                                                                                                                                                                                                                                                                                                                                                                                                                                                                                                                                                                                                                                                                                                                                                                                                                                                                                                                                                                                                                                                                                                                                                                                                                                                                                                                                                                                                                                                                                                                                                                                                                                                                                                                                                                                                                                                                                                                                                                                                                                                                                                                                                                                                                                                                                                                                                                                                                                                                                                                                                                                                                                                                                                                                                                                                                                                                                                                                                                                                                                                                                                                                                                                                                                                                                                                                                                                                                                                                                                                                                                                                                                                                                                                                                                                                                                                                                                                                                                                                                                                                                                                                                                                                                                                                                                                                                                                                                                                                                                                                                                                                                                                                                                                            |
| 9<br> 112?  167? (ICIT 411)<br>CISI: B-12. M77: - - - -. Symbol: Goat. Orientation: Left.                                                                                                                                                                                                                                                                                                                                    |                                                                                                                                                                                                                                                                                                                                                                                                                                                                                                                                                                                                                                                                                                                                                                                                                                                                                                                                                                                                                                                                                                                                                                                                                                                                                                                                                                                                                                                                                                                                                                                                                                                                                                                                                                                                                                                                                                                                                                                                                                                                                                                                                                                                                                                                                                                                                                                                                                                                                                                                                                                                                                                                                                                                                                                                                                                                                                                                                                                                                                                                                                                                                                                                                                                                                                                                                                                                                                                                                                                                                                                                                                                                                                                                                                                                                                                                                                                                                                                                                                                                                                                                                                                                                                                                                                                                                                                                                                                                                                                                                                                                                                                                                                                                                                                                                                                                                                                                                                                                                                                                                                                                                                                                                                                                                                                                                                                                                                                                                                                                                                                                                                                                                                                                                                                                                                                                                                                                                                                                                                                                                                                                                                                                                                                                                                                                                                                                                                                                                                                                                                                                                                                                                                                                                                                                                                                                                                                                                                                                                                                                                                                                                                                                                                                                                                                                                                                                                                                                                                                                                                                                                                                                                                                                                                                                                                                                                                                                                                                                                                                                                                                                                                                                                                                                                                                                                                                                                                                                                                                                                                                                                                                                                                                                                                                                                                                                                                                                                                                                                                                                                                                                                                                                                                                                                                                                                                                                                                                                                                                                                                                                                                                                                                                                                                                                                                                                                                                                                                                                                                                                                                                                                                                                                                                                                                                                                                                                                                                                                                                                                                                                                                                                                                                                                                                                                                                                                                                                                                                                                                                                                                                                                                                                                                                                                                                                                                                                                                                                                                                                                                                                                                                                                                                                                                                                                                                                                                                                                                                                                                                                                                                                                                                                                                                                                                                                                                                                                                                                                                                                                                                                                                                                                                                                                                                                                                                                                                                                                                                                                                                                                                                                                                                                                                                                                                                                                                                                                                                                                                                                                                                                                                                                                                                                                                                                                                                                                                                                                                                                                                                                                                                                                                                                                                                                                                                                                                                                                                                                                                                                                                                                                                                                                                                                                                                                                                                                                                                                                                                                                                                                                                                                                                                                                                                                                                                                                                                                                                                                                                                                                                                                                                                                                                                                                                                                                                                                                                                                                                                                                                                                                                                                                                                                                                                                                                                                                                                                                                                                                                                                                                                                                                                                                                                                                                                                                                                                                                                                                                                                                                                                                                                                                                                                                                                                                                                                                                                                                                                                                                                                                                                                                                                                                                                                                                                                                                                                                                                                                                                                                                                                                                                                                                                                                                                                                                                                                                                                                                                                                                                                                                                                                                                                                                                                                                                                                                                                                                                                                                                                                                                                                                                                                                                                                                                                                                                                                                                                                                                                                                                                                                                                                                                                                                                                                                                                                                                                                                                                                                                                                                                                                                                                                                                                                                                                                                                                                                                                                                                                                                                                                                                                                                                                                                                                                                                                                                                                                                                                                                                                                                                                                                                                                                                                                                                                                                                                                                                                                                                                                                                                                                                                                                                                                                                                                                                                                                                                                                                                                                                                                                                                                                                                                                                                                                                                                                                                                                                                                                                                                                                                                                                                                                                                                                                                                                                                                                                                                                                                                                                                                                                                                                                                                                                                                                                                                                                                                                                                                                                                                                                                                                                                                                                                                                                                                                                                                                                                                                                                                                                                                                                                                                                                                                                                                                                                                                                                                                                                                                                                                                                                                                                                                                                                                                                                                                                                                                                                                                                                                                                                                                                                                                                                                                                                                                                                                                                                                                                                                                                                                                                                                                                                                                                                                                                                                                                                                                                                                                                                                                                                                                                                                                                                                                                                                                                                                                                                                                                                                                                                                                                                                                                                                                                                                                                                                                                                                                                                                                                                                                                                                                                                                                                                                                                                                                                                                                                                                                                                                                                                                                                                                                                                                                                                                                                                                                                                                                                                                                                                                                                                                                                                                                                                                                                                                                                                                                                                                                                                                                                                                                                                                                                                                                                                                                                                                                                                                                                                                                                                                                                                                                                                                                                                                                                                                                                                                                                                                                                                                                                                                                                                                                                                                                                                                                                                                                                                                                                                                                                                                                                                                                                                                                                                                                                                                                                                                                                                                                                                                                                                                                                                                                                                                                                                                                                                                                                                                                                                                                                                                                                     |
| a                                                                                                                                                                                                                                                                                                                                                                                                                                                                                                                                                                                              | 167 after 112      None                                                                                                                                                                                                                                                                                                                                                                                                                                                                                                                                                                                                                                                                                                                                                                                                                                                                                                                                                                                                                                                                                                                                                                                                                                                                                                                                                                                                                                                                                                                                                                                                                                                                                                                                                                                                                                                                                                                                                                                                                                                                                                                                                                                                                                                                                                                                                                                                                                                                                                                                                                                                                                                                                                                                                                                                                                                                                                                                                                                                                                                                                                                                                                                                                                                                                                                                                                                                                                                                                                                                                                                                                                                                                                                                                                                                                                                                                                                                                                                                                                                                                                                                                                                                                                                                                                                                                                                                                                                                                                                                                                                                                                                                                                                                                                                                                                                                                                                                                                                                                                                                                                                                                                                                                                                                                                                                                                                                                                                                                                                                                                                                                                                                                                                                                                                                                                                                                                                                                                                                                                                                                                                                                                                                                                                                                                                                                                                                                                                                                                                                                                                                                                                                                                                                                                                                                                                                                                                                                                                                                                                                                                                                                                                                                                                                                                                                                                                                                                                                                                                                                                                                                                                                                                                                                                                                                                                                                                                                                                                                                                                                                                                                                                                                                                                                                                                                                                                                                                                                                                                                                                                                                                                                                                                                                                                                                                                                                                                                                                                                                                                                                                                                                                                                                                                                                                                                                                                                                                                                                                                                                                                                                                                                                                                                                                                                                                                                                                                                                                                                                                                                                                                                                                                                                                                                                                                                                                                                                                                                                                                                                                                                                                                                                                                                                                                                                                                                                                                                                                                                                                                                                                                                                                                                                                                                                                                                                                                                                                                                                                                                                                                                                                                                                                                                                                                                                                                                                                                                                                                                                                                                                                                                                                                                                                                                                                                                                                                                                                                                                                                                                                                                                                                                                                                                                                                                                                                                                                                                                                                                                                                                                                                                                                                                                                                                                                                                                                                                                                                                                                                                                                                                                                                                                                                                                                                                                                                                                                                                                                                                                                                                                                                                                                                                                                                                                                                                                                                                                                                                                                                                                                                                                                                                                                                                                                                                                                                                                                                                                                                                                                                                                                                                                                                                                                                                                                                                                                                                                                                                                                                                                                                                                                                                                                                                                                                                                                                                                                                                                                                                                                                                                                                                                                                                                                                                                                                                                                                                                                                                                                                                                                                                                                                                                                                                                                                                                                                                                                                                                                                                                                                                                                                                                                                                                                                                                                                                                                                                                                                                                                                                                                                                                                                                                                                                                                                                                                                                                                                                                                                                                                                                                                                                                                                                                                                                                                                                                                                                                                                                                                                                                                                                                                                                                                                                                                                                                                                                                                                                                                                                                                                                                                                                                                                                                                                                                                                                                                                                                                                                                                                                                                                                                                                                                                                                                                                                                                                                                                                                                                                                                                                                                                                                                                                                                                                                                                                                                                                                                                                                                                                                                                                                                                                                                                                                                                                                                                                                                                                                                                                                                                                                                                                                                                                                                                                                                                                                                                                                                                                                                                                                                                                                                                                                                                                                                                                                                                                                                                                                                                                                                                                                                                                                                                                                                                                                                                                                                                                                                                                                                                                                                                                                                                                                                                                                                                                                                                                                                                                                                                                                                                                                                                                                                                                                                                                                                                                                                                                                                                                                                                                                                                                                                                                                                                                                                                                                                                                                                                                                                                                                                                                                                                                                                                                                                                                                                                                                                                                                                                                                                                                                                                                                                                                                                                                                                                                                                                                                                                                                                                                                                                                                                                                                                                                                                                                                                                                                                                                                                                                                                                                                                                                                                                                                                                                                                                                                                                                                                                                                                                                                                                                                                                                                                                                                                                                                                                                                                                                                                                                                                                                                                                                                                                                                                                                                                                                                                                                                                                                                                                                                                                                                                                                                                                                                                                                                                                                                                                                                                                                                                                                                                                                                                                                                                                                                                                                                                                                                                                                                                                                                                                                                                                                                                                                                                                                                                                                                                                                                                                                                                                                                                                                                                                                                                                                                                                                                                                                                                                                                                                                                                                                                                                                                                                                                                                                                                                                                                                                                                                                                                                                                                                                                                                                                                                                                                                                                                                                                                                                                                                                                                                                                                                                                                                                                                                                                                                                                                                                                                                                                                                                                                                                                                                                                                                                                                                                                                                                                                                                                                             |
| 10<br> 211 ?<br>CISI: M-1905. M77: 2516. Symbol: Goat. Orientation: Right.                                                                                                                                                                                                                                                                                                                                                                                                                                    |                                                                                                                                                                                                                                                                                                                                                                                                                                                                                                                                                                                                                                                                                                                                                                                                                                                                                                                                                                                                                                                                                                                                                                                                                                                                                                                                                                                                                                                                                                                                                                                                                                                                                                                                                                                                                                                                                                                                                                                                                                                                                                                                                                                                                                                                                                                                                                                                                                                                                                                                                                                                                                                                                                                                                                                                                                                                                                                                                                                                                                                                                                                                                                                                                                                                                                                                                                                                                                                                                                                                                                                                                                                                                                                                                                                                                                                                                                                                                                                                                                                                                                                                                                                                                                                                                                                                                                                                                                                                                                                                                                                                                                                                                                                                                                                                                                                                                                                                                                                                                                                                                                                                                                                                                                                                                                                                                                                                                                                                                                                                                                                                                                                                                                                                                                                                                                                                                                                                                                                                                                                                                                                                                                                                                                                                                                                                                                                                                                                                                                                                                                                                                                                                                                                                                                                                                                                                                                                                                                                                                                                                                                                                                                                                                                                                                                                                                                                                                                                                                                                                                                                                                                                                                                                                                                                                                                                                                                                                                                                                                                                                                                                                                                                                                                                                                                                                                                                                                                                                                                                                                                                                                                                                                                                                                                                                                                                                                                                                                                                                                                                                                                                                                                                                                                                                                                                                                                                                                                                                                                                                                                                                                                                                                                                                                                                                                                                                                                                                                                                                                                                                                                                                                                                                                                                                                                                                                                                                                                                                                                                                                                                                                                                                                                                                                                                                                                                                                                                                                                                                                                                                                                                                                                                                                                                                                                                                                                                                                                                                                                                                                                                                                                                                                                                                                                                                                                                                                                                                                                                                                                                                                                                                                                                                                                                                                                                                                                                                                                                                                                                                                                                                                                                                                                                                                                                                                                                                                                                                                                                                                                                                                                                                                                                                                                                                                                                                                                                                                                                                                                                                                                                                                                                                                                                                                                                                                                                                                                                                                                                                                                                                                                                                                                                                                                                                                                                                                                                                                                                                                                                                                                                                                                                                                                                                                                                                                                                                                                                                                                                                                                                                                                                                                                                                                                                                                                                                                                                                                                                                                                                                                                                                                                                                                                                                                                                                                                                                                                                                                                                                                                                                                                                                                                                                                                                                                                                                                                                                                                                                                                                                                                                                                                                                                                                                                                                                                                                                                                                                                                                                                                                                                                                                                                                                                                                                                                                                                                                                                                                                                                                                                                                                                                                                                                                                                                                                                                                                                                                                                                                                                                                                                                                                                                                                                                                                                                                                                                                                                                                                                                                                                                                                                                                                                                                                                                                                                                                                                                                                                                                                                                                                                                                                                                                                                                                                                                                                                                                                                                                                                                                                                                                                                                                                                                                                                                                                                                                                                                                                                                                                                                                                                                                                                                                                                                                                                                                                                                                                                                                                                                                                                                                                                                                                                                                                                                                                                                                                                                                                                                                                                                                                                                                                                                                                                                                                                                                                                                                                                                                                                                                                                                                                                                                                                                                                                                                                                                                                                                                                                                                                                                                                                                                                                                                                                                                                                                                                                                                                                                                                                                                                                                                                                                                                                                                                                                                                                                                                                                                                                                                                                                                                                                                                                                                                                                                                                                                                                                                                                                                                                                                                                                                                                                                                                                                                                                                                                                                                                                                                                                                                                                                                                                                                                                                                                                                                                                                                                                                                                                                                                                                                                                                                                                                                                                                                                                                                                                                                                                                                                                                                                                                                                                                                                                                                                                                                                                                                                                                                                                                                                                                                                                                                                                                                                                                                                                                                                                                                                                                                                                                                                                                                                                                                                                                                                                                                                                                                                                                                                                                                                                                                                                                                                                                                                                                                                                                                                                                                                                                                                                                                                                                                                                                                                                                                                                                                                                                                                                                                                                                                                                                                                                                                                                                                                                                                                                                                                                                                                                                                                                                                                                                                                                                                                                                                                                                                                                                                                                                                                                                                                                                                                                                                                                                                                                                                                                                                                                                                                                                                                                                                                                                                                                                                                                                                                                                                                                                                                                                                                                                                                                                                                                                                                                                                                                                                                                                                                                                                                                                                                                                                                                                                                                                                                                                                                                                                                                                                                                                                                                                                                                                                                                                                                                                                                                                                                                                                                                                                                                                                                                                     |
| a                                                                                                                                                                                                                                                                                                                                                                                                                                                                                                                                                                                              | None                                                                                                                                                                                                                                                                                                                                                                                                                                                                                                                                                                                                                                                                                                                                                                                                                                                                                                                                                                                                                                                                                                                                                                                                                                                                                                                                                                                                                                                                                                                                                                                                                                                                                                                                                                                                                                                                                                                                                                                                                                                                                                                                                                                                                                                                                                                                                                                                                                                                                                                                                                                                                                                                                                                                                                                                                                                                                                                                                                                                                                                                                                                                                                                                                                                                                                                                                                                                                                                                                                                                                                                                                                                                                                                                                                                                                                                                                                                                                                                                                                                                                                                                                                                                                                                                                                                                                                                                                                                                                                                                                                                                                                                                                                                                                                                                                                                                                                                                                                                                                                                                                                                                                                                                                                                                                                                                                                                                                                                                                                                                                                                                                                                                                                                                                                                                                                                                                                                                                                                                                                                                                                                                                                                                                                                                                                                                                                                                                                                                                                                                                                                                                                                                                                                                                                                                                                                                                                                                                                                                                                                                                                                                                                                                                                                                                                                                                                                                                                                                                                                                                                                                                                                                                                                                                                                                                                                                                                                                                                                                                                                                                                                                                                                                                                                                                                                                                                                                                                                                                                                                                                                                                                                                                                                                                                                                                                                                                                                                                                                                                                                                                                                                                                                                                                                                                                                                                                                                                                                                                                                                                                                                                                                                                                                                                                                                                                                                                                                                                                                                                                                                                                                                                                                                                                                                                                                                                                                                                                                                                                                                                                                                                                                                                                                                                                                                                                                                                                                                                                                                                                                                                                                                                                                                                                                                                                                                                                                                                                                                                                                                                                                                                                                                                                                                                                                                                                                                                                                                                                                                                                                                                                                                                                                                                                                                                                                                                                                                                                                                                                                                                                                                                                                                                                                                                                                                                                                                                                                                                                                                                                                                                                                                                                                                                                                                                                                                                                                                                                                                                                                                                                                                                                                                                                                                                                                                                                                                                                                                                                                                                                                                                                                                                                                                                                                                                                                                                                                                                                                                                                                                                                                                                                                                                                                                                                                                                                                                                                                                                                                                                                                                                                                                                                                                                                                                                                                                                                                                                                                                                                                                                                                                                                                                                                                                                                                                                                                                                                                                                                                                                                                                                                                                                                                                                                                                                                                                                                                                                                                                                                                                                                                                                                                                                                                                                                                                                                                                                                                                                                                                                                                                                                                                                                                                                                                                                                                                                                                                                                                                                                                                                                                                                                                                                                                                                                                                                                                                                                                                                                                                                                                                                                                                                                                                                                                                                                                                                                                                                                                                                                                                                                                                                                                                                                                                                                                                                                                                                                                                                                                                                                                                                                                                                                                                                                                                                                                                                                                                                                                                                                                                                                                                                                                                                                                                                                                                                                                                                                                                                                                                                                                                                                                                                                                                                                                                                                                                                                                                                                                                                                                                                                                                                                                                                                                                                                                                                                                                                                                                                                                                                                                                                                                                                                                                                                                                                                                                                                                                                                                                                                                                                                                                                                                                                                                                                                                                                                                                                                                                                                                                                                                                                                                                                                                                                                                                                                                                                                                                                                                                                                                                                                                                                                                                                                                                                                                                                                                                                                                                                                                                                                                                                                                                                                                                                                                                                                                                                                                                                                                                                                                                                                                                                                                                                                                                                                                                                                                                                                                                                                                                                                                                                                                                                                                                                                                                                                                                                                                                                                                                                                                                                                                                                                                                                                                                                                                                                                                                                                                                                                                                                                                                                                                                                                                                                                                                                                                                                                                                                                                                                                                                                                                                                                                                                                                                                                                                                                                                                                                                                                                                                                                                                                                                                                                                                                                                                                                                                                                                                                                                                                                                                                                                                                                                                                                                                                                                                                                                                                                                                                                                                                                                                                                                                                                                                                                                                                                                                                                                                                                                                                                                                                                                                                                                                                                                                                                                                                                                                                                                                                                                                                                                                                                                                                                                                                                                                                                                                                                                                                                                                                                                                                                                                                                                                                                                                                                                                                                                                                                                                                                                                                                                                                                                                                                                                                                                                                                                                                                                                                                                                                                                                                                                                                                                                                                                                                                                                                                                                                                                                                                                                                                                                                                                                                                                                                                                                                                                                                                                                                                                                                                                                                                                                                                                                                                                                                                                                                                                                                                                                                                |
| 11<br> 211  171<br>CISI: Blk-5. M77: - - - -. Symbol: Urus. Orientation: Left                                                                                                                                                                                                                                                                                                                                                |                                                                                                                                                                                                                                                                                                                                                                                                                                                                                                                                                                                                                                                                                                                                                                                                                                                                                                                                                                                                                                                                                                                                                                                                                                                                                                                                                                                                                                                                                                                                                                                                                                                                                                                                                                                                                                                                                                                                                                                                                                                                                                                                                                                                                                                                                                                                                                                                                                                                                                                                                                                                                                                                                                                                                                                                                                                                                                                                                                                                                                                                                                                                                                                                                                                                                                                                                                                                                                                                                                                                                                                                                                                                                                                                                                                                                                                                                                                                                                                                                                                                                                                                                                                                                                                                                                                                                                                                                                                                                                                                                                                                                                                                                                                                                                                                                                                                                                                                                                                                                                                                                                                                                                                                                                                                                                                                                                                                                                                                                                                                                                                                                                                                                                                                                                                                                                                                                                                                                                                                                                                                                                                                                                                                                                                                                                                                                                                                                                                                                                                                                                                                                                                                                                                                                                                                                                                                                                                                                                                                                                                                                                                                                                                                                                                                                                                                                                                                                                                                                                                                                                                                                                                                                                                                                                                                                                                                                                                                                                                                                                                                                                                                                                                                                                                                                                                                                                                                                                                                                                                                                                                                                                                                                                                                                                                                                                                                                                                                                                                                                                                                                                                                                                                                                                                                                                                                                                                                                                                                                                                                                                                                                                                                                                                                                                                                                                                                                                                                                                                                                                                                                                                                                                                                                                                                                                                                                                                                                                                                                                                                                                                                                                                                                                                                                                                                                                                                                                                                                                                                                                                                                                                                                                                                                                                                                                                                                                                                                                                                                                                                                                                                                                                                                                                                                                                                                                                                                                                                                                                                                                                                                                                                                                                                                                                                                                                                                                                                                                                                                                                                                                                                                                                                                                                                                                                                                                                                                                                                                                                                                                                                                                                                                                                                                                                                                                                                                                                                                                                                                                                                                                                                                                                                                                                                                                                                                                                                                                                                                                                                                                                                                                                                                                                                                                                                                                                                                                                                                                                                                                                                                                                                                                                                                                                                                                                                                                                                                                                                                                                                                                                                                                                                                                                                                                                                                                                                                                                                                                                                                                                                                                                                                                                                                                                                                                                                                                                                                                                                                                                                                                                                                                                                                                                                                                                                                                                                                                                                                                                                                                                                                                                                                                                                                                                                                                                                                                                                                                                                                                                                                                                                                                                                                                                                                                                                                                                                                                                                                                                                                                                                                                                                                                                                                                                                                                                                                                                                                                                                                                                                                                                                                                                                                                                                                                                                                                                                                                                                                                                                                                                                                                                                                                                                                                                                                                                                                                                                                                                                                                                                                                                                                                                                                                                                                                                                                                                                                                                                                                                                                                                                                                                                                                                                                                                                                                                                                                                                                                                                                                                                                                                                                                                                                                                                                                                                                                                                                                                                                                                                                                                                                                                                                                                                                                                                                                                                                                                                                                                                                                                                                                                                                                                                                                                                                                                                                                                                                                                                                                                                                                                                                                                                                                                                                                                                                                                                                                                                                                                                                                                                                                                                                                                                                                                                                                                                                                                                                                                                                                                                                                                                                                                                                                                                                                                                                                                                                                                                                                                                                                                                                                                                                                                                                                                                                                                                                                                                                                                                                                                                                                                                                                                                                                                                                                                                                                                                                                                                                                                                                                                                                                                                                                                                                                                                                                                                                                                                                                                                                                                                                                                                                                                                                                                                                                                                                                                                                                                                                                                                                                                                                                                                                                                                                                                                                                                                                                                                                                                                                                                                                                                                                                                                                                                                                                                                                                                                                                                                                                                                                                                                                                                                                                                                                                                                                                                                                                                                                                                                                                                                                                                                                                                                                                                                                                                                                                                                                                                                                                                                                                                                                                                                                                                                                                                                                                                                                                                                                                                                                                                                                                                                                                                                                                                                                                                                                                                                                                                                                                                                                                                                                                                                                                                                                                                                                                                                                                                                                                                                                                                                                                                                                                                                                                                                                                                                                                                                                                                                                                                                                                                                                                                                                                                                                                                                                                                                                                                                                                                                                                                                                                                                                                                                                                                                                                                                                                                                                                                                                                                                                                                                                                                                                                                                                                                                                                                                                                                                                                                                                                                                                                                                                                                                                                                                                                                                                                                                                                                                                                                                                                                     |
| a                                                                                                                                                                                                                                                                                                                                                                                                                                                                                                                                                                                              | 171 after 211      None.                                                                                                                                                                                                                                                                                                                                                                                                                                                                                                                                                                                                                                                                                                                                                                                                                                                                                                                                                                                                                                                                                                                                                                                                                                                                                                                                                                                                                                                                                                                                                                                                                                                                                                                                                                                                                                                                                                                                                                                                                                                                                                                                                                                                                                                                                                                                                                                                                                                                                                                                                                                                                                                                                                                                                                                                                                                                                                                                                                                                                                                                                                                                                                                                                                                                                                                                                                                                                                                                                                                                                                                                                                                                                                                                                                                                                                                                                                                                                                                                                                                                                                                                                                                                                                                                                                                                                                                                                                                                                                                                                                                                                                                                                                                                                                                                                                                                                                                                                                                                                                                                                                                                                                                                                                                                                                                                                                                                                                                                                                                                                                                                                                                                                                                                                                                                                                                                                                                                                                                                                                                                                                                                                                                                                                                                                                                                                                                                                                                                                                                                                                                                                                                                                                                                                                                                                                                                                                                                                                                                                                                                                                                                                                                                                                                                                                                                                                                                                                                                                                                                                                                                                                                                                                                                                                                                                                                                                                                                                                                                                                                                                                                                                                                                                                                                                                                                                                                                                                                                                                                                                                                                                                                                                                                                                                                                                                                                                                                                                                                                                                                                                                                                                                                                                                                                                                                                                                                                                                                                                                                                                                                                                                                                                                                                                                                                                                                                                                                                                                                                                                                                                                                                                                                                                                                                                                                                                                                                                                                                                                                                                                                                                                                                                                                                                                                                                                                                                                                                                                                                                                                                                                                                                                                                                                                                                                                                                                                                                                                                                                                                                                                                                                                                                                                                                                                                                                                                                                                                                                                                                                                                                                                                                                                                                                                                                                                                                                                                                                                                                                                                                                                                                                                                                                                                                                                                                                                                                                                                                                                                                                                                                                                                                                                                                                                                                                                                                                                                                                                                                                                                                                                                                                                                                                                                                                                                                                                                                                                                                                                                                                                                                                                                                                                                                                                                                                                                                                                                                                                                                                                                                                                                                                                                                                                                                                                                                                                                                                                                                                                                                                                                                                                                                                                                                                                                                                                                                                                                                                                                                                                                                                                                                                                                                                                                                                                                                                                                                                                                                                                                                                                                                                                                                                                                                                                                                                                                                                                                                                                                                                                                                                                                                                                                                                                                                                                                                                                                                                                                                                                                                                                                                                                                                                                                                                                                                                                                                                                                                                                                                                                                                                                                                                                                                                                                                                                                                                                                                                                                                                                                                                                                                                                                                                                                                                                                                                                                                                                                                                                                                                                                                                                                                                                                                                                                                                                                                                                                                                                                                                                                                                                                                                                                                                                                                                                                                                                                                                                                                                                                                                                                                                                                                                                                                                                                                                                                                                                                                                                                                                                                                                                                                                                                                                                                                                                                                                                                                                                                                                                                                                                                                                                                                                                                                                                                                                                                                                                                                                                                                                                                                                                                                                                                                                                                                                                                                                                                                                                                                                                                                                                                                                                                                                                                                                                                                                                                                                                                                                                                                                                                                                                                                                                                                                                                                                                                                                                                                                                                                                                                                                                                                                                                                                                                                                                                                                                                                                                                                                                                                                                                                                                                                                                                                                                                                                                                                                                                                                                                                                                                                                                                                                                                                                                                                                                                                                                                                                                                                                                                                                                                                                                                                                                                                                                                                                                                                                                                                                                                                                                                                                                                                                                                                                                                                                                                                                                                                                                                                                                                                                                                                                                                                                                                                                                                                                                                                                                                                                                                                                                                                                                                                                                                                                                                                                                                                                                                                                                                                                                                                                                                                                                                                                                                                                                                                                                                                                                                                                                                                                                                                                                                                                                                                                                                                                                                                                                                                                                                                                                                                                                                                                                                                                                                                                                                                                                                                                                                                                                                                                                                                                                                                                                                                                                                                                                                                                                                                                                                                                                                                                                                                                                                                                                                                                                                                                                                                                                                                                                                                                                                                                                                                                                                                                                                                                                                                                                                                                                                                                                                                                                                                                                                                                                                                                                                                                                                                                                                                                                                                                                                                                                                                                                                                                                                                                                                                                                                                                                                                                                                                                                                                                                                                                                                                                                                                                                                                                                                                                                                                                                                                                                                                                                                                                                                                                                                                                                                                                                                                                                                                            |
| 12<br> 342  326<br>CISI: K-26. M77: 8071. Symbol: Unicorn. Orientation: Left                                                                                                                                                                                                                                                                                                                                                 |                                                                                                                                                                                                                                                                                                                                                                                                                                                                                                                                                                                                                                                                                                                                                                                                                                                                                                                                                                                                                                                                                                                                                                                                                                                                                                                                                                                                                                                                                                                                                                                                                                                                                                                                                                                                                                                                                                                                                                                                                                                                                                                                                                                                                                                                                                                                                                                                                                                                                                                                                                                                                                                                                                                                                                                                                                                                                                                                                                                                                                                                                                                                                                                                                                                                                                                                                                                                                                                                                                                                                                                                                                                                                                                                                                                                                                                                                                                                                                                                                                                                                                                                                                                                                                                                                                                                                                                                                                                                                                                                                                                                                                                                                                                                                                                                                                                                                                                                                                                                                                                                                                                                                                                                                                                                                                                                                                                                                                                                                                                                                                                                                                                                                                                                                                                                                                                                                                                                                                                                                                                                                                                                                                                                                                                                                                                                                                                                                                                                                                                                                                                                                                                                                                                                                                                                                                                                                                                                                                                                                                                                                                                                                                                                                                                                                                                                                                                                                                                                                                                                                                                                                                                                                                                                                                                                                                                                                                                                                                                                                                                                                                                                                                                                                                                                                                                                                                                                                                                                                                                                                                                                                                                                                                                                                                                                                                                                                                                                                                                                                                                                                                                                                                                                                                                                                                                                                                                                                                                                                                                                                                                                                                                                                                                                                                                                                                                                                                                                                                                                                                                                                                                                                                                                                                                                                                                                                                                                                                                                                                                                                                                                                                                                                                                                                                                                                                                                                                                                                                                                                                                                                                                                                                                                                                                                                                                                                                                                                                                                                                                                                                                                                                                                                                                                                                                                                                                                                                                                                                                                                                                                                                                                                                                                                                                                                                                                                                                                                                                                                                                                                                                                                                                                                                                                                                                                                                                                                                                                                                                                                                                                                                                                                                                                                                                                                                                                                                                                                                                                                                                                                                                                                                                                                                                                                                                                                                                                                                                                                                                                                                                                                                                                                                                                                                                                                                                                                                                                                                                                                                                                                                                                                                                                                                                                                                                                                                                                                                                                                                                                                                                                                                                                                                                                                                                                                                                                                                                                                                                                                                                                                                                                                                                                                                                                                                                                                                                                                                                                                                                                                                                                                                                                                                                                                                                                                                                                                                                                                                                                                                                                                                                                                                                                                                                                                                                                                                                                                                                                                                                                                                                                                                                                                                                                                                                                                                                                                                                                                                                                                                                                                                                                                                                                                                                                                                                                                                                                                                                                                                                                                                                                                                                                                                                                                                                                                                                                                                                                                                                                                                                                                                                                                                                                                                                                                                                                                                                                                                                                                                                                                                                                                                                                                                                                                                                                                                                                                                                                                                                                                                                                                                                                                                                                                                                                                                                                                                                                                                                                                                                                                                                                                                                                                                                                                                                                                                                                                                                                                                                                                                                                                                                                                                                                                                                                                                                                                                                                                                                                                                                                                                                                                                                                                                                                                                                                                                                                                                                                                                                                                                                                                                                                                                                                                                                                                                                                                                                                                                                                                                                                                                                                                                                                                                                                                                                                                                                                                                                                                                                                                                                                                                                                                                                                                                                                                                                                                                                                                                                                                                                                                                                                                                                                                                                                                                                                                                                                                                                                                                                                                                                                                                                                                                                                                                                                                                                                                                                                                                                                                                                                                                                                                                                                                                                                                                                                                                                                                                                                                                                                                                                                                                                                                                                                                                                                                                                                                                                                                                                                                                                                                                                                                                                                                                                                                                                                                                                                                                                                                                                                                                                                                                                                                                                                                                                                                                                                                                                                                                                                                                                                                                                                                                                                                                                                                                                                                                                                                                                                                                                                                                                                                                                                                                                                                                                                                                                                                                                                                                                                                                                                                                                                                                                                                                                                                                                                                                                                                                                                                                                                                                                                                                                                                                                                                                                                                                                                                                                                                                                                                                                                                                                                                                                                                                                                                                                                                                                                                                                                                                                                                                                                                                                                                                                                                                                                                                                                                                                                                                                                                                                                                                                                                                                                                                                                                                                                                                                                                                                                                                                                                                                                                                                                                                                                                                                                                                                                                                                                                                                                                                                                                                                                                                                                                                                                                                                                                                                                                                                                                                                                                                                                                                                                                                                                                                                                                                                                                                                                                                                                                                                     |
| a                                                                                                                                                                                                                                                                                                                                                                                                                                                                                                                                                                                              | 326 after 342      None.                                                                                                                                                                                                                                                                                                                                                                                                                                                                                                                                                                                                                                                                                                                                                                                                                                                                                                                                                                                                                                                                                                                                                                                                                                                                                                                                                                                                                                                                                                                                                                                                                                                                                                                                                                                                                                                                                                                                                                                                                                                                                                                                                                                                                                                                                                                                                                                                                                                                                                                                                                                                                                                                                                                                                                                                                                                                                                                                                                                                                                                                                                                                                                                                                                                                                                                                                                                                                                                                                                                                                                                                                                                                                                                                                                                                                                                                                                                                                                                                                                                                                                                                                                                                                                                                                                                                                                                                                                                                                                                                                                                                                                                                                                                                                                                                                                                                                                                                                                                                                                                                                                                                                                                                                                                                                                                                                                                                                                                                                                                                                                                                                                                                                                                                                                                                                                                                                                                                                                                                                                                                                                                                                                                                                                                                                                                                                                                                                                                                                                                                                                                                                                                                                                                                                                                                                                                                                                                                                                                                                                                                                                                                                                                                                                                                                                                                                                                                                                                                                                                                                                                                                                                                                                                                                                                                                                                                                                                                                                                                                                                                                                                                                                                                                                                                                                                                                                                                                                                                                                                                                                                                                                                                                                                                                                                                                                                                                                                                                                                                                                                                                                                                                                                                                                                                                                                                                                                                                                                                                                                                                                                                                                                                                                                                                                                                                                                                                                                                                                                                                                                                                                                                                                                                                                                                                                                                                                                                                                                                                                                                                                                                                                                                                                                                                                                                                                                                                                                                                                                                                                                                                                                                                                                                                                                                                                                                                                                                                                                                                                                                                                                                                                                                                                                                                                                                                                                                                                                                                                                                                                                                                                                                                                                                                                                                                                                                                                                                                                                                                                                                                                                                                                                                                                                                                                                                                                                                                                                                                                                                                                                                                                                                                                                                                                                                                                                                                                                                                                                                                                                                                                                                                                                                                                                                                                                                                                                                                                                                                                                                                                                                                                                                                                                                                                                                                                                                                                                                                                                                                                                                                                                                                                                                                                                                                                                                                                                                                                                                                                                                                                                                                                                                                                                                                                                                                                                                                                                                                                                                                                                                                                                                                                                                                                                                                                                                                                                                                                                                                                                                                                                                                                                                                                                                                                                                                                                                                                                                                                                                                                                                                                                                                                                                                                                                                                                                                                                                                                                                                                                                                                                                                                                                                                                                                                                                                                                                                                                                                                                                                                                                                                                                                                                                                                                                                                                                                                                                                                                                                                                                                                                                                                                                                                                                                                                                                                                                                                                                                                                                                                                                                                                                                                                                                                                                                                                                                                                                                                                                                                                                                                                                                                                                                                                                                                                                                                                                                                                                                                                                                                                                                                                                                                                                                                                                                                                                                                                                                                                                                                                                                                                                                                                                                                                                                                                                                                                                                                                                                                                                                                                                                                                                                                                                                                                                                                                                                                                                                                                                                                                                                                                                                                                                                                                                                                                                                                                                                                                                                                                                                                                                                                                                                                                                                                                                                                                                                                                                                                                                                                                                                                                                                                                                                                                                                                                                                                                                                                                                                                                                                                                                                                                                                                                                                                                                                                                                                                                                                                                                                                                                                                                                                                                                                                                                                                                                                                                                                                                                                                                                                                                                                                                                                                                                                                                                                                                                                                                                                                                                                                                                                                                                                                                                                                                                                                                                                                                                                                                                                                                                                                                                                                                                                                                                                                                                                                                                                                                                                                                                                                                                                                                                                                                                                                                                                                                                                                                                                                                                                                                                                                                                                                                                                                                                                                                                                                                                                                                                                                                                                                                                                                                                                                                                                                                                                                                                                                                                                                                                                                                                                                                                                                                                                                                                                                                                                                                                                                                                                                                                                                                                                                                                                                                                                                                                                                                                                                                                                                                                                                                                                                                                                                                                                                                                                                                                                                                                                                                                                                                                                                                                                                                                                                                                                                                                                                                                                                                                                                                                                                                                                                                                                                                                                                                                                                                                                                                                                                                                                                                                                                                                                                                                                                                                                                                                                                                                                                                                                                                                                                                                                                                                                                                                                                                                                                                                                                                                                                                                                                                                                                                                                                                                                                                                                                                                                                                                                                                                                                                                                                                                                                                                                                                                                                                                                                                                                                                                                                                                                                                                                            |
| 13<br> 162  342  336<br>CISI: M-223. M77: 1167. Symbol: Unicorn. Orientation: Right. Note: The direction of reading is noted as LTR in both M77 and ICIT. M77 deals with  162 as a stand-alone. ICIT lists it as a proxy sign for the cult object. |                                                                                                                                                                                                                                                                                                                                                                                                                                                                                                                                                                                                                                                                                                                                                                                                                                                                                                                                                                                                                                                                                                                                                                                                                                                                                                                                                                                                                                                                                                                                                                                                                                                                                                                                                                                                                                                                                                                                                                                                                                                                                                                                                                                                                                                                                                                                                                                                                                                                                                                                                                                                                                                                                                                                                                                                                                                                                                                                                                                                                                                                                                                                                                                                                                                                                                                                                                                                                                                                                                                                                                                                                                                                                                                                                                                                                                                                                                                                                                                                                                                                                                                                                                                                                                                                                                                                                                                                                                                                                                                                                                                                                                                                                                                                                                                                                                                                                                                                                                                                                                                                                                                                                                                                                                                                                                                                                                                                                                                                                                                                                                                                                                                                                                                                                                                                                                                                                                                                                                                                                                                                                                                                                                                                                                                                                                                                                                                                                                                                                                                                                                                                                                                                                                                                                                                                                                                                                                                                                                                                                                                                                                                                                                                                                                                                                                                                                                                                                                                                                                                                                                                                                                                                                                                                                                                                                                                                                                                                                                                                                                                                                                                                                                                                                                                                                                                                                                                                                                                                                                                                                                                                                                                                                                                                                                                                                                                                                                                                                                                                                                                                                                                                                                                                                                                                                                                                                                                                                                                                                                                                                                                                                                                                                                                                                                                                                                                                                                                                                                                                                                                                                                                                                                                                                                                                                                                                                                                                                                                                                                                                                                                                                                                                                                                                                                                                                                                                                                                                                                                                                                                                                                                                                                                                                                                                                                                                                                                                                                                                                                                                                                                                                                                                                                                                                                                                                                                                                                                                                                                                                                                                                                                                                                                                                                                                                                                                                                                                                                                                                                                                                                                                                                                                                                                                                                                                                                                                                                                                                                                                                                                                                                                                                                                                                                                                                                                                                                                                                                                                                                                                                                                                                                                                                                                                                                                                                                                                                                                                                                                                                                                                                                                                                                                                                                                                                                                                                                                                                                                                                                                                                                                                                                                                                                                                                                                                                                                                                                                                                                                                                                                                                                                                                                                                                                                                                                                                                                                                                                                                                                                                                                                                                                                                                                                                                                                                                                                                                                                                                                                                                                                                                                                                                                                                                                                                                                                                                                                                                                                                                                                                                                                                                                                                                                                                                                                                                                                                                                                                                                                                                                                                                                                                                                                                                                                                                                                                                                                                                                                                                                                                                                                                                                                                                                                                                                                                                                                                                                                                                                                                                                                                                                                                                                                                                                                                                                                                                                                                                                                                                                                                                                                                                                                                                                                                                                                                                                                                                                                                                                                                                                                                                                                                                                                                                                                                                                                                                                                                                                                                                                                                                                                                                                                                                                                                                                                                                                                                                                                                                                                                                                                                                                                                                                                                                                                                                                                                                                                                                                                                                                                                                                                                                                                                                                                                                                                                                                                                                                                                                                                                                                                                                                                                                                                                                                                                                                                                                                                                                                                                                                                                                                                                                                                                                                                                                                                                                                                                                                                                                                                                                                                                                                                                                                                                                                                                                                                                                                                                                                                                                                                                                                                                                                                                                                                                                                                                                                                                                                                                                                                                                                                                                                                                                                                                                                                                                                                                                                                                                                                                                                                                                                                                                                                                                                                                                                                                                                                                                                                                                                                                                                                                                                                                                                                                                                                                                                                                                                                                                                                                                                                                                                                                                                                                                                                                                                                                                                                                                                                                                                                                                                                                                                                                                                                                                                                                                                                                                                                                                                                                                                                                                                                                                                                                                                                                                                                                                                                                                                                                                                                                                                                                                                                                                                                                                                                                                                                                                                                                                                                                                                                                                                                                                                                                                                                                                                                                                                                                                                                                                                                                                                                                                                                                                                                                                                                                                                                                                                                                                                                                                                                                                                                                                                                                                                                                                                                                                                                                                                                                                                                                                                                                                                                                                                                                                                                                                                                                                                                                                                                                                                                                                                                                                                                                                                                                                                                                                                                                                                                                                                                                                                                                                                                                                                                                                                                                                                                                                                                                                                                                                                                                                                                                                                                                                                                                                                                                                                                                                                                                                                                                                                                                                                                                                                                                                                                                                                                                                                                                                                                                                                                                                                                                                                                                                                                                                                                                                                                                                                                                                                                     |
| a                                                                                                                                                                                                                                                                                                                                                                                                                                                                                                                                                                                              | 336 after 162      D1 (1): 4718 (H-369)                                                                                                                                                                                                                                                                                                                                                         |

| Supplementary Catalogue ESM2. Correlation between F3 and M77, anisotropies by D type, and their markers |                                     |
|---------------------------------------------------------------------------------------------------------|-------------------------------------|
| Simulation                                                                                              | Anisotropy by D type and its marker |
|                                                                                                         | 2666 (M-708): 𐎠 𐎠 𐎠 𐎠               |
|                                                                                                         | 4082 (H-449): 𐎠 𐎠 𐎠 𐎠 𐎠 𐎠           |
|                                                                                                         | 4141 (H-68): 𐎠 𐎠 𐎠 𐎠 𐎠 𐎠            |
|                                                                                                         | 4351 (H-773): 𐎠 𐎠 𐎠 𐎠 𐎠 𐎠           |
|                                                                                                         | 7107 (L-46): 𐎠 𐎠 𐎠 𐎠 𐎠 𐎠            |
|                                                                                                         | 9011 (Lh-1): 𐎠 𐎠 𐎠 𐎠 𐎠 𐎠            |
|                                                                                                         | 9092 (Sktd-2): 𐎠 𐎠 𐎠 𐎠              |
|                                                                                                         | ICIT 744 (H-1993): 𐎠 𐎠 𐎠 𐎠 𐎠 𐎠      |
|                                                                                                         | ICIT 4348 (Dholavira): 𐎠 𐎠 𐎠 𐎠 𐎠 𐎠  |
| c2                                                                                                      | D2 (33):                            |
|                                                                                                         | 1174 (M-1739): 𐎠 𐎠 𐎠 𐎠 𐎠 𐎠          |
|                                                                                                         | 1222 (M-965): 𐎠 𐎠 𐎠 𐎠 𐎠 𐎠           |
|                                                                                                         | 1433 (M-1343): 𐎠 𐎠 𐎠 𐎠 𐎠 𐎠          |
|                                                                                                         | 1556 (M-203): 𐎠 𐎠 𐎠 𐎠 𐎠 𐎠           |
|                                                                                                         | 2160 (M-933): 𐎠 𐎠 𐎠 𐎠 𐎠 𐎠           |
|                                                                                                         | 2263 (M-131): 𐎠 𐎠 𐎠 𐎠 𐎠 𐎠           |
|                                                                                                         | 2335 (M-900): 𐎠 𐎠 𐎠 𐎠 𐎠 𐎠           |
|                                                                                                         | 2521 (M-300): 𐎠 𐎠 𐎠 𐎠 𐎠 𐎠           |
|                                                                                                         | 2594 (M-94): 𐎠 𐎠 𐎠 𐎠 𐎠 𐎠            |
|                                                                                                         | 2660 (M-851): 𐎠 𐎠 𐎠 𐎠 𐎠 𐎠           |
|                                                                                                         | 2867 (M-437): 𐎠 𐎠 𐎠 𐎠 𐎠 𐎠           |
|                                                                                                         | 3031 (M-12): 𐎠 𐎠 𐎠 𐎠 𐎠 𐎠            |
|                                                                                                         | 4075:10 (H-597): 𐎠 𐎠 𐎠 𐎠 𐎠 𐎠        |
|                                                                                                         | 4075:20 (H-597): 𐎠 𐎠 𐎠 𐎠 𐎠 𐎠        |
|                                                                                                         | 4089 (H-449): 𐎠 𐎠 𐎠 𐎠 𐎠 𐎠           |
|                                                                                                         | 4104 (H-39): 𐎠 𐎠 𐎠 𐎠 𐎠 𐎠            |
|                                                                                                         | 4109 (H-52): 𐎠 𐎠 𐎠 𐎠 𐎠 𐎠            |
|                                                                                                         | 4111 (H-466): 𐎠 𐎠 𐎠 𐎠 𐎠 𐎠           |
|                                                                                                         | 4132 (H-454): 𐎠 𐎠 𐎠 𐎠 𐎠 𐎠           |
|                                                                                                         | 4139 (H-510): 𐎠 𐎠 𐎠 𐎠 𐎠 𐎠           |
|                                                                                                         | 5115 (H-1079): 𐎠 𐎠 𐎠 𐎠 𐎠 𐎠          |
|                                                                                                         | 7215 (L-198): 𐎠 𐎠 𐎠 𐎠 𐎠 𐎠           |
|                                                                                                         | 9822 (x-???/Kish): 𐎠 𐎠 𐎠 𐎠 𐎠 𐎠      |



| Supplementary Catalogue ESM2. Correlation between F3 and M77, anisotropies by D type, and their markers |                                                                                                                                                                                                                                                                                                                                |                                         |
|---------------------------------------------------------------------------------------------------------|--------------------------------------------------------------------------------------------------------------------------------------------------------------------------------------------------------------------------------------------------------------------------------------------------------------------------------|-----------------------------------------|
| Simulation                                                                                              | Anisotropy by D type and its marker                                                                                                                                                                                                                                                                                            |                                         |
|                                                                                                         | 5286 (H-734):                                                                                                                                                                                                                                                                                                                  |                                         |
| c6                                                                                                      | Dx (1):                                                                                                                                                                                                                                                                                                                        |                                         |
|                                                                                                         | 8104 (K-78):                                                                                                                                                                                                                                                                                                                   |                                         |
| 14                                                                                                      | <p>CISI: B-4. M77: - - - -. Symbol: Urus. Orientation: Left. Note: No entry in M77. M77 does not also recognise a left-facing crab sign. ICIT features it as 797 and a look-up for this sign produces four outputs including B-4. The right-facing crab sign  in ICIT is 798, the only sign featured in the results below.</p> |                                         |
| a                                                                                                       | 53 after 162                                                                                                                                                                                                                                                                                                                   | D1 (2):                                 |
|                                                                                                         |                                                                                                                                                                                                                                                                                                                                | 1555 (M-51):                            |
|                                                                                                         |                                                                                                                                                                                                                                                                                                                                | 4351 (H-773):                           |
| b                                                                                                       | 342 after 162                                                                                                                                                                                                                                                                                                                  | D2:                                     |
|                                                                                                         |                                                                                                                                                                                                                                                                                                                                | The look-up is the same as in row 13c1. |
| c                                                                                                       | 53 after 342                                                                                                                                                                                                                                                                                                                   | E1 (1):                                 |
|                                                                                                         |                                                                                                                                                                                                                                                                                                                                | 4827 (H-1393, graffiti on pottery):     |



| Supplementary Catalogue ESM2. Correlation between F3 and M77, anisotropies by D type, and their markers |                                     |                |              |         |
|---------------------------------------------------------------------------------------------------------|-------------------------------------|----------------|--------------|---------|
| Simulation                                                                                              | Anisotropy by D type and its marker |                |              |         |
|                                                                                                         |                                     | 5460 (H-912):  |              |         |
| d1                                                                                                      | 342 after 86                        | D1 (6):        |              |         |
|                                                                                                         |                                     | 1028 (M-756):  |              |         |
|                                                                                                         |                                     | 1066 (M-678):  |              |         |
|                                                                                                         |                                     | 1097 (M-706):  |              |         |
|                                                                                                         |                                     | 1214 (M-211):  |              |         |
|                                                                                                         |                                     | 5090 (H-389):  |              |         |
|                                                                                                         |                                     | 7080 (L-4):    |              |         |
| d2                                                                                                      |                                     | D0 (22):       |              |         |
|                                                                                                         |                                     | 1187 (M-155):  |              |         |
|                                                                                                         |                                     | 1263 (M-951):  |              |         |
|                                                                                                         |                                     | 1336 (M-263):  |              |         |
|                                                                                                         |                                     | 2057 (M-1160): |              |         |
|                                                                                                         |                                     | 2066 (M-937):  |              |         |
|                                                                                                         |                                     | 2157 (M-1695): |              |         |
|                                                                                                         |                                     | 2233 (M-136):  |              |         |
|                                                                                                         |                                     | 2397 (M-389):  |              |         |
|                                                                                                         |                                     | 2526 (M-1982): |              |         |
|                                                                                                         |                                     | 2581 (M-1883): |              |         |
|                                                                                                         |                                     | 2629 (M-812):  |              |         |
|                                                                                                         |                                     | 2805 (M-1431): |              |         |
|                                                                                                         |                                     | 2843 (M-493):  |              |         |
|                                                                                                         |                                     | 2936 (M-2062): |              |         |
|                                                                                                         |                                     | 2941 (x-???):  |              |         |
|                                                                                                         |                                     | 3039 (x-???):  |              |         |
|                                                                                                         |                                     | 3085 (M-837):  |              |         |
|                                                                                                         |                                     | 4145 (H-471):  |              |         |
|                                                                                                         |                                     | 4574 (H-982):  |              |         |
|                                                                                                         |                                     | 4615 (H-440):  |              |         |
|                                                                                                         |                                     | 6213 (C-15):   |              |         |
|                                                                                                         |                                     | 6306 (C-40):   |              |         |
|                                                                                                         |                                     | 7280 (L-141):  |              |         |
|                                                                                                         |                                     | e1             | 342 after 98 | D4 (9): |

| Supplementary Catalogue ESM2. Correlation between F3 and M77, anisotropies by D type, and their markers |                                                                                                                                                                                                                                                                                                                                                                                                                                                                                                                                                                                                                                                                |
|---------------------------------------------------------------------------------------------------------|----------------------------------------------------------------------------------------------------------------------------------------------------------------------------------------------------------------------------------------------------------------------------------------------------------------------------------------------------------------------------------------------------------------------------------------------------------------------------------------------------------------------------------------------------------------------------------------------------------------------------------------------------------------|
| Simulation                                                                                              | Anisotropy by D type and its marker                                                                                                                                                                                                                                                                                                                                                                                                                                                                                                                                                                                                                            |
|                                                                                                         | 2071 (M-709): 𐎧 𐎧 𐎧 𐎧 𐎧. cf. ICIT 2493 𐎧 𐎧 𐎧 𐎧 𐎧 (on the basis that 𐎧 𐎧 is unitary, 112 occurrences in ICIT)                                                                                                                                                                                                                                                                                                                                                                                                                                                                                                                                                   |
|                                                                                                         | 2184 (M-758) 𐎧 𐎧 𐎧 𐎧 𐎧. cf. ICIT 3181 𐎧 𐎧 𐎧 𐎧 𐎧                                                                                                                                                                                                                                                                                                                                                                                                                                                                                                                                                                                                                |
|                                                                                                         | 2213 (M-394): 𐎧 𐎧 𐎧 𐎧 𐎧. cf. ICIT 2890 𐎧 𐎧 𐎧 𐎧 𐎧 (on the basis that 𐎧 𐎧 is unitary, 51 occurrences in ICIT)                                                                                                                                                                                                                                                                                                                                                                                                                                                                                                                                                    |
|                                                                                                         | 2231 (M-707): 𐎧 𐎧 𐎧 𐎧 𐎧. cf. ICIT 2377 𐎧 𐎧 𐎧 𐎧 𐎧                                                                                                                                                                                                                                                                                                                                                                                                                                                                                                                                                                                                               |
|                                                                                                         | 2450 (M-1177): 𐎧 𐎧 𐎧 𐎧                                                                                                                                                                                                                                                                                                                                                                                                                                                                                                                                                                                                                                         |
|                                                                                                         | 2521 (M-300): 𐎧 𐎧 𐎧 𐎧. cf. ICIT 2819 𐎧 𐎧 𐎧 𐎧                                                                                                                                                                                                                                                                                                                                                                                                                                                                                                                                                                                                                   |
|                                                                                                         | 2687 (M-165): 𐎧 𐎧 𐎧 𐎧 𐎧. cf. ICIT 2212 𐎧 𐎧 𐎧 𐎧 𐎧                                                                                                                                                                                                                                                                                                                                                                                                                                                                                                                                                                                                               |
|                                                                                                         | 3044 (M-1979): 𐎧 𐎧 𐎧 𐎧. cf. ICIT 4011 𐎧 𐎧 𐎧 (on the basis that 𐎧 𐎧 is unitary, 39 occurrences in ICIT)                                                                                                                                                                                                                                                                                                                                                                                                                                                                                                                                                         |
|                                                                                                         | 4118 (H-61): 𐎧 𐎧 𐎧 𐎧. cf. ICIT 1120 𐎧 𐎧 𐎧 𐎧 (on the basis that 𐎧 𐎧 𐎧 is unitary, 31 occurrences in ICIT)                                                                                                                                                                                                                                                                                                                                                                                                                                                                                                                                                       |
| e2                                                                                                      | D5 (3):<br>9071 (Dlp-1): 𐎧 𐎧 𐎧 𐎧 𐎧. cf. ICIT 123 𐎧 𐎧 𐎧 𐎧 𐎧 (on the basis that 𐎧 𐎧 are both marked versions of 𐎧, correlated in Section 8.3).<br>1122 (M-782): 𐎧 𐎧 𐎧 𐎧. cf. ICIT 3196 𐎧 𐎧 𐎧 𐎧. (on the basis that '𐎧' is marked with a 4-stroke circumfix, even though evidence is absent for the sign form without the circumfix)<br>1306 (M-266): 𐎧 𐎧 𐎧 𐎧 𐎧. cf. ICIT 2789 𐎧 𐎧 𐎧 𐎧 𐎧 (on the basis that 𐎧 𐎧 are both marked versions of 𐎧, correlated in Section 8.3).                                                                                                                                                                                        |
| e3                                                                                                      | Dx (5):<br>2697 (M-1308): 𐎧 𐎧 𐎧 𐎧 𐎧. cf. ICIT 3613 𐎧 𐎧 𐎧 𐎧 𐎧<br>7224 (L-124): 𐎧 𐎧 𐎧 𐎧 𐎧. cf. ICIT 2068 𐎧 𐎧 𐎧 𐎧 𐎧. ICIT has 11 results for the string 𐎧 𐎧 𐎧. They are all impressions on Lothal clay tags, made most likely with the same seal (Erenez 2020). This analysis takes it as a single occurrence.<br>8004 (K-56) LTR: 𐎧 𐎧 𐎧. cf. ICIT 1919 𐎧 𐎧 𐎧<br>1432 (M-1302): 𐎧 𐎧 𐎧 𐎧<br>2069 (M-634): 𐎧 𐎧 𐎧 𐎧 𐎧. cf. ICIT 3084 𐎧 𐎧 𐎧 𐎧 𐎧                                                                                                                                                                                                                       |
| 18                                                                                                      |  402  249  162<br>CISI: K-39. M77: 8011. Symbol: Rhino. Orientation: Right. Reading direction in M77: LTR. Reading direction in ICIT 1907: RTL. Additional note: The banner or flag on K-39 waves left. The only other instance of a left-waving flag is on 7065 (L-115), and it is doubtful if it is 402, or even a variant of it. M77, ICIT and the font package do not have a left-waving variant. |
| a1                                                                                                      | 162 after 402<br>D1 (6):<br>3031 (M-12): 𐎧 𐎧 𐎧 𐎧 𐎧 𐎧<br>1186 (M-48): 𐎧 𐎧 𐎧 𐎧<br>4304 (H-180): 𐎧 𐎧 𐎧 𐎧<br>4085 (H-54): 𐎧 𐎧 𐎧 𐎧                                                                                                                                                                                                                                                                                                                                                                                                                                                                                                                                  |

| Supplementary Catalogue ESM2. Correlation between F3 and M77, anisotropies by D type, and their markers |                                                                                                                                                                                                                                                                                                                                                                                                                                                                                                                                                                                                                                                                                                                                                                                                                                                                                                                                                                                                                                                                                                                                                                                                                                                                                                                                                                                                                                                                                                                                                                                                                                                                                                                                                                                                                                                                                                                                                                                                                             |
|---------------------------------------------------------------------------------------------------------|-----------------------------------------------------------------------------------------------------------------------------------------------------------------------------------------------------------------------------------------------------------------------------------------------------------------------------------------------------------------------------------------------------------------------------------------------------------------------------------------------------------------------------------------------------------------------------------------------------------------------------------------------------------------------------------------------------------------------------------------------------------------------------------------------------------------------------------------------------------------------------------------------------------------------------------------------------------------------------------------------------------------------------------------------------------------------------------------------------------------------------------------------------------------------------------------------------------------------------------------------------------------------------------------------------------------------------------------------------------------------------------------------------------------------------------------------------------------------------------------------------------------------------------------------------------------------------------------------------------------------------------------------------------------------------------------------------------------------------------------------------------------------------------------------------------------------------------------------------------------------------------------------------------------------------------------------------------------------------------------------------------------------------|
| Simulation                                                                                              | Anisotropy by D type and its marker                                                                                                                                                                                                                                                                                                                                                                                                                                                                                                                                                                                                                                                                                                                                                                                                                                                                                                                                                                                                                                                                                                                                                                                                                                                                                                                                                                                                                                                                                                                                                                                                                                                                                                                                                                                                                                                                                                                                                                                         |
|                                                                                                         | 7005 (L-29): $\Psi \overline{\text{III}} \wedge \text{I} \diamond$                                                                                                                                                                                                                                                                                                                                                                                                                                                                                                                                                                                                                                                                                                                                                                                                                                                                                                                                                                                                                                                                                                                                                                                                                                                                                                                                                                                                                                                                                                                                                                                                                                                                                                                                                                                                                                                                                                                                                          |
|                                                                                                         | ICIT 20 (Blk-2): $\Psi \text{U} / \text{I} \text{I} \text{I} \text{I}$                                                                                                                                                                                                                                                                                                                                                                                                                                                                                                                                                                                                                                                                                                                                                                                                                                                                                                                                                                                                                                                                                                                                                                                                                                                                                                                                                                                                                                                                                                                                                                                                                                                                                                                                                                                                                                                                                                                                                      |
| a2                                                                                                      | D3 (0):<br>6115 (C-22): $\text{I} \Psi \text{II} \langle / \rangle \text{I} \Psi \text{O}$ . Note: $\Psi$ 162 doubles in this sequence and it can be taken as a D3 instance. However it is most likely not a single sequence at all. The line break cannot be negated.                                                                                                                                                                                                                                                                                                                                                                                                                                                                                                                                                                                                                                                                                                                                                                                                                                                                                                                                                                                                                                                                                                                                                                                                                                                                                                                                                                                                                                                                                                                                                                                                                                                                                                                                                      |
| a3                                                                                                      | D5 (2):<br>ICIT 1599 (H-694): $\text{I} \Psi \text{I} \hat{\text{X}} \text{I} \text{I} \text{I}$ (on the basis that $\hat{\text{X}}$ is a marked version of $\text{X}$ )<br>ICIT 1600 (H-695): $\text{I} \Psi \text{I} \hat{\text{X}} \text{I} \text{I} \text{I}$                                                                                                                                                                                                                                                                                                                                                                                                                                                                                                                                                                                                                                                                                                                                                                                                                                                                                                                                                                                                                                                                                                                                                                                                                                                                                                                                                                                                                                                                                                                                                                                                                                                                                                                                                           |
| b1                                                                                                      | 162 after 249<br>D2 (39):<br>1052 (M-66): $\text{I} \Psi \text{I} \hat{\text{X}} \text{I} \text{I} \text{I} \text{I} \text{I}$<br>1174 (M-1739): $\text{I} \Psi \text{I} \text{I} \text{I} \text{I}$<br>1222 (M-965): $\text{I} \Psi \text{I} \text{I} \text{I} \text{I}$<br>1315 (M-1089): $\text{I} \Psi \text{I} \text{I} \text{I} \text{I}$<br>1433 (M-1343): $\text{I} \Psi \text{I} \hat{\text{X}} \text{I} \text{I} \text{I}$<br>1556 (M-203): $\text{I} \Psi \text{I} \text{I} \text{I} \text{I}$<br>2160 (M-933): $\text{I} \Psi \text{I} \text{I} \text{I} \text{I}$<br>2263 (M-131): $\text{I} \Psi \text{I} \text{I} \text{I} \text{I}$<br>2333 (M-35): $\text{I} \Psi \text{I} \text{I} \text{I} \text{I}$<br>2335 (M-900): $\text{I} \Psi \text{I} \text{I} \text{I} \text{I} \text{I} \text{I}$<br>2473 (M-851): $\text{I} \Psi \text{I} \text{I} \text{I} \text{I} \text{I} \text{I}$<br>2521 (M-300): $\text{I} \Psi \text{I} \text{I} \text{I} \text{I}$<br>2569 (M-834): $\text{I} \Psi \text{I} \text{I} \text{I} \text{I}$<br>2594 (M-94): $\text{I} \Psi \text{I} \text{I} \text{I} \text{I}$<br>2609 (M-1902): $\text{I} \Psi \text{I} \text{I} \text{I} \text{I}$<br>2660 (M-851): $\text{I} \Psi \text{I} \text{I} \text{I} \text{I}$<br>2867 (M-437): $\text{I} \Psi \text{I} \text{I} \text{I} \text{I}$<br>3031 (M-12) $\text{I} \Psi \text{I} \text{I} \text{I} \text{I} \text{I} \text{I}$<br>4075:10 (H-597): $\text{I} \Psi \text{I} \text{I} \text{I} \text{I} \text{I} \text{I}$<br>4075:20 (H-597): $\text{I} \Psi \text{I} \text{I} \text{I} \text{I} \text{I} \text{I}$<br>4082 (H-449): $\text{I} \Psi \text{I} \text{I} \text{I} \text{I} \text{I} \text{I}$<br>4104 (H-39): $\text{I} \Psi \text{I} \text{I} \text{I} \text{I} \text{I} \text{I}$<br>4111 (H-4) 466 $\text{I} \Psi \text{I} \text{I} \text{I} \text{I} \text{I} \text{I}$<br>4132 (H-454): $\text{I} \Psi \text{I} \text{I} \text{I} \text{I}$<br>4139 (H-510): $\text{I} \Psi \text{I} \text{I} \text{I} \text{I}$ |

| Supplementary Catalogue ESM2. Correlation between F3 and M77, anisotropies by D type, and their markers |                                                              |
|---------------------------------------------------------------------------------------------------------|--------------------------------------------------------------|
| Simulation                                                                                              | Anisotropy by D type and its marker                          |
|                                                                                                         | 4304: 20 (H-180): 𐎠 𐎢 𐎠 𐎢 𐎠 𐎢                                |
|                                                                                                         | 4304: 10 (H-180): 𐎠 𐎢 𐎠 𐎢 𐎠 𐎢                                |
|                                                                                                         | 6231 (C-12): 𐎠 𐎢 𐎠 𐎢 𐎠 𐎢                                     |
|                                                                                                         | 7215 (L-198): 𐎠 𐎢 𐎠 𐎢 𐎠 𐎢                                    |
|                                                                                                         | 7223 (L-139): 𐎠 𐎢 𐎠 𐎢 𐎠 𐎢                                    |
|                                                                                                         | 7248 (L-196): 𐎠 𐎢 𐎠 𐎢 𐎠 𐎢                                    |
|                                                                                                         | 9822 (x-??/Kish): 𐎠 𐎢 𐎠 𐎢 𐎠 𐎢                                |
|                                                                                                         | ICIT 3226 (M-813): 𐎠 𐎢 𐎠 𐎢 𐎠 𐎢                               |
|                                                                                                         | ICIT 537 (H-1692): 𐎠 𐎢 𐎠 𐎢 𐎠 𐎢                               |
|                                                                                                         | ICIT 4155 (Gonur Depe): 𐎠 𐎢 𐎠 𐎢 𐎠 𐎢                          |
|                                                                                                         | ICIT 4229 (Dholavira): 𐎠 𐎢 𐎠 𐎢 𐎠 𐎢                           |
|                                                                                                         | ICIT 4195 (Dholavira): 𐎠 𐎢 𐎠 𐎢 𐎠 𐎢                           |
|                                                                                                         | ICIT 4182 (Dholavira): 𐎠 𐎢 𐎠 𐎢 𐎠 𐎢                           |
|                                                                                                         | ICIT 2489 (Dholavira): 𐎠 𐎢 𐎠 𐎢 𐎠 𐎢                           |
| b2                                                                                                      | D3 (1):                                                      |
|                                                                                                         | 2312 (M-882): 𐎠 𐎢 𐎠 𐎢 𐎠 𐎢                                    |
| b3                                                                                                      | D4 (27): (on the basis that 𐎠 𐎢 𐎠 𐎢 and 𐎠 𐎢 𐎠 𐎢 are unitary) |
|                                                                                                         | 1081 (M-746): 𐎠 𐎢 𐎠 𐎢 𐎠 𐎢                                    |
|                                                                                                         | 1300 (M-1017): 𐎠 𐎢 𐎠 𐎢 𐎠 𐎢                                   |
|                                                                                                         | 1539 (M-734): 𐎠 𐎢 𐎠 𐎢 𐎠 𐎢                                    |
|                                                                                                         | 2300 (M-968): 𐎠 𐎢 𐎠 𐎢 𐎠 𐎢                                    |
|                                                                                                         | 1609 (M-432): 𐎠 𐎢 𐎠 𐎢 𐎠 𐎢                                    |
|                                                                                                         | 1624 (M-????): 𐎠 𐎢 𐎠 𐎢 𐎠 𐎢                                   |
|                                                                                                         | 3233 (M-433): 𐎠 𐎢 𐎠 𐎢 𐎠 𐎢                                    |
|                                                                                                         | 3239 (M-430): 𐎠 𐎢 𐎠 𐎢 𐎠 𐎢                                    |
|                                                                                                         | 4161 (H-75): 𐎠 𐎢 𐎠 𐎢 𐎠 𐎢                                     |
|                                                                                                         | 4602 (H-816): 𐎠 𐎢 𐎠 𐎢 𐎠 𐎢                                    |
|                                                                                                         | 4625 (H-533): 𐎠 𐎢 𐎠 𐎢 𐎠 𐎢                                    |
|                                                                                                         | 4650 (H-1109): 𐎠 𐎢 𐎠 𐎢 𐎠 𐎢                                   |
|                                                                                                         | 5123 (H-1046): 𐎠 𐎢 𐎠 𐎢 𐎠 𐎢                                   |
|                                                                                                         | 5222 (H-733): 𐎠 𐎢 𐎠 𐎢 𐎠 𐎢                                    |
|                                                                                                         | 5223 (H-1107): 𐎠 𐎢 𐎠 𐎢 𐎠 𐎢                                   |
|                                                                                                         | 5276 (H-857): 𐎠 𐎢 𐎠 𐎢 𐎠 𐎢                                    |

| Supplementary Catalogue ESM2. Correlation between F3 and M77, anisotropies by D type, and their markers |                                                                                                                                                                                                                                                                                                                                                                                                                                                                                                                                                                                                                                                                                                    |
|---------------------------------------------------------------------------------------------------------|----------------------------------------------------------------------------------------------------------------------------------------------------------------------------------------------------------------------------------------------------------------------------------------------------------------------------------------------------------------------------------------------------------------------------------------------------------------------------------------------------------------------------------------------------------------------------------------------------------------------------------------------------------------------------------------------------|
| Simulation                                                                                              | Anisotropy by D type and its marker                                                                                                                                                                                                                                                                                                                                                                                                                                                                                                                                                                                                                                                                |
|                                                                                                         | 5286 (H-734):                                                                                                                                                                                                                                                                                                                                                  |
|                                                                                                         | 5404 (H-1291):                                                                                                                                                                                                                                                                                                                                                                                                                                                                                                                   |
|                                                                                                         | 7267 (L-202):                                                                                                                                                                                                                                                                                                                                                  |
|                                                                                                         | 2176 (M-998):                                                                                                                                                                                                                                                                                                                                                                                                                                                                                                                    |
|                                                                                                         | ICIT 2925 (M-431):                                                                                                                                                                                                                                                            |
|                                                                                                         | ICIT 3812 (M-1592):                                                                                                                                                                                                                                                                                                                                                                                                                                                                                                              |
|                                                                                                         | ICIT 1599 (H-694):                                                                                                                                                                                                                                                            |
|                                                                                                         | ICIT 1600 (H-695):                                                                                                                                                                                                                                                            |
|                                                                                                         | ICIT 1226 (H-194):                                                                                                                                                                                                                                                                                                                                             |
|                                                                                                         | ICIT 868 (H-1802):                                                                                                                                                                                                                                                                                                                                                                                                                                                                                                               |
|                                                                                                         | ICIT 6 (Ad-1):                                                                                                                                                                                                                                                                                                                                                                                                                                                                                                                   |
| c1                                                                                                      | 249 after 402                                                                                                                                                                                                                                                                                                                                                                                                                                                                                                                                                                                                                                                                                      |
|                                                                                                         | D1 (3):                                                                                                                                                                                                                                                                                                                                                                                                                                                                                                                                                                                                                                                                                            |
|                                                                                                         | 3031 (M-12):                                                                                                                                                                                                                                                                  |
|                                                                                                         | 4304 (H-180):                                                                                                                                                                                                                                                                                                                                              |
|                                                                                                         | 8006 (K-10):                                                                                                                                                                                                                                                        |
| c2                                                                                                      |                                                                                                                                                                                                                                                                                                                                                                                                                                                                                                                                                                                                                                                                                                    |
|                                                                                                         | D5 (3):                                                                                                                                                                                                                                                                                                                                                                                                                                                                                                                                                                                                                                                                                            |
|                                                                                                         | 2393 (M-894):      (on the basis that  is a marked version of  )                              |
|                                                                                                         | ICIT 1599 (H-694):      (on the basis that  is a marked version of  )                         |
|                                                                                                         | ICIT 1600 (H-695):                                                                                                                                                                                                                                                  |
| 19                                                                                                      |                                                                                                                                                                                                                                                                                                                                                                                                                                                                                                                                                                                                                                                                                                    |
|                                                                                                         |  <sub>162</sub>  <sub>32</sub>  <sub>102</sub>  <sub>302</sub>                                                                                                                                                                                                                                                                                         |
|                                                                                                         | CISI: Ns-56. M77: - - - -. Symbol: Unicorn. Orientation: Right.                                                                                                                                                                                                                                                                                                                                                                                                                                                                                                                                                                                                                                    |
| a                                                                                                       | 302 after 162                                                                                                                                                                                                                                                                                                                                                                                                                                                                                                                                                                                                                                                                                      |
|                                                                                                         | None                                                                                                                                                                                                                                                                                                                                                                                                                                                                                                                                                                                                                                                                                               |
| b                                                                                                       | 302 after 32                                                                                                                                                                                                                                                                                                                                                                                                                                                                                                                                                                                                                                                                                       |
|                                                                                                         | None                                                                                                                                                                                                                                                                                                                                                                                                                                                                                                                                                                                                                                                                                               |
| c                                                                                                       | 302 after 102                                                                                                                                                                                                                                                                                                                                                                                                                                                                                                                                                                                                                                                                                      |
|                                                                                                         | None                                                                                                                                                                                                                                                                                                                                                                                                                                                                                                                                                                                                                                                                                               |
| d                                                                                                       | 102 after 162                                                                                                                                                                                                                                                                                                                                                                                                                                                                                                                                                                                                                                                                                      |
|                                                                                                         | D1 (1):                                                                                                                                                                                                                                                                                                                                                                                                                                                                                                                                                                                                                                                                                            |
|                                                                                                         | 4141 (H-68):                                                                                                                                                                                                                                                        |
| e                                                                                                       | 102 after 32                                                                                                                                                                                                                                                                                                                                                                                                                                                                                                                                                                                                                                                                                       |
|                                                                                                         | D1 (1):                                                                                                                                                                                                                                                                                                                                                                                                                                                                                                                                                                                                                                                                                            |
|                                                                                                         | 2657 (M-95):                                                                                                                                                                                                                                                        |
| f                                                                                                       | 32 after 162                                                                                                                                                                                                                                                                                                                                                                                                                                                                                                                                                                                                                                                                                       |
|                                                                                                         | None.                                                                                                                                                                                                                                                                                                                                                                                                                                                                                                                                                                                                                                                                                              |
| 20                                                                                                      |                                                                                                                                                                                                                                                                                                                                                                                                                                                                                                                                                                                                                                                                                                    |
|                                                                                                         |  <sub>242</sub>  <sub>342</sub>  <sub>244</sub>  <sub>67</sub>                                                                                                                                                                                                                                                                                         |
|                                                                                                         | CISI: M-1719. M77: 1550. Symbol: Unicorn. Orientation: Right                                                                                                                                                                                                                                                                                                                                                                                                                                                                                                                                                                                                                                       |
| a                                                                                                       | 67 after 242                                                                                                                                                                                                                                                                                                                                                                                                                                                                                                                                                                                                                                                                                       |
|                                                                                                         | D5 (1):                                                                                                                                                                                                                                                                                                                                                                                                                                                                                                                                                                                                                                                                                            |
|                                                                                                         | 4345 (H-206):      (on the basis that  is a modified version of  , correlated in Section 8.4) |
| b1                                                                                                      | 67 after 342                                                                                                                                                                                                                                                                                                                                                                                                                                                                                                                                                                                                                                                                                       |
|                                                                                                         | D1 (2):                                                                                                                                                                                                                                                                                                                                                                                                                                                                                                                                                                                                                                                                                            |

| Supplementary Catalogue ESM2. Correlation between F3 and M77, anisotropies by D type, and their markers |                                                                                                                                                                                                                           |
|---------------------------------------------------------------------------------------------------------|---------------------------------------------------------------------------------------------------------------------------------------------------------------------------------------------------------------------------|
| Simulation                                                                                              | Anisotropy by D type and its marker                                                                                                                                                                                       |
|                                                                                                         | 1347 (M-1910):  cf. ICIT 2414                                                                                                                                                                                             |
|                                                                                                         | 1404 (M-638):                                                                                                                                                                                                             |
| b2                                                                                                      | D2 (2):<br>3319 (M-510): . Note: The first and last signs are documented entirely differently by M77 and ICIT. Thankfully, it does not matter to this analysis.<br>3320 (M-509): .                                        |
| b3                                                                                                      | D4 (2):<br>1093 (M-1792):                                                                                                                                                                                                 |
|                                                                                                         | 1388 (M-960):                                                                                                                                                                                                             |
| b4                                                                                                      | Dx (1):<br>4061 (H-453):                                                                                                                                                                                                  |
| c                                                                                                       | 67 after 244<br>D1 (3):<br>1087 (M-38):                                                                                                                                                                                   |
|                                                                                                         | 2228 (M-1188)                                                                                                                                                                                                             |
|                                                                                                         | ICIT 5218 (Bagasra):                                                                                                                                                                                                      |
| d                                                                                                       | 244 after 242<br>D5 (1):<br>4345 (H-206): . (on the basis that  is a marked version of  244, correlated in Section 8.4)                                                                                                   |
| e1                                                                                                      | 244 after 342<br>D1 (1):<br>4265 (H-645):  cf. ICIT 1560 . If ICIT is correct, then this is a Dx instance. The CISI image shows a marker, but it is a little above compared to the usual position.                        |
| e2                                                                                                      | D4 (0):<br>ICIT 3858 (Nd-1): . Note: ICIT prints this as left to right and boustrophedon. If read right to left, there is no anisotropy in Nd-1 . See Sign set 629-642 (ICIT), and relative position to 740, Section 8.1. |
| f1                                                                                                      | 342 after 242<br>D2 (1):<br>1122 (M-782):  cf. ICIT 3196                                                                                                                                                                  |
| f2                                                                                                      | D2a (1):<br>2014 (M-180):                                                                                                                                                                                                 |
| f3                                                                                                      | D5 (2):<br>4345 (H-206):  (on the basis that there are three marked versions in between: , respectively of )<br>1341 (M-1139):  (on the basis that  is a marked version of , correlated in Section 8.4).                  |
| 21                                                                                                      | 242  162  1<br>CISI: M-1918. M77: 2279. Symbol: Buffalo. Orientation: Left                                                                                                                                                |
| a                                                                                                       | 1 after 242<br>None                                                                                                                                                                                                       |

| Supplementary Catalogue ESM2. Correlation between F3 and M77, anisotropies by D type, and their markers |                                                                                                                                                                                                                                                                                                                         |                                                                           |
|---------------------------------------------------------------------------------------------------------|-------------------------------------------------------------------------------------------------------------------------------------------------------------------------------------------------------------------------------------------------------------------------------------------------------------------------|---------------------------------------------------------------------------|
|                                                                                                         | Simulation                                                                                                                                                                                                                                                                                                              | Anisotropy by D type and its marker                                       |
| b1                                                                                                      | 1 after 162                                                                                                                                                                                                                                                                                                             | D1 (1):<br>4141 (H-68): 𐤁 𐤅 𐤆 𐤇 𐤈 𐤉 𐤊 𐤋                                   |
| b2                                                                                                      |                                                                                                                                                                                                                                                                                                                         | D3 (1):<br>2538 (M-1770) 𐤅 𐤆 𐤇 𐤈 𐤉 𐤊 𐤋                                    |
| b3                                                                                                      |                                                                                                                                                                                                                                                                                                                         | D4 (1):<br>ICIT 578 (H-2197): 𐤅 𐤆 𐤇 𐤈 𐤉 𐤊 𐤋                               |
| c                                                                                                       | 162 after 242                                                                                                                                                                                                                                                                                                           | None.                                                                     |
| 22                                                                                                      | 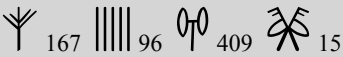 167 96 409 15<br>CISI: M-1180. M77: 1303. Symbol: Human-faced markhor. Orientation: Right                                                                                                                                             |                                                                           |
| a                                                                                                       | 15 after 167                                                                                                                                                                                                                                                                                                            | None                                                                      |
| b                                                                                                       | 15 after 96                                                                                                                                                                                                                                                                                                             | None                                                                      |
| c                                                                                                       | 15 after 409                                                                                                                                                                                                                                                                                                            | None                                                                      |
| d                                                                                                       | 409 after 167                                                                                                                                                                                                                                                                                                           | None                                                                      |
| e                                                                                                       | 409 after 96                                                                                                                                                                                                                                                                                                            | None                                                                      |
| f                                                                                                       | 96 after 167                                                                                                                                                                                                                                                                                                            | None                                                                      |
| 23                                                                                                      |  397 120 342 391 100<br>CISI: M-1718. M77: - - - -. Symbol: Unicorn. Orientation: Right. Note: ICIT documents the first sign as 002, equal to 𐤅99 in M77. I take it as 𐤅 100 in M77, and the decision is rationalised in Section5.6. |                                                                           |
| a                                                                                                       | 100 after 397                                                                                                                                                                                                                                                                                                           | None.                                                                     |
| b                                                                                                       | 100 after 120                                                                                                                                                                                                                                                                                                           | None                                                                      |
| c                                                                                                       | 100 after 342                                                                                                                                                                                                                                                                                                           | None                                                                      |
| d                                                                                                       | 100 after 391                                                                                                                                                                                                                                                                                                           | D1 (2):<br>4152 (H-472) 𐤅 𐤆 𐤇 𐤈 𐤉 𐤊 𐤋 𐤌<br>1478 (M-1369): 𐤅 𐤆 𐤇 𐤈 𐤉 𐤊 𐤋 𐤌 |
| e                                                                                                       | 391 after 397                                                                                                                                                                                                                                                                                                           | None                                                                      |
| f                                                                                                       | 391 after 120                                                                                                                                                                                                                                                                                                           | None                                                                      |
| g                                                                                                       | 391 after 342                                                                                                                                                                                                                                                                                                           | D1 (1):<br>3155 (x-???) 𐤅 𐤆 𐤇 𐤈 𐤉 𐤊 𐤋                                     |
| h                                                                                                       | 342 after 397                                                                                                                                                                                                                                                                                                           | D1 (1):<br>3031 (M-12) 𐤅 𐤆 𐤇 𐤈 𐤉 𐤊 𐤋 𐤌 𐤍 𐤎 𐤏 𐤐                            |
| i                                                                                                       | 342 after 120                                                                                                                                                                                                                                                                                                           | None                                                                      |
| j                                                                                                       | 120 after 397                                                                                                                                                                                                                                                                                                           | None                                                                      |
| 24                                                                                                      |  393. CISI: M-1105. M77: 3080. Symbol: Zebu. Orientation: Right. Note: 393 has solus or terminal presence, and no medial. The zebu is synonymous with 393.                                                                           |                                                                           |
| a                                                                                                       | No look-up                                                                                                                                                                                                                                                                                                              |                                                                           |

| Supplementary Catalogue ESM2. Correlation between F3 and M77, anisotropies by D type, and their markers                                                                                                                                                                                                                                                                     |                                                                                                                                                                                                                                                                                                                                                                                                                                                                                                                                                                                                            |
|-----------------------------------------------------------------------------------------------------------------------------------------------------------------------------------------------------------------------------------------------------------------------------------------------------------------------------------------------------------------------------|------------------------------------------------------------------------------------------------------------------------------------------------------------------------------------------------------------------------------------------------------------------------------------------------------------------------------------------------------------------------------------------------------------------------------------------------------------------------------------------------------------------------------------------------------------------------------------------------------------|
| Simulation                                                                                                                                                                                                                                                                                                                                                                  | Anisotropy by D type and its marker                                                                                                                                                                                                                                                                                                                                                                                                                                                                                                                                                                        |
| 25<br><br>CISI: M-288. M77: 2518. Symbol: Tiger. Orientation: Left. Note: 2518 is the longest sequence involving a frontal sign. 7 signs come before. M77 carries a misprint and reports 257 as 197. 257 has just 3 occurrences in M77. None of the 7 before signs in 2518 come after 257. |                                                                                                                                                                                                                                                                                                                                                                                                                                                                                                                                                                                                            |
| a                                                                                                                                                                                                                                                                                                                                                                           | 125 after 391<br>D3 (1):<br>1110 (M-108):                                                                                                                                                                                                                                                                                                                                                                                                                                                                                 |
| b                                                                                                                                                                                                                                                                                                                                                                           | 125 after 1<br>None                                                                                                                                                                                                                                                                                                                                                                                                                                                                                                                                                                                        |
| c                                                                                                                                                                                                                                                                                                                                                                           | 125 after 342<br>None                                                                                                                                                                                                                                                                                                                                                                                                                                                                                                                                                                                      |
| d                                                                                                                                                                                                                                                                                                                                                                           | 125 after 48<br>None                                                                                                                                                                                                                                                                                                                                                                                                                                                                                                                                                                                       |
| e                                                                                                                                                                                                                                                                                                                                                                           | 125 after 343<br>None                                                                                                                                                                                                                                                                                                                                                                                                                                                                                                                                                                                      |
| f                                                                                                                                                                                                                                                                                                                                                                           | 343 after 391<br>D1 (1)<br>2665 (M-1164):                                                                                                                                                                                                                                                                                                                                                                                                                                                                                 |
| g                                                                                                                                                                                                                                                                                                                                                                           | 343 after 1<br>None                                                                                                                                                                                                                                                                                                                                                                                                                                                                                                                                                                                        |
| h                                                                                                                                                                                                                                                                                                                                                                           | 343 after 342<br>D3 (1):<br>ICIT 4221 (Dholavira):                                                                                                                                                                                                                                                                                                                                                                                                                                                                        |
| i                                                                                                                                                                                                                                                                                                                                                                           | 343 after 48<br>None, though ICIT 2654 reports one instance.                                                                                                                                                                                                                                                                                                                                                                                                                                                                                                                                               |
| j                                                                                                                                                                                                                                                                                                                                                                           | 48 after 391<br>D1 (3)<br>1438 (M-372): <br>1010 (M-595): <br>ICIT 3074 (M-623):                                                                                                                                                                                                                                                                  |
| k                                                                                                                                                                                                                                                                                                                                                                           | 48 after 1<br>D3 (1)<br>2538 (M-1770):                                                                                                                                                                                                                                                                                                                                                                                                                                                                                  |
| l                                                                                                                                                                                                                                                                                                                                                                           | 48 after 342<br>None                                                                                                                                                                                                                                                                                                                                                                                                                                                                                                                                                                                       |
| m                                                                                                                                                                                                                                                                                                                                                                           | 342 after 391<br>ICIT returns 81 results for this query. I filter it down to instances of Dx (2):<br>4813 (H-1402): <br>8020 (K-6):                                                                                                                                                                                                                                                                                                  |
| n                                                                                                                                                                                                                                                                                                                                                                           | 342 after 1<br>Same as in row 16 d1                                                                                                                                                                                                                                                                                                                                                                                                                                                                                                                                                                        |
| o1                                                                                                                                                                                                                                                                                                                                                                          | 1 after 391<br>D1 (5):<br>4043 (H-45): <br>8044 (K-16):  . Note: This is a rare sequence that starts from below.<br>2567 (M-260): <br>1109 (M-865): <br>ICIT 3853 (Ns-5):  |
| o2                                                                                                                                                                                                                                                                                                                                                                          | Dx (1):<br>2445 (M-268):                                                                                                                                                                                                                                                                                                                                                                                                                                                                                                |
| 26                                                                                                                                                                                                                                                                                                                                                                          |  410. CISI. H-95. M77: - - - -. Symbol: Hare. Orientation: Right                                                                                                                                                                                                                                                                                                                                                                                                                                                        |

| Supplementary Catalogue ESM2. Correlation between F3 and M77, anisotropies by D type, and their markers |                                                                                                                                                                                                                                                                                                                                                                                                                                                                                                                                                                                                                                                                                                                                                                                                                                                                                                                                                                                                                                                                                                                                                                                                                                                                                                                                                                                                                                                                                                                                                                                                                                                                                                                                                                                                                                                                                                                                                                                                                                                                                                                                                                                                                                                                                                                                                                                                                                                                                 |
|---------------------------------------------------------------------------------------------------------|---------------------------------------------------------------------------------------------------------------------------------------------------------------------------------------------------------------------------------------------------------------------------------------------------------------------------------------------------------------------------------------------------------------------------------------------------------------------------------------------------------------------------------------------------------------------------------------------------------------------------------------------------------------------------------------------------------------------------------------------------------------------------------------------------------------------------------------------------------------------------------------------------------------------------------------------------------------------------------------------------------------------------------------------------------------------------------------------------------------------------------------------------------------------------------------------------------------------------------------------------------------------------------------------------------------------------------------------------------------------------------------------------------------------------------------------------------------------------------------------------------------------------------------------------------------------------------------------------------------------------------------------------------------------------------------------------------------------------------------------------------------------------------------------------------------------------------------------------------------------------------------------------------------------------------------------------------------------------------------------------------------------------------------------------------------------------------------------------------------------------------------------------------------------------------------------------------------------------------------------------------------------------------------------------------------------------------------------------------------------------------------------------------------------------------------------------------------------------------|
| Simulation                                                                                              | Anisotropy by D type and its marker                                                                                                                                                                                                                                                                                                                                                                                                                                                                                                                                                                                                                                                                                                                                                                                                                                                                                                                                                                                                                                                                                                                                                                                                                                                                                                                                                                                                                                                                                                                                                                                                                                                                                                                                                                                                                                                                                                                                                                                                                                                                                                                                                                                                                                                                                                                                                                                                                                             |
| a                                                                                                       | No look-up<br>Hare is synonymous with 410.                                                                                                                                                                                                                                                                                                                                                                                                                                                                                                                                                                                                                                                                                                                                                                                                                                                                                                                                                                                                                                                                                                                                                                                                                                                                                                                                                                                                                                                                                                                                                                                                                                                                                                                                                                                                                                                                                                                                                                                                                                                                                                                                                                                                                                                                                                                                                                                                                                      |
| 27                                                                                                      |  267  201.<br>M-1367 (2661). Bison x 2. Note: Two facing bisons correspond to two signs in front. If that be so, both signs should not occur in a sequence featuring a single bison. They don't. Only 267 is ever seen on a seal with a single bison. See <a href="#">Bhaskar MV 2022</a> .                                                                                                                                                                                                                                                                                                                                                                                                                                                                                                                                                                                                                                                                                                                                                                                                                                                                                                                                                                                                                                                                                                                                                                                                                                                                                                                                                                                                                                                                                                                                                                                                                                                                                                                                                                                                                                                                                                                                                                                                                   |
| a                                                                                                       | No look-up                                                                                                                                                                                                                                                                                                                                                                                                                                                                                                                                                                                                                                                                                                                                                                                                                                                                                                                                                                                                                                                                                                                                                                                                                                                                                                                                                                                                                                                                                                                                                                                                                                                                                                                                                                                                                                                                                                                                                                                                                                                                                                                                                                                                                                                                                                                                                                                                                                                                      |
| 28                                                                                                      |  167?  60     87  123  305<br>M-1793 (2316). Unicorn. Note: As the identity of the terminal sign is doubtful, I use the rest of the sequence for simulation.                                                                                                                                                                                                                                                                                                                                                                                                                                                                                                                                                                                                                                                                                                                                                                                                                                                                                                                                                                                                                                                                                                                                                                                                                                                                                                                                                                                                                                                                                                                                                                                                                                                                                                                                                                                                                                                                                               |
| a                                                                                                       | 305 after 60<br>None                                                                                                                                                                                                                                                                                                                                                                                                                                                                                                                                                                                                                                                                                                                                                                                                                                                                                                                                                                                                                                                                                                                                                                                                                                                                                                                                                                                                                                                                                                                                                                                                                                                                                                                                                                                                                                                                                                                                                                                                                                                                                                                                                                                                                                                                                                                                                                                                                                                            |
| b                                                                                                       | 305 after 87<br>None                                                                                                                                                                                                                                                                                                                                                                                                                                                                                                                                                                                                                                                                                                                                                                                                                                                                                                                                                                                                                                                                                                                                                                                                                                                                                                                                                                                                                                                                                                                                                                                                                                                                                                                                                                                                                                                                                                                                                                                                                                                                                                                                                                                                                                                                                                                                                                                                                                                            |
| c                                                                                                       | 305 after 123<br>None                                                                                                                                                                                                                                                                                                                                                                                                                                                                                                                                                                                                                                                                                                                                                                                                                                                                                                                                                                                                                                                                                                                                                                                                                                                                                                                                                                                                                                                                                                                                                                                                                                                                                                                                                                                                                                                                                                                                                                                                                                                                                                                                                                                                                                                                                                                                                                                                                                                           |
| d                                                                                                       | 123 after 60<br>None                                                                                                                                                                                                                                                                                                                                                                                                                                                                                                                                                                                                                                                                                                                                                                                                                                                                                                                                                                                                                                                                                                                                                                                                                                                                                                                                                                                                                                                                                                                                                                                                                                                                                                                                                                                                                                                                                                                                                                                                                                                                                                                                                                                                                                                                                                                                                                                                                                                            |
| e                                                                                                       | 123 after 87<br>D0 (2):<br>ICIT 4177 (Dholavira):       . Note: This adjacency   is improbable.<br>ICIT 897 (H-2089):    (incised Harappan tablet)                                                                                                                                                                                                                                                                                                                                                                                                                                                                                                                                                                                                                                                                                                                                                                                                                                                                                                                                                                                                                                                                                                                                                                                                                                                                                                                                                                                                                                                                                                                                                                                                                                                      |
| f1                                                                                                      | 87 after 60<br>E1 (1):<br>C-79 (M77 6211; ICIT 75): Both sources normalise C-79 to an extreme and produce vastly different readings                                                                                                                                                                                                                                                                                                                                                                                                                                                                                                                                                                                                                                                                                                                                                                                                                                                                                                                                                                                                                                                                                                                                                                                                                                                                                                                                                                                                                                                                                                                                                                                                                                                                                                                                                                                                                                                                                                                                                                                                                                                                                                                                                                                                                                                                                                                                             |
| f2                                                                                                      | D3 (1):<br>2456 (M-1769):                                                                                                                                                                                                                                                                                                                                                                                                                                                                                                                                                                                                                                                                                                                                                                                                                                                                                                                                                                                                                                                                                                                                                                                                                                                                                                                                                                                                                                                                                                                                                                                                                                                                                                                                                                                                                                                                                                                                                                                                                                                                                                           |
| 29                                                                                                      |  267  29  99  180  175  28  381  102  327 <br>C-23. 6402. Goat. M77 reports this sequence in 3 lines, and omits the 'double axe'  that the goat is facing. Frontality is not decisive.                                                                                                                                                                                                                                                                                                                                                                                                                                                                                                                                                                                                                                                                                                                                                                                                                                                                                                                                                                                                                                                                                                                                                                                                                                                                                                                                   |
| a                                                                                                       | First sign lost                                                                                                                                                                                                                                                                                                                                                                                                                                                                                                                                                                                                                                                                                                                                                                                                                                                                                                                                                                                                                                                                                                                                                                                                                                                                                                                                                                                                                                                                                                                                                                                                                                                                                                                                                                                                                                                                                                                                                                                                                                                                                                                                                                                                                                                                                                                                                                                                                                                                 |
| b                                                                                                       | 327 after 267<br>D1 (1):<br>5058 (H-137):                                                                                                                                                                                                                                                                                                                                                                                                                                                                                                                                                                                                                                                                                                                                                                                                                                                                                                                                                                                                                                                                                                                                                                                                                                                                                                                                                                                                                                                                                                                                                               |
| c                                                                                                       | 327 after 29<br>None                                                                                                                                                                                                                                                                                                                                                                                                                                                                                                                                                                                                                                                                                                                                                                                                                                                                                                                                                                                                                                                                                                                                                                                                                                                                                                                                                                                                                                                                                                                                                                                                                                                                                                                                                                                                                                                                                                                                                                                                                                                                                                                                                                                                                                                                                                                                                                                                                                                            |
| d                                                                                                       | 327 after 180<br>None                                                                                                                                                                                                                                                                                                                                                                                                                                                                                                                                                                                                                                                                                                                                                                                                                                                                                                                                                                                                                                                                                                                                                                                                                                                                                                                                                                                                                                                                                                                                                                                                                                                                                                                                                                                                                                                                                                                                                                                                                                                                                                                                                                                                                                                                                                                                                                                                                                                           |
| e                                                                                                       | 327 after 175<br>None                                                                                                                                                                                                                                                                                                                                                                                                                                                                                                                                                                                                                                                                                                                                                                                                                                                                                                                                                                                                                                                                                                                                                                                                                                                                                                                                                                                                                                                                                                                                                                                                                                                                                                                                                                                                                                                                                                                                                                                                                                                                                                                                                                                                                                                                                                                                                                                                                                                           |
| f                                                                                                       | 327 after 381<br>None                                                                                                                                                                                                                                                                                                                                                                                                                                                                                                                                                                                                                                                                                                                                                                                                                                                                                                                                                                                                                                                                                                                                                                                                                                                                                                                                                                                                                                                                                                                                                                                                                                                                                                                                                                                                                                                                                                                                                                                                                                                                                                                                                                                                                                                                                                                                                                                                                                                           |
| g                                                                                                       | 327 after 102<br>None                                                                                                                                                                                                                                                                                                                                                                                                                                                                                                                                                                                                                                                                                                                                                                                                                                                                                                                                                                                                                                                                                                                                                                                                                                                                                                                                                                                                                                                                                                                                                                                                                                                                                                                                                                                                                                                                                                                                                                                                                                                                                                                                                                                                                                                                                                                                                                                                                                                           |
| h1                                                                                                      | 102 after 267<br>D1 (10):<br>1091 (M-712):   <br>2080 (M-1697):   <br>2085 (M-72):          <br>3107 (M-391):            |



| Supplementary Catalogue ESM2. Correlation between F3 and M77, anisotropies by D type, and their markers |                                                                                                                                                                                                                                                                                                                                                                                                                                                                                                     |
|---------------------------------------------------------------------------------------------------------|-----------------------------------------------------------------------------------------------------------------------------------------------------------------------------------------------------------------------------------------------------------------------------------------------------------------------------------------------------------------------------------------------------------------------------------------------------------------------------------------------------|
| Simulation                                                                                              | Anisotropy by D type and its marker                                                                                                                                                                                                                                                                                                                                                                                                                                                                 |
| 30                                                                                                      |  <p>M-1792 (1093). Unicorn. Note: The line break on this seal cannot be negated. The frontal signs and the dorsal signs each form two independent sequences. The conclusion is reached on the basis that 342 doubles in a line 22 times, but it occurs thrice only in 1093. The dorsal sign sequence is irrelevant for simulation as sign 82 is a singleton. The frontal three are taken up in the rows below.</p> |
| a                                                                                                       | 59 after 342<br>D4 (1):<br>ICIT 3858 (Nd-1):  . Note: There are three other hits for 59 after 342: 6104, 9101, and ICIT 3377. In each case, at least one sign in between is lost.                                                                                                                                                                                                                                  |
| b                                                                                                       | 59 after 347<br>D4 (1):<br>ICIT 3858 (Nd-1):  . Note: the result is the same as in 30a. It confirms the that a habitual string is an agency and marker of anisotropy,   in this case.                                                            |
| c                                                                                                       | 347 after 342<br>Same as in row 17c.                                                                                                                                                                                                                                                                                                                                                                                                                                                                |
| Seal impressions                                                                                        |                                                                                                                                                                                                                                                                                                                                                                                                                                                                                                     |
| 31                                                                                                      |  <p>K-67 (8121). Urus. Note: This is the only seal impression (a bas relief tablet) in CISI with a same frontal and dorsal sign, 326. Does the sign double anywhere else? No.</p>                                                                                                                                                                                                                                  |
| a                                                                                                       | No look-up                                                                                                                                                                                                                                                                                                                                                                                                                                                                                          |
| 32                                                                                                      |  <p>M-1429. Gharial, also on M-410 in left orientation on a seal, besides M-482 B, M-489 A, M-1923 d, H-172, H-705, H-1958, H-1961.</p>                                                                                                                                                                                                                                                                          |
| a                                                                                                       | No look-up                                                                                                                                                                                                                                                                                                                                                                                                                                                                                          |
| 33                                                                                                      |  <p>M-446. Rhino</p>                                                                                                                                                                                                                                                                                                                                                                                             |
| a                                                                                                       | No look-up                                                                                                                                                                                                                                                                                                                                                                                                                                                                                          |
