# Supplementary material for: Markers and agencies of anisotropy in the Indus sign system
Source: Springer Nature journal article supplement (doi:10.1007/s43539-023-00102-3), 2024-03-01
Supplement: MOESM3 [file 43539_2023_102_MOESM3_ESM.pdf]

## ESM3. Statistical overview of sign 𐀓99 as a marker of anisotropy, D1, in relation to its most frequent base sign, 𐀓267

### List 1. 𐀓99 as a suffix and its base signs

𐀓太 3. 𐀓𠂇 4. 𐀓𠂇 15. 𐀓𠂇 19. 𐀓𠂇 25. 𐀓𠂇 28. 𐀓𠂇 32. 𐀓𠂇 34. 𐀓𠂇 47. 𐀓𠂇 53. 𐀓𠂇 54. 𐀓𠂇 56. 𐀓𠂇 57. 𐀓𠂇 59. 𐀓𠂇(𠂇) 64. 𐀓𠂇 70. 𐀓𠂇(𠂇) 81. 𐀓𠂇(𠂇) 83. 𐀓𠂇 86. 𐀓𠂇 87. 𐀓𠂇 89. 𐀓𠂇 92. 𐀓𠂇 98. 𐀓𠂇 121. 𐀓𠂇 130. 𐀓𠂇 131. 𐀓𠂇 132. 𐀓𠂇 139. 𐀓𠂇 152. 𐀓𠂇 155. 𐀓𠂇 162. 𐀓𠂇 169. 𐀓𠂇 171. 𐀓𠂇 173. 𐀓𠂇 174. 𐀓𠂇 176. 𐀓𠂇 177. 𐀓𠂇 180. 𐀓𠂇 182. 𐀓𠂇 194. 𐀓𠂇 197. 𐀓𠂇 199. 𐀓𠂇 201. 𐀓𠂇 206. 𐀓𠂇 210. 𐀓𠂇 214. 𐀓𠂇 202. 𐀓𠂇 223. 𐀓𠂇 230. 𐀓𠂇 233. 𐀓𠂇 234. 𐀓𠂇 245. 𐀓𠂇 252. 𐀓𠂇 254. 𐀓𠂇 256. 𐀓𠂇 257. 𐀓𠂇 261. 𐀓𠂇 267. 𐀓𠂇 270. 𐀓𠂇 277. 𐀓𠂇 284. 𐀓𠂇 286. 𐀓𠂇 287. 𐀓𠂇 293. 𐀓𠂇 298. 𐀓𠂇 302. 𐀓𠂇 303. 𐀓𠂇 307. 𐀓𠂇 322. 𐀓𠂇 327. 𐀓𠂇 329. 𐀓𠂇 333. 𐀓𠂇 336. 𐀓𠂇 341. 𐀓𠂇 350. 𐀓𠂇 372. 𐀓𠂇 375. 𐀓𠂇 381. 𐀓𠂇 384. 𐀓𠂇 391. 𐀓𠂇 395. 𐀓𠂇 397. 𐀓𠂇 398. 𐀓𠂇 400. 𐀓𠂇 402. 𐀓𠂇 403.

### List 2. Signs that occur on either side of 𐀓267

𠂇 1, 𠂇 17, 𠂇 51, 𠂇 55, 𠂇 59, 𠂇 76, | 86, ||| 89, 𠂇 127, 𠂇 149, 𠂇 150, 𠂇 155, 𠂇 162, 𠂇 180, 𠂇 182, 𠂇 194, 𠂇 197, 𠂇 204, 𠂇 205, 𠂇 216, 𠂇 230, 𠂇 244, 𠂇 249, 𐀓 267, 𐀓 284, 𠂇 287, 𠂇 293, 𠂇 307, 𠂇 328, 𠂇 336, 𠂇 341, 𠂇 342, 𠂇 343, 𠂇 373, 𠂇 375, 𠂇 387, 𠂇 391, 𠂇 402

Supplementary Catalogue ESM3. Sign  $x$  and its transposition relative to 𐀓267/𐀓267a, signalled by 𐀓99, 494 times

Note: The marker of anisotropy that this table reports is D1 𐀓99. A Dx/D0 instance is specifically noted and subtracted from the count expressed in (brackets) .

| Sign $x$ | Before 267                                          | After 267                                                                                                                                                                                                         |
|----------|-----------------------------------------------------|-------------------------------------------------------------------------------------------------------------------------------------------------------------------------------------------------------------------|
| 𠂇 1      | 1553:<br>𠂇 𠂇     𠂇 𠂇 𐀓 𐀓 𐀓 𠂇 𠂇                      | 1386: 𠂇 𠂇 𠂇 𠂇 𐀓 𐀓. 1115, 2068, 2177, 2179, 2255, 2276 𠂇 𠂇 𐀓 𐀓; 2338, 2419, 2647, 4035, 7066. (12)                                                                                                                 |
| 𠂇 17     | 7039                                                | 1011, 2085, 2630, ICIT 4022, ICIT 0158. ICIT 5464 (6)                                                                                                                                                             |
| 𠂇 51     | 1067, 2429, 2543                                    | 1181, 1115, 2085, 2424, 2229, 4005, 7026, 7062, 8006. (9)                                                                                                                                                         |
| 𠂇 55     | 2687                                                | 3232 (1)                                                                                                                                                                                                          |
| 𠂇 59     | 2667, 2460, ICIT 3858                               | 1019, 1032, 1082, 1094, 1324, 1429, 1551, 1621, 2054, 2327, 2429, 2523, 2552, 2587, 2590, 2863, 3042, 3145, 3160, 3164, 4005, 4053, 4073, 4101, 4232, 4812, 4264, 4269, 6129, 6219 ICIT 1434, ICIT 5451 (Dx) (31) |
| 𠂇 76     | 2473, 1036                                          | 1228, 2473. (2)                                                                                                                                                                                                   |
| 86       | 1097, 2397, 2543, 2667, 5102, 5480, 6205, ICIT 1474 | 1429, 2057, 2256, 2332, 2504, 2551, 2612 (Dx), 3039, 4269, 4295, 4316, 6124, 6204, 6216, 7278, 8072, 8214, 9121, and ICIT 0143 (18)                                                                               |
| 89       | 1400, ICIT 4151                                     | 1003, 1094, 1104, 1326, 1429, 1456, 1621, 2251, 2446, 2583, 2654, 2706 (D0), 3153, 3160, 4083, 4316, 4356 (D0), 4477 (D0), 5058, 5062, 8106 (19)                                                                  |
| 𠂇 127    | 8072, 2460                                          | 2327, 2653 (2)                                                                                                                                                                                                    |
| 𠂇 149    | 2473                                                | 2424, 4005, 4485 (Dx), 4658 (Dx), ICIT 0463 (Dx), ICIT 4935 (Dx), ICIT 0405. (3)                                                                                                                                  |
| 𠂇 150    | 1396                                                | 2103 (1)                                                                                                                                                                                                          |

| Supplementary Catalogue ESM3. Sign $x$ and its transposition relative to $\diamond 267/\odot 267a$ , signalled by $\overline{x}99$ , 494 times |                                                                                                                   |                                                                                                                                                                                                                                                                                                                                                                                                                              |
|------------------------------------------------------------------------------------------------------------------------------------------------|-------------------------------------------------------------------------------------------------------------------|------------------------------------------------------------------------------------------------------------------------------------------------------------------------------------------------------------------------------------------------------------------------------------------------------------------------------------------------------------------------------------------------------------------------------|
| $\dagger 155$                                                                                                                                  | 2495                                                                                                              | 1039, 1451, 2237, <u>2290</u> , 2393, 2436, 2555, 2826, 4075:10, 4075:20, <u>7062</u> , ICIT 3115 (12)                                                                                                                                                                                                                                                                                                                       |
| $\Psi 162$                                                                                                                                     | <u>8104</u> , <u>1400</u> , 2473                                                                                  | 1054, 1080, 1091, <u>1131</u> , <u>1143</u> , 1157, <u>1229</u> , 1246, 1433, <u>1537</u> , 2080, <u>2180</u> , 2408, <u>2473</u> , 2569, <u>2636</u> , <u>2648</u> , <u>2660</u> , 3111, 4075:10, 4075:20, 4107, <u>4085</u> , <u>4126</u> , <u>6214</u> , 8122, ICIT <u>401</u> , ICIT 136, ICIT 537, ICIT <u>1669</u> , ICIT <u>0951</u> , ICIT <u>2489</u> , ICIT 3148, ICIT 3226, ICIT 3315, ICIT 4195, ICIT 4260 (37). |
| $\equiv 182$                                                                                                                                   | 2826                                                                                                              | 4119, <u>9071</u> (2)                                                                                                                                                                                                                                                                                                                                                                                                        |
| $\sphericalangle 194$                                                                                                                          | 4096                                                                                                              | <u>1014</u> , <u>1146</u> , <u>1553</u> , <u>2446</u> , <u>2478</u> , 4034 (6)                                                                                                                                                                                                                                                                                                                                               |
| $\uparrow 197$                                                                                                                                 | 4050                                                                                                              | 1340, <u>2013</u> , 4119, 3096 (4)                                                                                                                                                                                                                                                                                                                                                                                           |
| $\triangle 204$                                                                                                                                | 4267, 2495                                                                                                        | <u>1022</u> , <u>1317</u> , <u>1466</u> , <u>1537</u> , <u>2007</u> , <u>2290</u> , <u>2680</u> , <u>5055</u> , ICIT 0013 (9)                                                                                                                                                                                                                                                                                                |
| $\updownarrow 205$                                                                                                                             | 2474, <u>4455</u> , 4504, <u>4510</u> , ICIT <u>0453</u> , ICIT <u>0454</u> , ICIT <u>0801</u> , ICIT <u>0700</u> | 2079, 2393, <u>4375</u> , ICIT <u>1007</u> , ICIT 2142 (5)                                                                                                                                                                                                                                                                                                                                                                   |
| $\bowtie 216$                                                                                                                                  | <u>2356</u> , 8020                                                                                                | <u>1096</u> , <u>1456</u> , <u>2545</u> , 3096, <u>2363</u> , <u>6216</u> (6)                                                                                                                                                                                                                                                                                                                                                |
| $\mathbb{M} 230$                                                                                                                               | 1054                                                                                                              | <u>1322</u> , 2054, <u>2290</u> , <u>2680</u> , 8119 (5)                                                                                                                                                                                                                                                                                                                                                                     |
| $\square 244$                                                                                                                                  | <u>2543</u> , ICIT <u>3858</u>                                                                                    | 2256, 2618, 4090, 5056, <u>6112</u> (5)                                                                                                                                                                                                                                                                                                                                                                                      |
| $\sqcup 249$                                                                                                                                   | 2495, 8006                                                                                                        | 1433, 2393, <u>2473</u> , 2569, <u>2660</u> , 4075:10, 4075:20, 4264, <u>7026</u> , ICIT 0537, ICIT <u>2489</u> , ICIT 3226, ICIT 4195 (13)                                                                                                                                                                                                                                                                                  |
| $\diamond 267$                                                                                                                                 | 2474, 2473                                                                                                        | <u>2474</u> , 2473 (2)                                                                                                                                                                                                                                                                                                                                                                                                       |
| $\diamond 284$                                                                                                                                 | 4549                                                                                                              | 2654 (1)                                                                                                                                                                                                                                                                                                                                                                                                                     |
| $\rangle 287$                                                                                                                                  | 1036                                                                                                              | 2569, 3107, <u>4293</u> , <u>4477</u> (Dx) (3)                                                                                                                                                                                                                                                                                                                                                                               |
| $\rangle 293$                                                                                                                                  | 2654, 4256, ICIT <u>0771</u>                                                                                      | 2290, 2491, 4119, <u>9071</u> , ICIT <u>0771</u> (5)                                                                                                                                                                                                                                                                                                                                                                         |
| $\nabla 307$                                                                                                                                   | 5490, 4589, 1396                                                                                                  | 1340, 2178, 2393 (Dx), ICIT 1024 (3)                                                                                                                                                                                                                                                                                                                                                                                         |
| $\cup 328$ (Dx)                                                                                                                                | 1475, 1477                                                                                                        | 2612 (D0), <u>4316</u> , <u>4356</u> (D0), <u>4477</u> (D0), <u>4485</u> , ICIT <u>0463</u> , ICIT 1709 (4)                                                                                                                                                                                                                                                                                                                  |
| $\cup 336$                                                                                                                                     | ICIT 532, ICIT 3288                                                                                               | <u>1003</u> , 1094, 1104, 1115, 1181, <u>1326</u> , 1340, 1429, <u>1456</u> , 2085, 2251, 2446, 2491, <u>2583</u> , 2654, 3153, <u>3160</u> , <u>4083</u> , <u>4316</u> , <u>5058</u> , <u>5062</u> , <u>7026</u> ICIT <u>0402</u> , ICIT 3115 (24)                                                                                                                                                                          |
| $\nabla 341$                                                                                                                                   | 1426, 3107, 8072                                                                                                  | 1340, 8020 (2)                                                                                                                                                                                                                                                                                                                                                                                                               |
| $\Uparrow 342$                                                                                                                                 | <u>1400</u> , <u>2687</u> , <u>6205</u> , ICIT 3858                                                               | <u>2706</u> (Dx), + (87); 1215 (Dx), + (94)                                                                                                                                                                                                                                                                                                                                                                                  |
| $\Uparrow 343$                                                                                                                                 | 2474                                                                                                              | 2237, 2597, 5056:10, 5056:20, (4)                                                                                                                                                                                                                                                                                                                                                                                            |
| $\circ 373$                                                                                                                                    | 8072                                                                                                              | ICIT 3148 (1)                                                                                                                                                                                                                                                                                                                                                                                                                |
| $\odot 375$                                                                                                                                    | 4083, 2539, <u>1400</u> :03,                                                                                      | <u>2255</u> , <u>2473</u> , <u>2512</u> , 3111, 4080, <u>7062</u> , <u>7095</u> (7)                                                                                                                                                                                                                                                                                                                                          |
| $\odot 387$                                                                                                                                    | 3153, ICIT 3650                                                                                                   | 1104, <u>2081</u> , 2446, 3111, <u>4005</u> , <u>4112</u> , <u>6206</u> , <u>6217</u> , 7008, <u>9001</u> (10)                                                                                                                                                                                                                                                                                                               |
| $\odot 391$                                                                                                                                    | <u>8104</u> , <u>1400</u>                                                                                         | 2468 (Dx), <u>8020</u> (Dx), ICIT 4034, ICIT 4195 (2)                                                                                                                                                                                                                                                                                                                                                                        |
| $\blacktriangleright 402$                                                                                                                      | <u>1036</u> , 2474, 8006,                                                                                         | <u>1103</u> , <u>1203</u> , <u>2007</u> , <u>2419</u> , <u>2304</u> , <u>2356</u> , <u>2635</u> , <u>4085</u> , <u>4427</u> , <u>4454</u> , <u>4460</u> , <u>4477</u> , <u>4485</u> , <u>4535</u> , <u>4658</u> , <u>5324</u> , ICIT <u>0405</u> , ICIT <u>3976</u> , ICIT <u>4935</u> , 1067, 2393, 2656, 3318, 3415, 4050, 4080, 4267, 5102, 7005, 8006, 8020 (31)                                                         |
