# Supplementary material for: Markers and agencies of anisotropy in the Indus sign system
Source: Springer Nature journal article supplement (doi:10.1007/s43539-023-00102-3), 2024-03-01
Supplement: MOESM4 [file 43539_2023_102_MOESM4_ESM.pdf]

## ESM4. Relative sign behaviour for $\overline{\text{99}}$ and $\ominus$ 267a.

| Supplementary Catalogue ESM4. Sign behaviour of $\ominus$ 267a                                                                                                                                                                                                                                                                                                                                                                                                                                                                                                                                                                                                                                                                                                                                                                                                   |                                                                                                                                                                                                                                                    |
|------------------------------------------------------------------------------------------------------------------------------------------------------------------------------------------------------------------------------------------------------------------------------------------------------------------------------------------------------------------------------------------------------------------------------------------------------------------------------------------------------------------------------------------------------------------------------------------------------------------------------------------------------------------------------------------------------------------------------------------------------------------------------------------------------------------------------------------------------------------|----------------------------------------------------------------------------------------------------------------------------------------------------------------------------------------------------------------------------------------------------|
| $\overline{\text{99}}$ -267a: 144                                                                                                                                                                                                                                                                                                                                                                                                                                                                                                                                                                                                                                                                                                                                                                                                                                | $\ominus$ 267a: 34/178                                                                                                                                                                                                                             |
| 1003, 1014, 1019, 1022, 1023, 1031, 1032, 1039, 1082, 1086, 1096, 1103, 1131, 1143, 1146, 1162, 1228, 1229, 1232, 1239, 1274, 1317, 1322, 1326, 1334, 1351, 1372, 1424, 1451, 1456, 1465, 1466, 1537, 1553, 1554, 2011, 2013, 2031, 2048, 2060, 2081, 2100, 2132, 2179, 2180, 2255, 2262, 2288, 2290, 2332, 2338, 2354, 2363, 2403, 2424, 2438, 2450, 2473, 2476, 2478, 2481, 2485, 2512, 2545, 2583, 2591, 2623, 2636, 2648, 2653, 2660, 2674, 2680, 2826, 2837, 2865, 3039, 3042, 3121, 3160, 3164, 3232, 4005, 4011, 4021, 4022, 4053, 4057, 4060, 4083, 4088, 4092, 4101, 4112, 4117, 4126, 4154, 4232, 4268, 4282, 4293, 4314, 4316, 4375, 4441, 4443, 4552, 4812, 5046, 5055, 5058, 5062, 5084, 5264, 6112, 6129, 6206, 6211, 6214, 6216, 6217, 7026, 7062, 7066, 7112, 7203, 7205, 7206, 7228, 7229, 7230, 7231, 7234, 7235, 8022, 9001, 9071, 9202, 9203 | 1036, 1144, 1245, 1297, 1400, 1486, 2007, 2235, 2304, 2356, 2419, 2474, 2543, 2635, 2667, 2687, 2706, 4085, 4356, 4427, 4454, 4455, 4460, 4477, 4485, 4492, 4510, 4533, 4535, 4545, 4586, 4658, 5324, <u>6205</u> , <u>6402</u> , 8012, 8104, 8301 |
| One of either ICIT or CISI reports a no-/mis-match data for 2845, 2551, 5507, 7232, 7233, 5508, 1278, 7095, 7251, 4317, 2930, 4504, 3505, 4589, 5490, 7217.                                                                                                                                                                                                                                                                                                                                                                                                                                                                                                                                                                                                                                                                                                      |                                                                                                                                                                                                                                                    |
