# Supplementary material for: Markers and agencies of anisotropy in the Indus sign system
Source: Springer Nature journal article supplement (doi:10.1007/s43539-023-00102-3), 2024-03-01
Supplement: MOESM5 [file 43539_2023_102_MOESM5_ESM.pdf]

**ESM5. Indus signs that occur on either side of both  $\diamond$  267 and  $\odot$  267a.**

| Supplementary Catalogue ESM5. Sign behaviour of $\diamond$ 267 and $\odot$ 267a in relation to comparison sign x |                                                    |                                                                                                                                                                                                                                                                                                                                                                                                    |
|------------------------------------------------------------------------------------------------------------------|----------------------------------------------------|----------------------------------------------------------------------------------------------------------------------------------------------------------------------------------------------------------------------------------------------------------------------------------------------------------------------------------------------------------------------------------------------------|
| 267 and comparison sign x. For line numbers for both shapes, see S3.                                             |                                                    |                                                                                                                                                                                                                                                                                                                                                                                                    |
| Sign x                                                                                                           | With $\odot$ 267a                                  | With $\text{xx}\odot$ 99-267a                                                                                                                                                                                                                                                                                                                                                                      |
| <u>𑀓</u> 51                                                                                                      | 1400                                               | 2424, 4375, 4005, 7026, 7062                                                                                                                                                                                                                                                                                                                                                                       |
| <u>𑀔</u> 55                                                                                                      | 2687                                               | 1003                                                                                                                                                                                                                                                                                                                                                                                               |
| <u>𑀕</u> 59                                                                                                      | 2235 and 2667                                      | 1014, 1019, 1032, 1082, 1103, 1554, 2826, 3042, 3164, 4005, 4053, 4101, 4232, 4812, and 6129                                                                                                                                                                                                                                                                                                       |
| <u> </u> 86                                                                                                      | 2667                                               | 1003, 2332, 3039, 4316, and 6216                                                                                                                                                                                                                                                                                                                                                                   |
| <u>└</u> 127                                                                                                     | 2667                                               | 2653                                                                                                                                                                                                                                                                                                                                                                                               |
| <u>𑀖</u> 162                                                                                                     | 1400, 4085, and 8104                               | 1131, 1143, 1229, 1537, 2180, 2354, 2473, 2636, 2648, 2660, 4126, and 6214                                                                                                                                                                                                                                                                                                                         |
| <u>)</u> 287                                                                                                     | 1036                                               | 4293                                                                                                                                                                                                                                                                                                                                                                                               |
| <u>U</u> 336                                                                                                     | 4356                                               | 1003, 1326, 1456, 2583, 3160, 4021, 4083, 4316, 5058, 5062, and 7026                                                                                                                                                                                                                                                                                                                               |
| <u>𑀗</u> 342                                                                                                     | 2007, 2419, 2687, 2706, 4455, 4492, 4510, and 8104 | 1014, 1022, 1023, 1082, 1086, 1146, 1162, 1232, 1317, 1322, 1334, 1351, 1465, 1466, 1553, 2011, 2031, 2048, 2179, 2255, 2262, 2288, 2290, 2338, 2363, 2403, 2424, 2450, 2476, 2478, 2481, 2591, 2623, 2653, 2660, 2680, 3039, 3121, 3164, 3232, 4005, 4021, 4057, 4088, 4101, 4268, 4314, 4375, 5055, 5058, 5084, 5264, 6129, 7066, 7203, 7205, 7206, 7228, 7230, 7231, 7234, 7235, 9001, and 9071 |
| <u>⊙</u> 375                                                                                                     |                                                    | 2255, 2473, 2512, 4083 and 7062                                                                                                                                                                                                                                                                                                                                                                    |
