# Supplementary material for: Markers and agencies of anisotropy in the Indus sign system
Source: Springer Nature journal article supplement (doi:10.1007/s43539-023-00102-3), 2024-03-01
Supplement: MOESM7 [file 43539_2023_102_MOESM7_ESM.pdf]

ESM7.  $\bar{1}99$  as an infix to  $\bar{1}342$  in  $\bar{1}344$ , with  $\bar{1}344$  and sans  $\bar{1}342$  after in a same sequence. 15 instances.

14)  $\bar{1}344$   $\bar{1}344$   $\bar{1}344$  3507.  $\bar{1}342$  before  $\bar{1}98$  occurs 12 times (after eliminating duplicates). 3507 is the only instance of 344 before  $\bar{1}98$  and does not explain well.
