# Supplementary material for: Markers and agencies of anisotropy in the Indus sign system
Source: Springer Nature journal article supplement (doi:10.1007/s43539-023-00102-3), 2024-03-01
Supplement: MOESM8 [file 43539_2023_102_MOESM8_ESM.pdf]

| ESM8. Adjacent doubling and distant doubling in an Indus sign sequence |                 |                                                                                                                                                                                                                                                                                                                                                                                                                                                                                       |                                  |                  |
|------------------------------------------------------------------------|-----------------|---------------------------------------------------------------------------------------------------------------------------------------------------------------------------------------------------------------------------------------------------------------------------------------------------------------------------------------------------------------------------------------------------------------------------------------------------------------------------------------|----------------------------------|------------------|
| Sign                                                                   | Adjacent double | Distant double                                                                                                                                                                                                                                                                                                                                                                                                                                                                        | Single with 97, 123, or both     |                  |
| 15                                                                     | 𑀓 175           |                                                                                                                                                                                                                                                                                                                                                                                                                                                                                       | 𑀓 𑀔 𑀓 𑀕 𑀖 𑀗 𑀘 𑀙 𑀚 2566           |                  |
| 16                                                                     | 𑀛 176           | 𑀛 𑀛 𑀜 𑀝 𑀞 𑀟 𑀠 𑀡 1110,<br>1227, 1545, 2035, 2043,<br>2347, 2460, 4372                                                                                                                                                                                                                                                                                                                                                                                                                  | 𑀛 𑀜 𑀛 𑀝 𑀞 𑀟 𑀠 𑀡 4296, 4684, 5270 |                  |
| 17                                                                     | 𑀣 194           | 𑀣 𑀤 𑀥 𑀦 𑀧 𑀨 2301,<br>7016                                                                                                                                                                                                                                                                                                                                                                                                                                                             |                                  |                  |
| 18                                                                     | 𑀩 211           |                                                                                                                                                                                                                                                                                                                                                                                                                                                                                       | 𑀩 𑀪 𑀫 𑀬 𑀭 𑀮 𑀯 𑀰 2436             |                  |
| 19                                                                     | 𑀱 212           | 𑀱 𑀲 𑀳 </> 𑀴 𑀵 (𑀶) 𑀷<br>𑀸 6205                                                                                                                                                                                                                                                                                                                                                                                                                                                         |                                  |                  |
| 20                                                                     | 𑀹 216           | 5489, 5501, 𑀺 𑀻 𑀼 𑀽<br>7044 (mirrored, reckoned as<br>sign 217 in M77), 7280,<br>2363, 2486, 2311, 4583,<br>8039, 2362                                                                                                                                                                                                                                                                                                                                                                |                                  |                  |
| 21                                                                     | 𑀾 237           | 𑀾 𑀿 𑁀 𑁁 </> 𑁂 𑁃 𑁄 4251                                                                                                                                                                                                                                                                                                                                                                                                                                                                |                                  |                  |
| 22                                                                     | 𑁅 244           | 𑁅 𑁆 𑁇 𑁈 𑁉 ICIT 4209                                                                                                                                                                                                                                                                                                                                                                                                                                                                   | 𑁅 𑁆 𑁇 𑁈 𑁉 𑁊 𑁋 𑁌 𑁍 1421           |                  |
| 23                                                                     | 𑁎 245           | 𑁎 𑁏 𑁐 𑁑 𑁒 𑁓 1004,<br>1016, 1056, 1101, 1159,<br>1175, 1180, 1248, 1253,<br>1424, 1437, 1542, 1552,<br>1626, 1710, 2027, 2050,<br>2072, 2073, 2088, 2173,<br>2240, 2292, 2317, 2345,<br>2346, 2350, 2423, 2461,<br>2612, 2802, 2860, 2916,<br>2920, 3088, 3109, 3158,<br>3316, 3318, 3344, 3347,<br>3362, 3393, 3401, 3413,<br>3415, 4012, 4014, 4120,<br>4130, 4133, 4204, 4589,<br>4642, 4645, 4651, 4674,<br>4838, 5274, 5490, 5495,<br>7219, 7220, 7225, 7238,<br>7247, 7252, 9902 | 𑁎 𑁏 𑁐 𑁑 𑁒 𑁓 1004                 | 𑁔 𑁕 𑁖 𑁗 𑁘 𑁙 4123 |
| 24                                                                     | 𑁚 252           | 4003                                                                                                                                                                                                                                                                                                                                                                                                                                                                                  |                                  |                  |





ᲠᲗ 224, ᲠᲗ 252, ᲠᲗ 254, ᲠᲗ 293, ᲠᲗ 307, ᲠᲗ 319, ᲠᲗ 330, ᲠᲗ 336, ᲠᲗ 337, ᲠᲗ 338, ᲠᲗ 342, ᲠᲗ 343,  
ᲠᲗ 345, ᲠᲗ 387, ᲠᲗ 391, ᲠᲗ 402.
