# Supplementary material for: Markers and agencies of anisotropy in the Indus sign system
Source: Springer Nature journal article supplement (doi:10.1007/s43539-023-00102-3), 2024-03-01
Supplement: MOESM9 [file 43539_2023_102_MOESM9_ESM.pdf]

## ESM9. Data for $\overline{1}$ 98 as a neutral marker by null simulation.

| ESM9. Null simulation for $\overline{1}$ 98 and its consequence for a given sign order and its transposed sign order |                                                                                                                                                                                                                              |                                                                                                                                                                                                         |
|----------------------------------------------------------------------------------------------------------------------|------------------------------------------------------------------------------------------------------------------------------------------------------------------------------------------------------------------------------|---------------------------------------------------------------------------------------------------------------------------------------------------------------------------------------------------------|
| Given sign order, with $\overline{1}$ 98 in between                                                                  |                                                                                                                                                                                                                              |                                                                                                                                                                                                         |
| Null simulation                                                                                                      | Null simulation with transposition.                                                                                                                                                                                          |                                                                                                                                                                                                         |
| 1                                                                                                                    | 1432 (M-1302): $\overline{1}$ $\overline{2}$ $\overline{3}$ $\overline{4}$                                                                                                                                                   |                                                                                                                                                                                                         |
|                                                                                                                      | No data, first sign is lost.                                                                                                                                                                                                 |                                                                                                                                                                                                         |
| 2                                                                                                                    | 2184 (M-758) $\overline{1}$ $\overline{2}$ $\overline{3}$ $\overline{4}$ $\overline{5}$ $\overline{6}$ (1/13)                                                                                                                | (Dx = 0/0)                                                                                                                                                                                              |
|                                                                                                                      | $\overline{3}$ 347 after $\overline{4}$ 67. ICIT confirms 13 results for the same sign order only one of which needs a $\overline{1}$ 98 in between: 2184                                                                    | No data for $\overline{4}$ 67 after $\overline{3}$ 347.                                                                                                                                                 |
| 3                                                                                                                    | 2687 (M-165): $\overline{1}$ $\overline{2}$ $\overline{3}$ $\overline{4}$ $\overline{5}$ (1/6)                                                                                                                               | (Dx = 0/0)                                                                                                                                                                                              |
|                                                                                                                      | $\overline{3}$ 347 after $\overline{4}$ 343. ICIT confirms 6 results for the same sign order only one of which needs a $\overline{1}$ 98 in between: 2687.                                                                   | No data for $\overline{4}$ 343 after $\overline{3}$ 347.                                                                                                                                                |
| 4                                                                                                                    | 2071 (M-709): $\overline{1}$ $\overline{2}$ $\overline{3}$ $\overline{4}$ $\overline{5}$ (1/2)                                                                                                                               | (Dx = 0/0)                                                                                                                                                                                              |
|                                                                                                                      | $\overline{2}$ 8 after $\overline{3}$ 127 repeats without $\overline{1}$ 98 on 4655:<br>$\overline{1}$ $\overline{2}$ $\overline{3}$                                                                                         | No data for $\overline{3}$ 127 after $\overline{2}$ 8.                                                                                                                                                  |
| 5                                                                                                                    | 2213 (M-394): $\overline{1}$ $\overline{2}$ $\overline{3}$ $\overline{4}$ $\overline{5}$ (1/2)                                                                                                                               | (Dx = 0/0)                                                                                                                                                                                              |
|                                                                                                                      | $\overline{2}$ 358 after $\overline{3}$ 89 repeats without $\overline{1}$ 98 on 1429:<br>$\overline{1}$ $\overline{2}$ $\overline{3}$ $\overline{4}$ $\overline{5}$ $\overline{6}$ $\overline{7}$                            | No data for $\overline{3}$ 89 after $\overline{2}$ 358.                                                                                                                                                 |
| 6                                                                                                                    | 2231 (M-707): $\overline{1}$ $\overline{2}$ $\overline{3}$ $\overline{4}$ $\overline{5}$ (1/13)                                                                                                                              | (Dx = 0/0)                                                                                                                                                                                              |
|                                                                                                                      | $\overline{3}$ 347 after $\overline{4}$ 67. ICIT confirms 13 results for the same sign order only one of which needs a $\overline{1}$ 98 in between: 2184. The same result as under row 2.                                   | No data for $\overline{4}$ 67 after $\overline{3}$ 347.                                                                                                                                                 |
| 7                                                                                                                    | 3044 (M-1979): $\overline{1}$ $\overline{2}$ $\overline{3}$ $\overline{4}$ (1/3)                                                                                                                                             | (Dx = 0/0)                                                                                                                                                                                              |
|                                                                                                                      | $\overline{2}$ 296 after $\overline{3}$ 391. ICIT confirms 3 results for the same sign order, of which only 3044 needs a $\overline{1}$ 98 in between.                                                                       | No data for $\overline{3}$ 391 after $\overline{2}$ 296                                                                                                                                                 |
| 8                                                                                                                    | 4118 (H-61): $\overline{1}$ $\overline{2}$ $\overline{3}$ $\overline{4}$ (1/1)                                                                                                                                               | (Dx = 0/0)                                                                                                                                                                                              |
|                                                                                                                      | $\overline{2}$ 51 after $\overline{3}$ 412. Only once in 4118                                                                                                                                                                | No data for $\overline{3}$ 412 after $\overline{2}$ 51.                                                                                                                                                 |
| 9                                                                                                                    | 7224 (L-124): $\overline{1}$ $\overline{2}$ $\overline{3}$ $\overline{4}$ $\overline{5}$ $\overline{6}$ (1/2)                                                                                                                | (Dx = 0/0)                                                                                                                                                                                              |
|                                                                                                                      | $\overline{3}$ 121 after $\overline{4}$ 343. One other instance, 2129 (M-1081): $\overline{1}$ $\overline{2}$ $\overline{3}$ $\overline{4}$ $\overline{5}$ $\overline{6}$ which does not need a $\overline{1}$ 98 in between | No data for $\overline{4}$ 343 after $\overline{3}$ 121. ICIT reports 35 instances for $\overline{4}$ 342 after $\overline{3}$ 121. In relation to those 35 instances, a D1 anisotropy obtains in 7224. |
|                                                                                                                      | * This is one of 12 clay stamps from Lothal with an identical impression, taken as one                                                                                                                                       |                                                                                                                                                                                                         |
| 10                                                                                                                   | 8004 (K-56) LTR: $\overline{1}$ $\overline{2}$ $\overline{3}$ (1/1)                                                                                                                                                          | (Dx = 0/0)                                                                                                                                                                                              |
|                                                                                                                      | $\overline{2}$ 319 after $\overline{3}$ 216. Only once on 8004                                                                                                                                                               | No data for $\overline{3}$ 216 after $\overline{2}$ 319.                                                                                                                                                |
| 11                                                                                                                   | 1385 (M-): $\overline{1}$ $\overline{2}$ $\overline{3}$ (1/10)                                                                                                                                                               | (Dx = 2/55)                                                                                                                                                                                             |



| ESM9. Null simulation for $\bar{1} \ 98$ and its consequence for a given sign order and its transposed sign order                     |                                                                                                                                                                                                                                 |
|---------------------------------------------------------------------------------------------------------------------------------------|---------------------------------------------------------------------------------------------------------------------------------------------------------------------------------------------------------------------------------|
| Given sign order, with $\bar{1} \ 98$ in between                                                                                      |                                                                                                                                                                                                                                 |
| Null simulation                                                                                                                       | Null simulation with transposition.                                                                                                                                                                                             |
| $\bar{1} \ 67$ after $\bar{2} \ 67a$ . ICIT confirms 14 results for the same sign order only one of which needs $\bar{1} \ 98$ : 9071 | $\bar{2} \ 67a$ after $\bar{1} \ 67$ occurs in 2543: $\bar{2} \ 67a \ \bar{1} \ 98 \ \bar{2} \ 67a$ </><br>$\bar{1} \ 98 \ \bar{2} \ 67a \ \bar{1} \ 67 \ \bar{1} \ 98$ . In relation to this, a D1 anisotropy obtains in 9071. |
