# Supplementary material for: Markers and agencies of anisotropy in the Indus sign system
Source: Springer Nature journal article supplement (doi:10.1007/s43539-023-00102-3), 2024-03-01
Supplement: MOESM10 [file 43539_2023_102_MOESM10_ESM.pdf]

## ESM10. Sign behaviour for $\mathbb{1} 244$ and its marked versions vis-a-vis $\mathbb{1} 342$ , in an alphanumeric convention.

| ESM10. Sign behaviour of $\mathbb{1} 244$ and its marked versions vis-a-vis 342 |                                                                                                                |                    |
|---------------------------------------------------------------------------------|----------------------------------------------------------------------------------------------------------------|--------------------|
| Sign $x$                                                                        | Before $\mathbb{1} 342$                                                                                        | After $\mathbb{1}$ |
| $\mathbb{1}\mathbb{1} 629$                                                      | This is not an independent sign and is a double of 244a                                                        |                    |
| $\mathbb{1} 244a/630$                                                           | (27)                                                                                                           | None               |
| $\mathbb{1}\mathbb{1} 244b/631$                                                 | None                                                                                                           | None               |
| $\mathbb{1}\mathbb{1} 244/632$                                                  | 4                                                                                                              | 2                  |
| $\mathbb{1}\mathbb{1} 244c/633$                                                 | None                                                                                                           | None               |
| $\mathbb{1}\mathbb{1} 244d/634$                                                 | (1)                                                                                                            | None               |
| $\mathbb{1}\mathbb{1} 244e/635$                                                 | None                                                                                                           | None               |
| $\mathbb{1}\mathbb{1} 244f/636$                                                 | (24)                                                                                                           | None               |
| $\mathbb{1}\mathbb{1} 244g/637$                                                 | (6)                                                                                                            | None               |
| $\mathbb{1}\mathbb{1} 244h/638$                                                 | 1                                                                                                              | None               |
| $\mathbb{1}\mathbb{1} 244i/639$                                                 | 4                                                                                                              | None               |
| $\mathbb{1}\mathbb{1} 244j/640$                                                 | None                                                                                                           | None               |
| $\mathbb{1}\mathbb{1} 641$                                                      | This is a compound of $\mathbb{1}\mathbb{1} 244d$ and $\mathbb{1}\mathbb{1} 219$ , not a marked version of 244 |                    |
| $\mathbb{1}\mathbb{1} 244k/642$                                                 | 1                                                                                                              | None               |
