# Supplementary material for: Markers and agencies of anisotropy in the Indus sign system
Source: Springer Nature journal article supplement (doi:10.1007/s43539-023-00102-3), 2024-03-01
Supplement: MOESM12 [file 43539_2023_102_MOESM12_ESM.pdf]

## ESM12. Intrinsic markers outside the fish sign family

ESM12. An intrinsic marker in a sign family as a signal of anisotropy. Other than the fish sign family.

From row 13c5 in S2. 2137 (M-719): . This is labelled D5 on the basis that is a marked version of 244. To verify, we look at co-occurrences for 342, 162, and 244.

There is one more result for this besides 2137, 1087 (M-38). Between 2137 and 1087, sign order is the same. In 2137, 342 and 162 are adjacent. This agency needs to yield a D2 marker. The expected marker goes missing. Instead, there is an unexpected marker, D5. In D5, the marking is intrinsic, not an affix. > in 2137.

From row 17c in S2. ICIT 1324 (H-102): . On the basis that 172 is a marked version of 171. 59 occurs 92 times after the formative sign . 59 occurs 10 times after the marked version . Are they marked 'appropriately'? In two of ten, they are adjacent and medial. They induce D2. The pair is initial four times with no marker of anisotropy, Dx. For the sign combination 59 after 172 , there are three hits, all D1. In one case, 59 doubles, ICIT 3861 (Pbm-1, CISI). The first one comes after 171. The second fish comes after 172.

From row 20a in S2. 4345 (H-206): . This is labelled D5 on the basis that is a marked version of . When does 54 need that marker and why? In 3232, where 267a comes before 54, the latter remains formative. In 1003 , when 267a comes after a '54' that singles out, the latter needs the marker. The stroke inside 55 may be a case of an infix 97 since 54 is a sign that doubles, and differentiates with an infix when it singles out.

From row 20d in S2. 4345 (H-206): . This is labelled D5 on the basis that is a marked version of 244. The formative sign transforms to when it occurs after 242. This however cannot be verified as 4345 is the only co-occurrence for 242 and any of 244 and 244a-k.

From row 20f3 in S2. 4345 (H-206): . This is labelled D5 on the basis that there are three marked versions in between: , respectively of , verified above with 54 and 55.

From row 20f3 in S2. 1341 (M-1139): . This is labelled D5 on the basis that is a marked version of . Compare this with 2373 (M-154): . The 'harrow' sign is singular when it occurs before 242 ( ) and doubles on the y axis when it occurs after 242 ( ).
