# Supplementary material for: Markers and agencies of anisotropy in the Indus sign system
Source: Springer Nature journal article supplement (doi:10.1007/s43539-023-00102-3), 2024-03-01
Supplement: MOESM13 [file 43539_2023_102_MOESM13_ESM.xlsx]

## Sheet: Sheet 1
ESM13. Updated catalogue of Indus zoomorphism and related seal-impressions, after CISI
CISI ID	Formative	Additive		Extractive	Subtractive	Associative	Orientative
			Feature/s	Component-avatar		Right	Left	F3 Signs, IM-	Seal						Impression
									Face A	Face B	Face C	Face D	Face E	Face F	Face A	Face B	Face C	Face D	Face E	Face F
M-1					✓	F2			Unicorn
M-2					✓	F2			Unicorn
M-3					✓	F2			Unicorn
M-4					✓	F2			Unicorn
M-5					✓	F2			Unicorn
M-6					✓	F2			Unicorn
M-7					✓	F2			Unicorn
M-8					✓	F2			Unicorn
M-9					✓	F2			Unicorn
M-10					✓	F2			Unicorn
M-11					✓	F2			Unicorn
M-12					✓	F2			Unicorn
M-13					✓	F2			Unicorn
M-14					✓	F2			Unicorn
M-15					✓	F2			Unicorn
M-16					✓	F2			Unicorn
M-17					✓	F2			Unicorn
M-18					✓	F2			Unicorn
M-19					✓	F2			Unicorn
M-20					✓	F2			Unicorn
M-21					✓	F2			Unicorn
M-22					✓	F2			Unicorn
M-23					✓	F2			Unicorn
M-24					✓	F2			Unicorn
M-25					✓	F2			Unicorn
M-26					✓	F2			Unicorn
M-27					✓	F2			Unicorn
M-28					✓	F2			Unicorn
M-29					✓	F2			Unicorn
M-30					✓	F2			Unicorn
M-31					✓	F2			Unicorn
M-32					✓	F2			Unicorn
M-33					✓	F2			Unicorn
M-34					✓	F2			Unicorn
M-35					✓	F2			Unicorn
M-36					✓	F2			Unicorn
M-37					✓	F2			Unicorn
M-38					✓	F2			Unicorn
M-39					✓	F2			Unicorn
M-40					✓	F2			Unicorn
M-41					✓	F2			Unicorn
M-42					✓	F2			Unicorn
M-43					✓	F2			Unicorn
M-44					✓	F2			Unicorn
M-45					✓	F2			Unicorn
M-46					✓	F2			Unicorn
M-47					✓	F2			Unicorn
M-48					✓	F2			Unicorn
M-49					✓	F2			Unicorn
M-50					✓	F2			Unicorn
M-51					✓	F2			Unicorn
M-52					✓	F2			Unicorn
M-53					✓	F2			Unicorn
M-54					✓	F2			Unicorn
M-55					✓	F2			Unicorn
M-56					✓	F2			Unicorn
M-57					✓	F2			Unicorn
M-58					✓	F2			Unicorn
M-59					✓	F2			Unicorn
M-60					✓	F2			Unicorn
M-61					✓	F2			Unicorn
M-62					✓	F2			Unicorn
M-63					✓	F2			Unicorn
M-64					✓	F2			Unicorn
M-65					✓	F2			Unicorn
M-66					✓	F2			Unicorn
M-67					✓	F2			Unicorn
M-68					✓	F2			Unicorn
M-69					✓	F2			Unicorn
M-70					✓	F2			Unicorn
M-71					✓	F2			Unicorn
M-72					✓	F2			Unicorn
M-73					✓	F2			Unicorn
M-74					✓	F2			Unicorn
M-75					✓	F2			Unicorn
M-76					✓	b			Unicorn
M-77					✓	F2			Unicorn
M-78					✓	F2			Unicorn
M-79					✓	F2			Unicorn
M-80					✓	F2			Unicorn
M-81					✓	F2			Unicorn
M-82					✓	F2			Unicorn
M-83					✓	F2			Unicorn
M-84					✓	F2			Unicorn
M-85					✓	F2			Unicorn
M-86					✓	F2			Unicorn
M-87					✓	F2			Unicorn
M-88					✓	F2			Unicorn
M-89					✓	F2			Unicorn
M-90					✓	F2			Unicorn
M-91					✓	F2			Unicorn
M-92					✓	F2			Unicorn
M-93					✓	F2			Unicorn
M-94					✓	F2			Unicorn
M-95					✓	F2			Unicorn
M-96					✓	F2			Unicorn
M-97					✓	F2			Unicorn
M-98					✓	F2			Unicorn
M-99					✓	F2			Unicorn
M-100					✓	F2			Unicorn
M-101					✓	F2			Unicorn
M-102					✓	F2			Unicorn
M-103					✓	F2			Unicorn
M-104					✓	F2			Unicorn
M-105					✓	F2			Unicorn
M-106					✓	F2			Unicorn
M-107					✓	F2			Unicorn
M-108					✓	F2			Unicorn
M-109					✓	F2			Unicorn
M-110					✓	F2			Unicorn
M-111					✓	F2			Unicorn
M-112					✓	F2			Unicorn
M-113					✓	F2			Unicorn
M-114					✓	F2			Unicorn
M-115					✓	F2			Unicorn
M-116					✓	F2			Unicorn
M-117					✓	F2			Unicorn
M-118					✓	F2			Unicorn
M-119					✓	F2			Unicorn
M-120					✓	F2			Unicorn
M-121					✓	F2			Unicorn
M-122					✓	F2			Unicorn
M-123					✓	F2			Unicorn
M-124					✓	F2			Unicorn
M-125					✓	F2			Unicorn
M-126					✓	F2			Unicorn
M-127					✓	F2			Unicorn
M-128					✓	F2			Unicorn
M-129					✓	F2			Unicorn
M-130					✓	F2			Unicorn
M-131					✓	F2			Unicorn
M-132					✓	F2			Unicorn
M-133					✓	F2			Unicorn
M-134					✓	F2			Unicorn
M-135					✓	F2			Unicorn
M-136					✓	F2			Unicorn
M-137					✓	F2			Unicorn
M-138					✓	F2			Unicorn
M-139					✓	F2			Unicorn
M-140					✓	F2			Unicorn
M-141					✓	F2			Unicorn
M-142					✓	F2			Unicorn
M-143					✓	F2			Unicorn
M-144					✓	F2			Unicorn
M-145					✓	F2			Unicorn
M-146					✓	F2			Unicorn
M-147					✓	F2			Unicorn
M-148					✓	F2			Unicorn
M-149					✓	F2			Unicorn
M-150					✓	F2			Unicorn
M-151					✓	F2			Unicorn
M-152					✓	F2			Unicorn
M-153					✓	F2			Unicorn
M-154					✓	F2			Unicorn
M-155					✓	F2			Unicorn
M-156					✓	F2			Unicorn
M-157					✓	F2			Unicorn
M-158					✓	F2			Unicorn
M-159					✓	F2			Unicorn
M-160					✓	F2			Unicorn
M-161					✓	F2			Unicorn
M-162					✓	F2			Unicorn
M-163					✓	F2			Unicorn
M-164					✓	F2			Unicorn
M-165					✓	F2			Unicorn
M-166					✓	F2			Unicorn
M-167					✓	F2			Unicorn
M-168					✓	F2			Unicorn
M-169					✓	F2			Unicorn
M-170					✓	F2			Unicorn
M-171					✓	F2			Unicorn
M-172					✓	F2			Unicorn
M-173					✓	F2			Unicorn
M-174					✓	F2			Unicorn
M-175					✓	F2			Unicorn
M-176					✓	F2			Unicorn
M-177					✓	F2			Unicorn
M-178					✓	F2			Unicorn
M-179					✓	F2			Unicorn
M-180					✓	F2			Unicorn
M-181					✓	F2			Unicorn
M-182					✓	F2			Unicorn
M-183					✓	F2			Unicorn
M-184					✓	F2			Unicorn
M-185					✓	F2			Unicorn
M-186					✓	F2			Unicorn
M-187					✓	F2			Unicorn
M-188					✓	F2			Unicorn
M-189					✓	F2			Unicorn
M-190					✓	F2			Unicorn
M-191					✓	F2			Unicorn
M-192					✓	F2			Unicorn
M-193					✓	F2			Unicorn
M-194					✓	F2			Unicorn
M-195					✓	F2			Unicorn
M-196					✓	F2			Unicorn
M-197					✓	F2			Unicorn
M-198					✓	F2			Unicorn
M-199					✓	F2			Unicorn
M-200					✓	F2			Unicorn
M-201					✓	F2			Unicorn
M-202					✓	F2			Unicorn
M-203					✓	F2			Unicorn
M-204					✓	F2			Unicorn
M-205					✓	F2			Unicorn
M-206					✓	F2			Unicorn
M-207					✓	F2			Unicorn
M-208					✓	F2			Unicorn
M-209					✓	F2			Unicorn
M-210					✓	F2			Unicorn
M-211					✓	F2			Unicorn
M-212					✓	F2			Unicorn
M-213					✓	F2			Unicorn
M-214					✓	F2			Unicorn
M-215					✓	F2			Unicorn
M-216					✓	F2			Unicorn
M-217					✓	F2			Unicorn
M-218					✓	F2			Unicorn
M-219					✓	F2			Unicorn
M-220					✓	F2			Unicorn
M-221					✓	F2			Unicorn
M-222					✓	F2			Unicorn
M-223					✓	F3		162; 336, 342	Unicorn
M-224					✓	F2			Unicorn
M-225					✓	F2			Unicorn
M-226					✓	F2			Unicorn
M-227					✓	F2			Unicorn
M-228					✓	F2			Unicorn
M-229					✓	F2			Unicorn
M-230					✓	F2			Unicorn
M-231					✓	F2			Unicorn
M-296		✓	P12		✓	Joined C			Unicorn x 2
M-297		✓	P19	U1	✓	Joined C			Unicorn + 5
		✓		U2					?
		✓		U3					?
		✓		U4					?
		✓		U5					?
		✓		U6					?
M-317					✓	F2			Unicorn
M-320					✓	F2			Unicorn
M-321					✓	F2			Unicorn
M-322						F2			Unicorn
M-323					✓	F2			Unicorn
M-324				U1	✓	F2			Unicorn Si
	✓			U2		F0				Zebu-composite Si
M-325i				U1	✓	F2			Unicorn
				U2	✓	F2				Unicorn
M-326					✓	F2			Unicorn
M-327					✓	F2			Unicorn
M-417		✓	P19	U1	✓	F2, Joined C			Unicorn + 5
		✓		U2		b			Rhino?
		✓		U3		b			Elephant?
		✓		U4		ImF1			Tiger
		✓		U5		ImF2			Urus
		✓		U6		ImF1			Bison
M-427					✓	F2									Unicorn
M-428					✓	F2									Unicorn
M-429					✓	F2									Unicorn
M-445					✓	F2									S	Unicorn X
M-490				S1		-									S	Ensign bearer- banner 1 X
				S2		-									S	Ensign bearer- banner 2
			Property- carriage	S3		F2									S	Ensign bearer- unicorn
			Property- carriage	S4		-									S	Ensign bearer- container
M-491				S1		-									S	Ensign bearer- banner 1 X
				S2		-									S	Ensign bearer- banner 2
			Property- carriage	S3		F2									S	Ensign bearer- unicorn
			Property- carriage	S4		-									S	Ensign bearer- container
M-595					✓	F2			Unicorn
M-621					✓	F2			Unicorn
M-622					✓	F2			Unicorn
M-623					✓	F2			Unicorn
M-624					✓	F2			Unicorn
M-625					✓	b			Unicorn
M-626					✓	F2			Unicorn
M-627					✓	F2			Unicorn
M-628					✓	F2			Unicorn
M-629					✓	F2			Unicorn
M-630					✓	F2			Unicorn
M-631					✓	F2			Unicorn
M-632					✓	F2			Unicorn
M-633					✓	F2			Unicorn
M-634					✓	F2			Unicorn
M-635					✓	F2			Unicorn X-
M-636					✓	F2			Unicorn
M-637					✓	F2			Unicorn
M-638					✓	b			Unicorn
M-639					✓	b			Unicorn
M-640					✓	F2			Unicorn
M-641					✓	F2			Unicorn
M-642					✓	F2			Unicorn
M-643					✓	b			Unicorn
M-644					✓	F2			Unicorn
M-645					✓	F2			Unicorn
M-646					✓	F2			Unicorn
M-647					✓	F2			Unicorn
M-648					✓	F2			Unicorn
M-649					✓	F2			Unicorn
M-650					✓	F2			Unicorn
M-651					✓	F2			Unicorn
M-652					✓	F2			Unicorn
M-653					✓	F2			Unicorn
M-654					✓	F2			Unicorn
M-655					✓	F2			Unicorn
M-656					✓	F2			Unicorn
M-657					✓	F2			Unicorn
M-658					✓	F2			Unicorn
M-659					✓	F2			Unicorn
M-660					✓	?			Unicorn
M-661					✓	F2			Unicorn
M-662					✓	F2			Unicorn
M-663					✓	F2			Unicorn
M-664					✓	F2			Unicorn
M-665					✓	F2			Unicorn
M-666					✓	F2			Unicorn
M-667					✓	b			Unicorn
M-668					✓	b			Unicorn
M-669					✓	b			Unicorn
M-670					✓	F2			Unicorn
M-671					✓	F2			Unicorn
M-672					✓	F2			Unicorn
M-673					✓	F2			Unicorn
M-674					✓	F2			Unicorn
M-675					✓	F2			Unicorn
M-676					✓	F2			Unicorn
M-677					✓	F2			Unicorn
M-678					✓	F2			Unicorn
M-679					✓	F2			Unicorn
M-680					✓	F2			Unicorn
M-681					✓	b			Unicorn
M-682					✓	F2			Unicorn
M-683					✓	b			Unicorn
M-684					✓	b			Unicorn
M-685					✓	b			Unicorn
M-686					✓	b			Unicorn
M-687					✓	F2			Unicorn
M-688					✓	F2			Unicorn
M-689					✓	F2			Unicorn
M-690					✓	F2			Unicorn
M-691					✓	F2			Unicorn
M-692					✓	b			Unicorn
M-693					✓	b			Unicorn
M-694					✓	b			Unicorn
M-695					✓	b			Unicorn
M-696					✓	b			Unicorn
M-697					✓	b			Unicorn
M-698					✓	b			Unicorn
M-699					✓	F2			Unicorn
M-700					✓	F2			Unicorn
M-701					✓	F2			Unicorn
M-702					✓	F2			Unicorn
M-703					✓	F2			Unicorn
M-704					✓	F2			Unicorn
M-705					✓	F2			Unicorn
M-706					✓	F2			Unicorn
M-707					✓	F2			Unicorn
M-708					✓	F2			Unicorn
M-709					✓	F2			Unicorn
M-710					✓	F2			Unicorn
M-711					✓	F2			Unicorn
M-712					✓	F2			Unicorn
M-713					✓	F2			Unicorn
M-714					✓	F2			Unicorn
M-715					✓	F2			Unicorn
M-716					✓	F2			Unicorn
M-717					✓	F2			Unicorn
M-718					✓	F2			Unicorn
M-719					✓	F2			Unicorn
M-720					✓	b			Unicorn
M-721					✓	b			Unicorn
M-722					✓	b			Unicorn
M-723					✓	b			Unicorn
M-724					✓	F2			Unicorn
M-725					✓	F2			Unicorn
M-726					✓	F2			Unicorn
M-727					✓	F2			Unicorn
M-728					✓	F2			Unicorn
M-729					✓	F2			Unicorn
M-730					✓	F2			Unicorn
M-731					✓	F2			Unicorn
M-732					✓	F2			Unicorn
M-733					✓	F2			Unicorn
M-734					✓	F2			Unicorn
M-735					✓	F2			Unicorn
M-736					✓	F2			Unicorn
M-737					✓	F2			Unicorn
M-738					✓	F2			Unicorn
M-739					✓	F2			Unicorn
M-740					✓	F2			Unicorn
M-741					✓	F2			Unicorn
M-742					✓	F2			Unicorn
M-743					✓	F2			Unicorn
M-744					✓	F2			Unicorn
M-745					✓	b			Unicorn
M-746					✓	b			Unicorn
M-747					✓	b			Unicorn
M-748					✓	F2			Unicorn
M-749					✓	F2			Unicorn
M-750					✓	F2			Unicorn
M-751					✓	F2			Unicorn
M-752					✓	F2			Unicorn
M-753					✓	F2			Unicorn
M-754					✓	b			Unicorn
M-755					✓	b			Unicorn
M-756					✓	b			Unicorn
M-757					✓	b			Unicorn
M-758					✓	F2			Unicorn
M-759					✓	b			Unicorn
M-760					✓	b			Unicorn
M-761					✓	b			Unicorn
M-762					✓	b			Unicorn
M-763					✓	F2			Unicorn
M-764					✓	F2			Unicorn
M-765					✓	F2			Unicorn
M-766					✓	F2			Unicorn
M-767					✓	F2			Unicorn
M-768					✓	b			Unicorn
M-769					✓	b			Unicorn
M-770					✓	b			Unicorn
M-771					✓	b			Unicorn
M-772					✓	b			Unicorn
M-773					✓	b			Unicorn
M-774					✓	b			Unicorn
M-775					✓	b			Unicorn
M-776					✓	F2			Unicorn
M-777					✓	F2			Unicorn
M-778					✓	F2			Unicorn
M-779					✓	F2			Unicorn
M-780					✓	F2			Unicorn
M-781					✓	F2			Unicorn
M-782					✓	F2			Unicorn
M-783					✓	F2			Unicorn
M-784					✓	F2			Unicorn
M-785					✓	F2			Unicorn
M-786					✓	F2			Unicorn
M-787					✓	F2			Unicorn
M-788					✓	F2			Unicorn
M-789					✓	F2			Unicorn
M-790					✓	F2			Unicorn
M-791					✓	F2			Unicorn
M-792					✓	F2			Unicorn
M-793					✓	F2			Unicorn
M-794					✓	F2			Unicorn
M-795					✓	F2			Unicorn
M-796					✓	F2			Unicorn
M-797					✓	F2			Unicorn
M-798					✓	F2			Unicorn
M-799					✓	F2			Unicorn
M-800					✓	F2			Unicorn
M-801					✓	F2			Unicorn
M-802					✓	F2			Unicorn
M-803					✓	F2			Unicorn
M-804					✓	F2			Unicorn
M-805					✓	F2			Unicorn
M-806					✓	F2			Unicorn
M-807					✓	F2			Unicorn
M-808					✓	F2			Unicorn
M-809					✓	F2			Unicorn
M-810					✓	F2			Unicorn
M-811					✓	F2			Unicorn
M-812					✓	F2			Unicorn
M-813					✓	F2			Unicorn
M-814					✓	F2			Unicorn
M-815					✓	F2			Unicorn
M-816					✓	F2			Unicorn
M-817					✓	F2			Unicorn
M-818					✓	F2			Unicorn
M-819					✓	F2			Unicorn
M-820					✓	F2			Unicorn
M-821					✓	F2			Unicorn
M-822					✓	F2			Unicorn
M-823					✓	F2			Unicorn
M-824					✓	F2			Unicorn
M-825					✓	F2			Unicorn
M-826					✓	F2			Unicorn
M-827					✓	F2			Unicorn
M-828					✓	F2			Unicorn
M-829					✓	F2			Unicorn
M-830					✓	F2			Unicorn
M-831					✓	F2			Unicorn
M-832					✓	F2			Unicorn
M-833					✓	F2			Unicorn
M-834					✓	F2			Unicorn
M-835					✓	F2			Unicorn
M-836					✓	F2			Unicorn
M-837					✓	F2			Unicorn
M-838					✓	F2			Unicorn
M-839					✓	F2			Unicorn
M-840					✓	F2			Unicorn
M-841					✓	F2			Unicorn
M-842					✓	F2			Unicorn
M-843					✓	F2			Unicorn
M-844					✓	F2			Unicorn
M-845					✓	F2			Unicorn
M-846					✓	F2			Unicorn
M-847					✓	F2			Unicorn
M-848					✓	F2			Unicorn
M-849					✓	F2			Unicorn
M-850					✓	F2			Unicorn
M-851					✓	F2			Unicorn
M-852					✓	F2			Unicorn
M-853					✓	F2			Unicorn
M-854					✓	b			Unicorn
M-855					✓	F2			Unicorn
M-856					✓	b			Unicorn
M-857					✓	b			Unicorn
M-858					✓	b			Unicorn
M-859					✓	b			Unicorn
M-860					✓	F2			Unicorn
M-861					✓	F2			Unicorn
M-862					✓	F2			Unicorn
M-863					✓	F2			Unicorn
M-864					✓	F2			Unicorn
M-865					✓	F2			Unicorn
M-866					✓	F2			Unicorn
M-867					✓	F2			Unicorn
M-868					✓	F2			Unicorn
M-869					✓	F2			Unicorn
M-870					✓	F2			Unicorn
M-871					✓	F2			Unicorn
M-872					✓	F2			Unicorn
M-873					✓	F2			Unicorn
M-874					✓	F2			Unicorn
M-875					✓	F2			Unicorn
M-876					✓	F2			Unicorn
M-877					✓	F2			Unicorn
M-878					✓	F2			Unicorn
M-879					✓	F2			Unicorn
M-880					✓	F2			Unicorn
M-881					✓	F2			Unicorn
M-882					✓	F2			Unicorn
M-883					✓	F2			Unicorn
M-884					✓	F2			Unicorn
M-885					✓	F2			Unicorn
M-886					✓	F2			Unicorn
M-887					✓	F2			Unicorn
M-888					✓	F2			Unicorn
M-889					✓	F2			Unicorn
M-890					✓	F2			Unicorn
M-891					✓	F2			Unicorn
M-892					✓	F2			Unicorn
M-893					✓	b			Unicorn
M-894					✓	F2			Unicorn
M-895					✓	F2			Unicorn
M-896					✓	b			Unicorn
M-897					✓	b			Unicorn
M-898					✓	b			Unicorn
M-899					✓	F2			Unicorn
M-900					✓	b			Unicorn
M-901					✓	b			Unicorn
M-902					✓	b			Unicorn
M-903					✓	?			Unicorn
M-904					✓	F2			Unicorn
M-905					✓	F2			Unicorn
M-906					✓	F2			Unicorn
M-907					✓	b			Unicorn
M-908					✓	b			Unicorn
M-909					✓	b			Unicorn
M-910					✓	b			Unicorn
M-911					✓	b			Unicorn
M-912					✓	b			Unicorn
M-913					✓	b			Unicorn
M-914					✓	F2			Unicorn
M-915					✓	F2			Unicorn
M-916					✓	F2			Unicorn
M-917					✓	F2			Unicorn
M-918					✓	F2			Unicorn
M-919					✓	F2			Unicorn
M-920					✓	F2			Unicorn
M-921					✓	F2			Unicorn
M-922					✓	F2			Unicorn
M-923					✓	F2			Unicorn
M-924					✓	F2			Unicorn
M-925					✓	F2			Unicorn
M-926					✓	F2			Unicorn
M-927					✓	F2			Unicorn
M-928					✓	F2			Unicorn
M-929					✓	F2			Unicorn
M-930					✓	F2			Unicorn
M-931					✓	F2			Unicorn
M-932					✓	F2			Unicorn
M-933					✓	F2			Unicorn
M-934					✓	F2			Unicorn
M-935					✓	F2			Unicorn
M-936					✓	F2			Unicorn
M-937					✓	F2			Unicorn
M-938					✓	F2			Unicorn
M-939					✓	F2			Unicorn
M-940					✓	F2			Unicorn
M-941					✓	F2			Unicorn
M-942					✓	F2			Unicorn
M-943					✓	F2			Unicorn
M-944					✓	F2			Unicorn
M-945					✓	F2			Unicorn
M-946					✓	F2			Unicorn
M-947					✓	F2			Unicorn
M-948					✓	F2			Unicorn
M-949					✓	F2			Unicorn
M-950					✓	F2			Unicorn
M-951					✓	F2			Unicorn
M-952					✓	F2			Unicorn
M-953					✓	F2			Unicorn
M-954					✓	F2			Unicorn
M-955					✓	b			Unicorn
M-956					✓	F2			Unicorn
M-957					✓	b			Unicorn
M-958					✓	F2			Unicorn
M-959					✓	b			Unicorn
M-960					✓	b			Unicorn
M-961					✓	F2			Unicorn
M-962					✓	F2			Unicorn
M-963					✓	F2			Unicorn
M-964					✓	F2			Unicorn
M-965					✓	F2			Unicorn
M-966					✓	F2			Unicorn
M-967					✓	F2			Unicorn
M-968					✓	F2			Unicorn
M-969					✓	F2			Unicorn
M-970					✓	F2			Unicorn
M-971					✓	F2			Unicorn
M-972					✓	F2			Unicorn
M-973					✓	F2			Unicorn
M-974					✓	F2			Unicorn
M-975					✓	F2			Unicorn
M-976					✓	b			Unicorn
M-977					✓	b			Unicorn
M-978					✓	F2			Unicorn
M-979					✓	F2			Unicorn
M-980					✓	b			Unicorn
M-981					✓	F2			Unicorn
M-982					✓	F2			Unicorn
M-983					✓	F2			Unicorn
M-984					✓	b			Unicorn
M-985					✓	b			Unicorn
M-986					✓	b			Unicorn
M-987					✓	F2			Unicorn
M-988					✓	b			Unicorn
M-989					✓	F2			Unicorn
M-990					✓	F2			Unicorn
M-991					✓	F2			Unicorn
M-992					✓	F2			Unicorn
M-993					✓	F2			Unicorn
M-994					✓	F2			Unicorn
M-995					✓	F2			Unicorn
M-996					✓	F2			Unicorn
M-997					✓	F2			Unicorn
M-998					✓	F2			Unicorn
M-999					✓	F2			Unicorn
M-1000					✓	F2			Unicorn
M-1001					✓	F2			Unicorn
M-1002					✓	b			Unicorn
M-1003					✓	b			Unicorn
M-1004					✓	b			Unicorn
M-1005					✓	b			Unicorn
M-1006					✓	b			Unicorn
M-1007					✓	b			Unicorn
M-1008					✓	b			Unicorn
M-1009					✓	b			Unicorn
M-1010					✓	b			Unicorn
M-1011					✓	b			Unicorn
M-1012					✓	b			Unicorn
M-1013					✓	b			Unicorn
M-1014					✓	b			Unicorn
M-1015					✓	b			Unicorn
M-1016					✓	b			Unicorn
M-1017					✓	b			Unicorn
M-1018					✓	b			Unicorn
M-1019					✓	b			Unicorn
M-1020					✓	b			Unicorn
M-1021					✓	b			Unicorn
M-1022					✓	b			Unicorn
M-1023					✓	b			Unicorn
M-1024					✓	b			Unicorn
M-1025					✓	b			Unicorn
M-1026					✓	b			Unicorn
M-1027					✓	b			Unicorn
M-1028					✓	b			Unicorn
M-1029					✓	b			Unicorn
M-1030					✓	b			Unicorn
M-1031					✓	b			Unicorn
M-1032					✓	b			Unicorn
M-1033					✓	b			Unicorn
M-1034					✓	b			Unicorn
M-1035					✓	b			Unicorn
M-1036					✓	b			Unicorn
M-1037					✓	b			Unicorn
M-1038					✓	b			Unicorn
M-1039					✓	b			Unicorn
M-1040					✓	b			Unicorn
M-1041					✓	b			Unicorn
M-1042					✓	b			Unicorn
M-1043					✓	b			Unicorn
M-1044					✓	b			Unicorn
M-1045					✓	b			Unicorn
M-1046					✓	b			Unicorn
M-1047					✓	b			Unicorn
M-1048					✓	b			Unicorn
M-1049					✓	b			Unicorn
M-1050					✓	b			Unicorn
M-1051					✓	b			Unicorn
M-1199					✓		F2 L		Unicorn
M-1200					✓	b			Unicorn
M-1201					✓	F2			Unicorn
M-1203					✓	F2			Unicorn
M-1204					✓	F2			Unicorn
M-1205					✓	F2			Unicorn
M-1221					✓	F2			Unicorn
M-1222					✓	F2			Unicorn
M-1224				U1	✓	F2			Unicorn S
				U2	✓	F2				Unicorn S
			P1	U3							Deity X
			P1	U4									Deity X
M-1383					✓	F2									Unicorn
M-1384					✓	b									Unicorn
M-1385				S1	✓	b									Unicorn Si
					✓	-									Si
					✓	-									Si
					✓	-									Si
M-1387					✓	F2									Unicorn
M-1388					✓	F2									Unicorn
M-1391					✓	F2									Unicorn
M-1392					✓	F2									Unicorn
M-1396					✓	p									Unicorn
M-1427					✓	p									Unicorn
M-1660					✓	F2			Unicorn
M-1661					✓	F2			Unicorn
M-1662					✓	F2			Unicorn
M-1663					✓	F2			Unicorn
M-1664					✓	F2			Unicorn
M-1665					✓	F2			Unicorn
M-1666					✓	F2			Unicorn
M-1667					✓	F2			Unicorn
M-1668					✓	F2			Unicorn
M-1669					✓	F2			Unicorn
M-1670					✓	F2			Unicorn
M-1671					✓	F2			Unicorn
M-1672					✓	F2			Unicorn
M-1673					✓	F2			Unicorn
M-1674					✓	F2			Unicorn
M-1675					✓	F2			Unicorn
M-1676					✓	F2			Unicorn
M-1677					✓	b			Unicorn
M-1678					✓	b			Unicorn
M-1679					✓	b			Unicorn
M-1680					✓	b			Unicorn
M-1681					✓	F2			Unicorn
M-1682					✓	F2			Unicorn
M-1683					✓	F2			Unicorn
M-1684					✓	F2			Unicorn
M-1685					✓	F2			Unicorn
M-1686					✓	F2			Unicorn
M-1687					✓	F2			Unicorn
M-1688					✓	F2			Unicorn
M-1689					✓	F2			Unicorn
M-1690					✓	F2			Unicorn
M-1691					✓	F2			Unicorn
M-1692					✓	F2			Unicorn
M-1693					✓	F2			Unicorn
M-1694					✓	F2			Unicorn
M-1695					✓	F2			Unicorn
M-1696					✓	F2			Unicorn
M-1697					✓	F2			Unicorn
M-1698					✓	F2			Unicorn
M-1699					✓	F2			Unicorn
M-1700					✓	F2			Unicorn
M-1701					✓	F2			Unicorn
M-1702					✓	F2			Unicorn
M-1703					✓	F2			Unicorn
M-1704					✓	F2			Unicorn
M-1705					✓	F2			Unicorn
M-1706					✓	F2			Unicorn
M-1707					✓	F2			Unicorn
M-1708					✓	F2			Unicorn
M-1709					✓	F2			Unicorn
M-1710					✓	F2			Unicorn
M-1711					✓	F2			Unicorn
M-1712					✓	F2			Unicorn
M-1713					✓	F2			Unicorn
M-1714					✓	F2			Unicorn
M-1715					✓	F2			Unicorn
M-1716					✓	F2			Unicorn
M-1717					✓	F2			Unicorn
M-1718					✓	F3		397; 99, 391, 342, 121	Unicorn
M-1719					✓	F3		242; 67, 244, 342	Unicorn
M-1720					✓	F2			Unicorn
M-1721					✓	F2			Unicorn
M-1722					✓	F2			Unicorn
M-1723					✓	F2			Unicorn
M-1724					✓	F2			Unicorn
M-1725					✓	F2			Unicorn
M-1726					✓	F2			Unicorn
M-1727					✓	F2			Unicorn
M-1728					✓	F2			Unicorn
M-1729					✓	F2			Unicorn
M-1730					✓	F2			Unicorn
M-1731					✓	F2			Unicorn
M-1732					✓	F2			Unicorn
M-1733					✓	F2			Unicorn
M-1734					✓	F2			Unicorn
M-1735					✓	F2			Unicorn
M-1736					✓	F2			Unicorn
M-1737					✓	F2			Unicorn
M-1738					✓	F2			Unicorn
M-1739					✓	F2			Unicorn
M-1740					✓	F2			Unicorn
M-1741					✓	F2			Unicorn
M-1742					✓	F2			Unicorn
M-1743					✓	F2			Unicorn
M-1744					✓	F2			Unicorn
M-1745					✓	F2			Unicorn
M-1746					✓	F2			Unicorn
M-1747					✓	F2			Unicorn
M-1748					✓	F2			Unicorn
M-1749					✓	F2			Unicorn
M-1750					✓	F2			Unicorn
M-1751					✓	F2			Unicorn
M-1752					✓	F2			Unicorn
M-1753					✓	F2			Unicorn
M-1754					✓	F2			Unicorn
M-1755					✓	F2			Unicorn
M-1756					✓	F2			Unicorn
M-1757					✓	F2			Unicorn
M-1758					✓	F2			Unicorn
M-1759					✓	F2			Unicorn
M-1760					✓	F2			Unicorn
M-1761					✓	F2			Unicorn
M-1762					✓	F2			Unicorn
M-1763					✓	F2			Unicorn
M-1764					✓	F2			Unicorn
M-1765					✓	F2			Unicorn
M-1766					✓	F2			Unicorn
M-1767					✓	F2			Unicorn
M-1768					✓	F2			Unicorn
M-1769					✓	F2			Unicorn
M-1770					✓	F2			Unicorn
M-1771					✓	F2			Unicorn
M-1772					✓	F2			Unicorn
M-1773					✓	F2			Unicorn
M-1774					✓	F2			Unicorn
M-1775					✓	F2			Unicorn
M-1776					✓	F2			Unicorn
M-1777					✓	F2			Unicorn
M-1778					✓	F2			Unicorn
M-1779					✓	F2			Unicorn
M-1780					✓	F2			Unicorn
M-1781					✓	F2			Unicorn
M-1782					✓	F2			Unicorn
M-1783					✓	F2			Unicorn
M-1784					✓	F2			Unicorn
M-1785					✓	F2			Unicorn
M-1786					✓	F2			Unicorn
M-1787					✓	F2			Unicorn
M-1788					✓	F2			Unicorn
M-1789					✓	F2			Unicorn
M-1790					✓	F2			Unicorn
M-1791					✓	F2			Unicorn
M-1792					✓	F3		347, 342, 67; 342, 82, 342	Unicorn
M-1793					✓	F3		167?; 271, 123, 87, 68	Unicorn
M-1794					✓	F2			Unicorn
M-1795					✓	F2			Unicorn
M-1796					✓	F2			Unicorn
M-1797					✓	F2			Unicorn
M-1798					✓	F2			Unicorn
M-1799					✓	F2			Unicorn
M-1800					✓	F2			Unicorn
M-1801					✓	F2			Unicorn
M-1802					✓	F2			Unicorn
M-1803					✓	F2			Unicorn
M-1804					✓	F2			Unicorn
M-1805					✓	F2			Unicorn
M-1806					✓	F2			Unicorn
M-1807					✓	F2			Unicorn
M-1808					✓	F2			Unicorn
M-1809					✓	F2			Unicorn
M-1810					✓	F2			Unicorn
M-1811					✓	F2			Unicorn
M-1812					✓	F2			Unicorn
M-1813					✓	F2			Unicorn
M-1814					✓	F2			Unicorn
M-1815					✓	F2			Unicorn
M-1816					✓	F2			Unicorn
M-1817					✓	F2			Unicorn
M-1818					✓	F2			Unicorn
M-1819					✓	F2			Unicorn
M-1820					✓	F2			Unicorn
M-1821					✓	F2			Unicorn
M-1822					✓	F2			Unicorn
M-1823					✓	F2			Unicorn
M-1824					✓	F2			Unicorn
M-1825					✓	F2			Unicorn
M-1826					✓	F2			Unicorn
M-1827					✓	F2			Unicorn
M-1828					✓	F2			Unicorn
M-1829					✓	F2			Unicorn
M-1830					✓	F2			Unicorn
M-1831					✓	F2			Unicorn
M-1832					✓	F2			Unicorn
M-1833					✓	F2			Unicorn
M-1834					✓	F2			Unicorn
M-1835					✓	F2			Unicorn
M-1836					✓	F2			Unicorn
M-1837					✓	F2			Unicorn
M-1838					✓	F2			Unicorn
M-1839					✓	F2			Unicorn
M-1840					✓	F2			Unicorn
M-1841					✓	F2			Unicorn
M-1842					✓	F2			Unicorn
M-1843					✓	F2			Unicorn
M-1844					✓	F2			Unicorn
M-1845					✓	F2			Unicorn
M-1846					✓	F2			Unicorn
M-1847					✓	F2			Unicorn
M-1848					✓	F2			Unicorn
M-1849					✓	F2			Unicorn
M-1850					✓	F-			Unicorn
M-1851					✓	F2			Unicorn
M-1852					✓	F2			Unicorn
M-1853					✓	F2			Unicorn
M-1854					✓	F2			Unicorn
M-1855					✓	F-			Unicorn
M-1856					✓	F-			Unicorn
M-1857					✓	F-			Unicorn
M-1858					✓	b			Unicorn
M-1859					✓	b			Unicorn
M-1860					✓	F2			Unicorn
M-1861					✓	F2			Unicorn
M-1862					✓	F2			Unicorn
M-1863					✓	b			Unicorn
M-1864					✓	b			Unicorn
M-1865					✓	F2			Unicorn
M-1866					✓	b			Unicorn
M-1867					✓	b			Unicorn
M-1868					✓	b			Unicorn
M-1869					✓	b			Unicorn
M-1870					✓	b			Unicorn
M-1871					✓	b			Unicorn
M-1925					✓	?			Unicorn
M-1929					✓	F2			Unicorn
M-2000					✓	F2									Unicorn
M-2010					✓	F2									Unicorn
M-2012					✓	F2									Unicorn
H-1					✓	F2			Unicorn
H-2					✓	F2			Unicorn
H-3					✓	F2			Unicorn
H-4					✓	F2			Unicorn
H-5					✓	F2			Unicorn
H-6					✓	F2			Unicorn
H-7					✓	F2			Unicorn
H-8					✓	F2			Unicorn
H-9					✓	F2			Unicorn
H-10					✓	F2			Unicorn
H-11					✓	F2			Unicorn
H-12					✓	F2			Unicorn
H-13					✓	F2			Unicorn
H-14					✓	F2			Unicorn
H-15					✓	F2			Unicorn
H-16					✓	F2			Unicorn
H-17					✓	F2			Unicorn
H-18					✓	F2			Unicorn
H-19					✓	F2			Unicorn
H-20					✓	F2			Unicorn
H-21					✓	F2			Unicorn
H-22					✓	F2			Unicorn
H-23					✓	F2			Unicorn
H-24					✓	F2			Unicorn
H-25					✓	F2			Unicorn
H-26					✓	F2			Unicorn
H-27					✓	F2			Unicorn
H-28					✓	F2			Unicorn
H-29					✓	F2			Unicorn
H-30					✓	F2			Unicorn
H-31					✓	F2			Unicorn
H-32					✓	F2			Unicorn
H-33					✓	F2			Unicorn
H-34					✓	F2			Unicorn
H-35					✓	F2			Unicorn
H-36					✓	F2			Unicorn
H-37					✓	F2			Unicorn
H-38					✓	F2			Unicorn
H-39					✓	F2			Unicorn
H-40					✓	F2			Unicorn
H-41					✓	F2			Unicorn
H-42					✓	F2			Unicorn
H-43					✓	F2			Unicorn
H-44					✓	F2			Unicorn
H-45					✓	F2			Unicorn
H-46					✓	F2			Unicorn
H-47					✓	F2			Unicorn
H-48					✓	F2			Unicorn
H-49					✓	F2			Unicorn
H-50					✓	F2			Unicorn
H-51					✓	F2			Unicorn
H-52					✓	F2			Unicorn
H-53					✓	F2			Unicorn
H-54					✓	F2			Unicorn
H-55					✓	F2			Unicorn
H-56					✓	F2			Unicorn
H-57					✓	F2			Unicorn
H-58					✓	F2			Unicorn
H-59					✓	F2			Unicorn
H-60					✓		F2 L		Unicorn
H-61					✓	F2			Unicorn
H-62					✓	F2			Unicorn
H-63					✓	F2			Unicorn
H-64					✓	F2			Unicorn
H-65					✓	F2			Unicorn
H-66					✓	F2			Unicorn
H-67					✓	F2			Unicorn
H-68					✓	F2			Unicorn
H-69					✓	F2			Unicorn
H-70					✓		F2 L		Unicorn
H-71					✓		F2 L		Unicorn
H-72					✓	F2			Unicorn
H-73					✓		F2 L		Unicorn
H-74					✓	F2			Unicorn
H-75					✓	F2			Unicorn
H-102					✓	F2			Unicorn
H-169					✓	F2									Unicorn
H-170					✓	F2									S	Unicorn X
H-252					✓	F-									S	Unicorn X
H-253					✓	F-									S	Unicorn X
H-254					✓	F-									S	Unicorn X
H-255					✓	F-									S	Unicorn X
H-256					✓	F-									S	Unicorn X
H-257					✓	F-									S	Unicorn X
H-258					✓	F-									S	Unicorn X
H-259					✓	F-									S	Unicorn X
H-260					✓	F-									S	Unicorn X
H-261					✓	F-									S	Unicorn X
H-262					✓	F-									S	Unicorn X
H-263					✓	F-									S	Unicorn X
H-264					✓	F-									S	Unicorn X
H-265					✓	F-									S	Unicorn X
H-266					✓	F2			Unicorn
H-267					✓	F2			Unicorn
H-268					✓	F2			Unicorn
H-269					✓	F2			Unicorn
H-270					✓	F2			Unicorn
H-271					✓	b			Unicorn
H-272					✓	b			Unicorn
H-273					✓	b			Unicorn
H-274					✓	F2			Unicorn
H-275					✓	b			Unicorn
H-276					✓	F-									S	Unicorn X
H-277					✓	F-									S	Unicorn X
H-356					✓	b			Unicorn
H-383					✓	F2			Unicorn
H-384					✓	F2			Unicorn
H-385					✓	F2			Unicorn
H-386					✓	F2			Unicorn
H-387					✓	F2			Unicorn
H-388					✓	F2			Unicorn
H-389					✓	F2			Unicorn
H-390					✓	F2			Unicorn
H-391					✓	F2			Unicorn
H-392					✓	b			Unicorn
H-393					✓	F2			Unicorn
H-394					✓	F2			Unicorn
H-395					✓	F2			Unicorn
H-396					✓	F2			Unicorn
H-397					✓	F2			Unicorn
H-398					✓	F2			Unicorn
H-399					✓	F2			Unicorn
H-400					✓	b			Unicorn
H-401					✓	b			Unicorn
H-402					✓	b			Unicorn
H-403					✓	b			Unicorn
H-404					✓	b			Unicorn
H-405					✓	F2			Unicorn
H-406					✓	F2			Unicorn
H-407					✓	F2			Unicorn
H-408					✓	b			Unicorn
H-409					✓	b			Unicorn
H-410					✓	b			Unicorn
H-411					✓	F2			Unicorn
H-412					✓	b			Unicorn
H-413					✓	F2			Unicorn
H-414					✓	F2			Unicorn
H-415					✓	F2			Unicorn
H-416					✓	F2			Unicorn
H-417					✓	b			Unicorn
H-418					✓	F2			Unicorn
H-419					✓	F2			Unicorn
H-420					✓	F2			Unicorn
H-421					✓	F2			Unicorn
H-422					✓	F2			Unicorn
H-423					✓	b			Unicorn
H-424					✓	b			Unicorn
H-425					✓	b			Unicorn
H-426					✓	b			Unicorn
H-427					✓	b			Unicorn
H-428					✓	b			Unicorn
H-429					✓	b			Unicorn
H-430					✓	F2			Unicorn
H-431					✓	b			Unicorn
H-432					✓	b			Unicorn
H-433					✓	F2			Unicorn
H-434					✓	F2			Unicorn
H-435					✓	F2			Unicorn
H-436					✓	F2			Unicorn
H-437					✓	F2			Unicorn
H-438					✓	b			Unicorn
H-439					✓	F2			Unicorn
H-440					✓	F2			Unicorn
H-441					✓	F2			Unicorn
H-442					✓	F2			Unicorn
H-443					✓	F2			Unicorn
H-444					✓	F2			Unicorn
H-445					✓	F2			Unicorn
H-446					✓	F2			Unicorn
H-447					✓	F2			Unicorn
H-448					✓	F2			Unicorn
H-449					✓	F2			Unicorn
H-450					✓	F2			Unicorn
H-451					✓	F2			Unicorn
H-452					✓	F2			Unicorn
H-453					✓	F2			Unicorn
H-454					✓	F2			Unicorn
H-455					✓	F2			Unicorn
H-456					✓	F2			Unicorn
H-457					✓	F2			Unicorn
H-458					✓	F2			Unicorn
H-459					✓	F2			Unicorn
H-460					✓	F2			Unicorn
H-461					✓	F2			Unicorn
H-462					✓	F2			Unicorn
H-463					✓	F2			Unicorn
H-464					✓	F2			Unicorn
H-465					✓	F2			Unicorn
H-466					✓	F2			Unicorn
H-467					✓	F2			Unicorn
H-468					✓	F2			Unicorn
H-469					✓	F2			Unicorn
H-470					✓	F2			Unicorn
H-471					✓	F2			Unicorn
H-472					✓	b			Unicorn
H-473					✓	F2			Unicorn
H-474					✓	F2			Unicorn
H-475					✓	F2			Unicorn
H-476					✓	F2			Unicorn
H-477					✓	F2			Unicorn
H-478					✓	F2			Unicorn
H-479					✓	F2			Unicorn
H-480					✓	F2			Unicorn
H-481					✓	F2			Unicorn
H-482					✓	b			Unicorn
H-483					✓	b			Unicorn
H-484					✓	b			Unicorn
H-485					✓	b			Unicorn
H-486					✓	b			Unicorn
H-487					✓	b			Unicorn
H-489					✓	b			Unicorn
H-490					✓	b			Unicorn
H-491					✓	F2			Unicorn
H-492					✓	F2			Unicorn
H-493					✓	F2			Unicorn
H-494					✓	F2			Unicorn
H-495					✓	b			Unicorn
H-496					✓	F2			Unicorn
H-497					✓	b			Unicorn
H-498					✓	F2			Unicorn
H-499					✓	F2			Unicorn
H-500					✓	F2			Unicorn
H-501					✓	F2			Unicorn
H-502					✓	F2			Unicorn
H-503					✓	F2			Unicorn
H-504					✓	F2			Unicorn
H-505					✓	F2			Unicorn
H-506					✓	F2			Unicorn
H-507					✓	F2			Unicorn
H-508					✓	F2			Unicorn
H-509					✓	F2			Unicorn
H-510					✓	F2			Unicorn
H-511					✓	F2			Unicorn
H-512					✓	F2			Unicorn
H-513					✓	F2			Unicorn
H-514					✓	F2			Unicorn
H-515					✓	F2			Unicorn
H-516					✓	F2			Unicorn
H-517					✓	F2			Unicorn
H-518					✓	F2			Unicorn
H-519					✓	F2			Unicorn
H-520					✓	F2			Unicorn
H-521					✓	F2			Unicorn
H-522					✓	F2			Unicorn
H-523					✓	b			Unicorn
H-524					✓	b			Unicorn
H-525					✓	b			Unicorn
H-526					✓	b			Unicorn
H-527					✓	b			Unicorn
H-528					✓	b			Unicorn
H-529					✓	b			Unicorn
H-530					✓	F2			Unicorn
H-531					✓	b			Unicorn
H-532					✓	b			Unicorn
H-533					✓	b			Unicorn
H-534					✓	b			Unicorn
H-535					✓	b			Unicorn
H-536					✓	b			Unicorn
H-537					✓	b			Unicorn
H-538					✓	b			Unicorn
H-539					✓	b			Unicorn
H-540					✓	b			Unicorn
H-541					✓	b			Unicorn
H-542					✓	b			Unicorn
H-543					✓	b			Unicorn
H-544					✓	b			Unicorn
H-545					✓	b			Unicorn
H-546					✓	b			Unicorn
H-547					✓	b			Unicorn
H-548					✓	b			Unicorn
H-549					✓	b			Unicorn
H-550					✓	b			Unicorn
H-551					✓	b			Unicorn
H-552					✓	b			Unicorn
H-553					✓	b			Unicorn
H-554					✓	b			Unicorn
H-555					✓	b			Unicorn
H-556					✓	b			Unicorn
H-557					✓	b			Unicorn
H-597					✓	F2			Unicorn Si		Si
H-598					✓	F2			Unicorn S				S
H-599				U1	✓	b			Unicorn S
				U2		F-						Gharial X
H-600					✓	F2			Unicorn
H-601					✓	F2			Unicorn
H-606					✓	F2			Unicorn
H-607					✓	b			Unicorn?
H-609					✓	F2			Unicorn
H-610					✓	F2			Unicorn
H-611					✓	b			Unicorn
H-612					✓	F2			Unicorn
H-694					✓	F2									Unicorn
H-695					✓	F2									Unicorn
H-696					✓	b									S	Unicorn X
H-697					✓	F2									S	Unicorn S
H-859					✓	F-									S	Unicorn X
H-860					✓	F-									S	Unicorn X
H-861					✓	F-									S	Unicorn X
H-862					✓	F-									S	Unicorn X
H-863					✓	F-									S	Unicorn X
H-864					✓	F-									S	Unicorn X
H-865					✓	F-									S	Unicorn X
H-866					✓	F-									S	Unicorn X
H-867					✓	F-									S	Unicorn X
H-868					✓	F-									S	Unicorn X
H-869					✓	F-									S	Unicorn X
H-870					✓	F-									S	Unicorn X
H-1020					✓	F2			Unicorn
H-1021					✓	F2			Unicorn
H-1022					✓	F2			Unicorn
H-1023					✓	F2			Unicorn
H-1024					✓	F2			Unicorn
H-1025					✓	F2			Unicorn
H-1026					✓	b			Unicorn
H-1027					✓	F2			Unicorn
H-1028					✓	F2			Unicorn
H-1029					✓	F2			Unicorn
H-1030					✓	F2			Unicorn
H-1031					✓	b			Unicorn
H-1032					✓	F2			Unicorn
H-1033					✓	F2			Unicorn
H-1034					✓	F2			Unicorn
H-1035					✓	F2			Unicorn
H-1036					✓	F2			Unicorn
H-1037					✓	F2			Unicorn
H-1038					✓	F2			Unicorn
H-1039					✓	F2			Unicorn
H-1040					✓	F2			Unicorn
H-1041					✓	b			Unicorn
H-1042					✓	F2			Unicorn
H-1043					✓	F2			Unicorn
H-1044					✓	F2			Unicorn
H-1045					✓	F2			Unicorn
H-1046					✓	F-			Unicorn
H-1047					✓	F2			Unicorn
H-1048					✓	F2			Unicorn
H-1049					✓	F2			Unicorn
H-1050					✓	F2			Unicorn
H-1051					✓	F2			Unicorn
H-1052					✓	F2			Unicorn
H-1053					✓	F2			Unicorn
H-1054					✓	F2			Unicorn
H-1055					✓	F2			Unicorn
H-1056					✓	F2			Unicorn
H-1155					✓	F-									S	Unicorn X
H-1657					✓	F2			Unicorn
H-1658					✓	F2			Unicorn
H-1659					✓	b			Unicorn
H-1660					✓	b			Unicorn
H-1661					✓	b			Unicorn
H-1662					✓	F2			Unicorn
H-1663					✓	b			Unicorn
H-1664					✓	F2			Unicorn
H-1665					✓	F2			Unicorn
H-1666					✓	F2			Unicorn
H-1667					✓	F2			Unicorn
H-1668					✓	F2			Unicorn
H-1669					✓	F2			Unicorn
H-1670					✓	F2			Unicorn
H-1671					✓	F2			Unicorn
H-1672					✓	F2			Unicorn
H-1673					✓	F2			Unicorn
H-1674					✓	F2			Unicorn
H-1675					✓	b			Unicorn
H-1676					✓	b			Unicorn
H-1677					✓	F2			Unicorn
H-1678					✓	F2			Unicorn
H-1679					✓	F2			Unicorn
H-1680					✓	F2			Unicorn
H-1681					✓	b			Unicorn
H-1682					✓	F2			Unicorn
H-1683					✓	F2			Unicorn
H-1684					✓	F2			Unicorn
H-1685					✓	b			Unicorn
H-1686					✓	F2			Unicorn
H-1687					✓	F2			Unicorn
H-1688					✓	b			Unicorn
H-1724					✓	F2									Unicorn
H-1725					✓	F2									Unicorn
H-1929					✓	F2									S	S	Unicorn X
H-1951				S1	✓	F2									Unicorn S
			P1	S2												Deity under pipal arch X
H-1968			P12	S1	✓	Compound									S	Unicorn x 2
			P2, P14	S2											S	Middle human, arms waving
H-2590					✓	F2			Unicorn
L-1					✓	F2			Unicorn
L-2					✓	F2			Unicorn
L-3					✓	F2			Unicorn
L-4					✓	F2			Unicorn
L-5					✓	F2			Unicorn
L-6					✓	F2			Unicorn
L-7					✓	F2			Unicorn
L-8					✓	b			Unicorn
L-9					✓	F2			Unicorn
L-10					✓	F2			Unicorn
L-11					✓	F2			Unicorn
L-12					✓	F2			Unicorn
L-13					✓	F2			Unicorn
L-14					✓	F-			Unicorn
L-15					✓	F2			Unicorn
L-16					✓	F2			Unicorn
L-17					✓	F2			Unicorn
L-18					✓	F2			Unicorn
L-19					✓	F2			Unicorn
L-20					✓	F2			Unicorn
L-21					✓	F2			Unicorn
L-22					✓	F2			Unicorn
L-23					✓	F2			Unicorn
L-24					✓	F2			Unicorn
L-25					✓	b			Unicorn
L-26					✓	F2			Unicorn
L-27					✓	F2			Unicorn
L-28					✓	F2			Unicorn
L-29					✓	F2			Unicorn
L-30					✓	F2			Unicorn
L-31					✓	b			Unicorn
L-32					✓	b			Unicorn
L-33					✓	b			Unicorn
L-34					✓	b			Unicorn
L-35					✓	F2			Unicorn
L-36					✓	F2			Unicorn
L-37					✓	F2			Unicorn
L-38					✓	F2			Unicorn
L-39					✓	F2			Unicorn
L-40					✓	b			Unicorn
L-41					✓	F-			Unicorn
L-42					✓	F2			Unicorn
L-43					✓	b			Unicorn
L-44					✓	F2			Unicorn
L-65					✓	F2			Unicorn S				S
L-66					✓	F2			Unicorn S		S	S	S	S
L-107					✓	F-			Unicorn X
L-125					✓	F2									Unicorn
L-126					✓	F2									Unicorn
L-127					✓	b/p									Unicorn
L-128					✓	b/p									Unicorn
L-129					✓	b/p									Unicorn
L-130					✓	b/p									Unicorn
L-131					✓	b/p									Unicorn
L-132					✓	b/p									Unicorn
L-133					✓	F2									Unicorn
L-134					✓	b/p									Unicorn
L-135					✓	b/p									Unicorn
L-136					✓	F2									Unicorn
L-137					✓	F2									Unicorn
L-138					✓	b/p									Unicorn
L-139					✓	b/p									Unicorn
L-140					✓	F2									Unicorn
L-141					✓	F2									Unicorn
L-142					✓	F2									Unicorn
L-143					✓	F2									Unicorn
L-144					✓	F2									Unicorn
L-145					✓	b									Unicorn
L-146					✓	b									Unicorn
L-147					✓	F2									Unicorn
L-148					✓	F2									Unicorn
L-149					✓	F2									Unicorn
L-150					✓	F2									Unicorn
L-151					✓	F2									Unicorn
L-152					✓	F2									Unicorn
L-153					✓	b									Unicorn
L-154					✓	b									Unicorn
L-155					✓	b									Unicorn
L-156					✓	F2									Unicorn
L-157					✓	F2									Unicorn
L-158					✓	b									Unicorn
L-159					✓	b									Unicorn
L-160					✓	b									Unicorn
L-189					✓	p									Unicorn S
					✓	p									Unicorn S
					✓	p									Unicorn S
					✓	p									Unicorn S
L-190					✓	p									Unicorn S
					✓	p									Unicorn S
					✓	p									Unicorn S
L-191					✓	p									Unicorn S
					✓	b									Unicorn S
L-192					✓	p									Unicorn S
						-									S
L-193					✓	F2									Unicorn S
						-									S
					✓	p									Unicorn S
L-194					✓	p									Unicorn S
					✓	p									Unicorn S
L-195					✓	b									Unicorn S
					✓	b									Unicorn S
L-196					✓	p									Unicorn S
					✓	b/p									Unicorn S
L-197					✓	p									Unicorn S
					✓	p									Unicorn S
L-198					✓	p									Unicorn S
					✓	p									Unicorn S
L-199					✓	p									Unicorn S
															S
L-200					✓	p									Unicorn S
					✓	p									Unicorn S
L-201															S
					✓	p									Unicorn S
L-202															S
					✓										Unicorn S
L-204						b									? S					S
L-206															S
					✓	p									Unicorn S
L-207					✓	F2									Unicorn S
					✓	F2									Unicorn S
L-208															S
					✓	p/b									Unicorn S
L-210					✓	b									Unicorn S
															S
L-211						p									S
						p/b									?
L-213						p/b									S
						p/b									?
						p/b									S
L-217				S1		F2									S	Unicorn S
				S2		F1										Bison
L-218					✓	p									Unicorn
L-219					✓	p									Unicorn
K-1					✓	F2			Unicorn
K-2					✓	F2			Unicorn
K-3					✓	F-			Unicorn
K-4					✓	F2			Unicorn
K-5					✓	F2			Unicorn
K-6					✓	F2			Unicorn
K-7					✓	F2			Unicorn
K-8					✓	F2			Unicorn
K-9					✓	F2			Unicorn
K-10					✓	F2			Unicorn
K-11					✓	F2			Unicorn
K-12					✓	F2			Unicorn
K-13					✓	F2			Unicorn
K-14					✓	F2			Unicorn
K-15					✓	F2			Unicorn
K-16					✓	F2			Unicorn
K-17					✓	F2			Unicorn
K-18					✓	F2			Unicorn
K-19					✓	F2			Unicorn
K-20					✓	b			Unicorn
K-21					✓	b			Unicorn
K-22					✓	F2			Unicorn
K-23					✓	F2			Unicorn
K-24					✓	F2			Unicorn
K-25					✓	b			Unicorn
K-26					✓		F3 L	342; 326	Unicorn
K-56					✓		F2 L		Unicorn
K-68					✓	F2									S	Unicorn S
K-69					✓	p									Unicorn
K-70					✓	p									Unicorn
K-71					✓	p									Unicorn
K-72					✓	p									Unicorn
K-73					✓	p									Unicorn
K-74					✓	p									Unicorn
K-75					✓	p									Unicorn
K-80					✓	F2									Unicorn
K-81					✓	b									Unicorn
K-82					✓	b									Unicorn
K-83					✓	b									Unicorn S
						-									?
K-86						-									S
					✓	b	F2 L								Unicorn
						-									S
						-									S
K-88					✓	F2									Unicorn S
					✓	F2									Unicorn S
					✓	p									Unicorn S
					✓	F2									Unicorn S
K-89															S
															S
					✓	p									Unicorn S
					✓	F2									Unicorn S
K-145					✓	F2			Unicorn
K-146					✓	F2			Unicorn
K-147					✓	F2			Unicorn
K-148					✓	b			Unicorn
K-149					✓	F2			Unicorn
K-155					✓	F-									Unicorn
K-156					✓	p									Unicorn
C-1					✓	F-			Unicorn
C-2					✓	F2			Unicorn
C-3					✓	F2			Unicorn
C-4					✓	F2			Unicorn
C-5					✓	F2			Unicorn
C-6					✓	F2			Unicorn
C-8					✓	F2			Unicorn
C-9					✓	F2			Unicorn
C-10					✓	F2			Unicorn
C-11					✓	b			Unicorn
C-12					✓	F2			Unicorn
C-13					✓	F2			Unicorn
C-14					✓	F-			Unicorn
C-15					✓	F2			Unicorn
C-16					✓	F2			Unicorn
C-17					✓		F3 L	1; 342, 8	Unicorn
C-18					✓	F2			Unicorn
C-20					✓	F2			Unicorn
C-21					✓	F2			Unicorn
C-32					✓	F2			Unicorn
C-51					✓	F2			Unicorn
C-52					✓	F2			Unicorn
C-53					✓	F2			Unicorn
C-54					✓	F2			Unicorn
C-55					✓	F2			Unicorn
C-56					✓	F2			Unicorn
C-57					✓	F2			Unicorn
C-58					✓	b			Unicorn
C-59					✓	F2			Unicorn
C-60					✓	F2			Unicorn
C-61					✓	F2			Unicorn
C-62					✓	F2			Unicorn
C-63					✓	F2			Unicorn
C-64					✓	F2			Unicorn
C-65					✓	F2			Unicorn
C-66					✓	F2			Unicorn
C-67					✓	F2			Unicorn
C-68					✓	F2			Unicorn
C-69					✓	F2			Unicorn
C-70					✓	F2			Unicorn
C-71					✓	F2			Unicorn
B-1					✓		F2 L		Unicorn
B-2					✓	F2			Unicorn
B-3					✓		F3 L	211; 105, 59	Unicorn
Dlv-1					✓	F2			Unicorn
Lh-1					✓	F2			Unicorn
Pbm-1					✓	F2			Unicorn
Rgr-1					✓	F2			Unicorn
Rgr-3					✓	F2									Unicorn S
					✓	F2									Unicorn S
Jk-2					✓		F2 L		Unicorn
Sktd-1					✓	F2			Unicorn
Pk-1					✓	F2			Unicorn
Ad-1					✓	F2			Unicorn
Ad-2					✓	F2			Unicorn
Ad-3					✓	F2			Unicorn
Ad-4					✓	F2			Unicorn
Ad-5					✓	F2			Unicorn
Blk-1					✓	b			Unicorn
Blk-2					✓	F2			Unicorn
Blk-3					✓	F2			Unicorn
Blk-4					✓	F2			Unicorn
Kd-5					✓	b			Unicorn
Ns-57					✓		F2 L		Unicorn
Ns-61					✓	F2									Unicorn
Nd-1					✓	F2			Unicorn
Nd-2					✓	F2			Unicorn
M-232	✓					F2			Urus
M-233	✓					F2			Urus
M-436	✓			S1		F-									Urus Si
				S2	✓	F2										Unicorn Si
M-451	✓			S1		p									Urus S
				S2												Foreign bird X
M-1077	✓					F2			Urus
M-1078	✓					b			Urus
H-1100	✓					F2									S	Urus S
K-27	✓						F- L		Urus
K-67	✓						F3 L	326; 326							Urus
C-72	✓						F2 L		Urus
B-4	✓						F3 L	162; 53, 342	Urus
B-5	✓						F- L		Urus
Blk-5	✓						F3 L	211; 171	Urus
M-234		✓	P8			F1			Bison
1534	15	14	13	43	1539	1564	21	12	1404	4	4	3	5	2	189	52	2	1	1	2
M-235		✓	P8			F1			Bison
M-236		✓	P8			F1			Bison
M-237		✓	P8			F1			Bison
M-238		✓	P8			F1			Bison
M-239		✓	P8			F1			Bison
M-240		✓	P8			F1			Bison
M-241		✓	P8			F1			Bison
M-242		✓	P8			F1			Bison
M-243		✓	P8			F1			Bison
M-244		✓	P8			F1			Bison
M-245		✓	P8			F1			Bison
M-246		✓	P8			F1			Bison
M-247		✓	P8			F1			Bison
M-248		✓	P8			F1			Bison
M-249		✓	P8			F1			Bison
M-250		✓	P8			F1			Bison
M-251		✓	P8			F1			Bison
M-252		✓	P8			F1			Bison
M-253		✓	P8			F1			Bison
M-254		✓	P8			F1			Bison
M-255		✓	P8			F1			Bison
M-298		✓	P18	U1			F0 L		Joined- Bison-(Unicorn) X
				U2					Fish
M-415		✓				F1			Bison
M-416		✓				F1			Bison
M-477		✓	P8	S1 Register 1		F1									S	Bison X
				S2 Register 2		-										S
	✓			S3 Register 3		F-										Rhino X
M-492		✓	P12	S1		F3		201, 267							S	Bison x 2- facing
		✓	P12	S2		Compound											Snake x 2- facing X
		✓	P11	S3		Compound											Bison attacked- armed human
M-1079		✓	P8			F-			Bison
M-1080		✓	P8			F1			Bison
M-1081		✓	P8			F1			Bison
M-1082		✓	P8			b			Bison
M-1083		✓	P8			F1			Bison
M-1084		✓	P8			F1			Bison
M-1085		✓	P8			F1			Bison
M-1086		✓	P8			F1			Bison
M-1087		✓	P8			F1			Bison
M-1088		✓	P8			F1			Bison
M-1089		✓	P8			F1			Bison
M-1090		✓	P8			F1			Bison
M-1091		✓	P8			F1			Bison
M-1092		✓	P8			F1			Bison
M-1093		✓	P8			F1			Bison
M-1094		✓	P8			F1			Bison
M-1095		✓	P8			F1			Bison
M-1096		✓	P8			F1			Bison
M-1097		✓	P8			F1			Bison
M-1098		✓	P8			b			Bison
M-1099		✓	P8			b			Bison
M-1100		✓	P8			b			Bison
M-1169		✓	P18*			F0			Joined- Bison-(Unicorn-Urus)
M-1170		✓	P18*				F0 L		Joined- Bison-(Urus-Goat) X
M-1171		✓	P18*			F0			Joined- Bison-(Unicorn-Urus) X
M-1202		✓	P8			F1			Bison
M-1206		✓	P8			F-			Bison
M-1225		✓	P8	U1		F1			Bison
				U2		-				Svastika
M-1226		✓	P8			F1			Bison
M-1227		✓	P8				F- L		Bison
M-1367		✓	P12			F3		201, 267	Bison x 2, facing
M-1402			P8	S1		ImF1									S	Bison X
			P15*, P16	S2		F0										Zebu-composite
M-1405			P1, P14	S1											Waving human S
		✓	P8	S2		F1									Bison
	✓			S3		ImF1										Tiger X
	✓			S4		ImF1										Rhino
M-1424		✓	P8	S1		F1									S
		✓	P8	S2		F1										Bison S
M-1430		✓	P11	S1		Compound									Bison attacked- armed human
		✓	P20	S2		-									Tree
			P1, P1, P1	S3		-									3 humans Si
				S4		-										Foot print
		✓	P15*, P16	S5		F0										Zebu-composite Si
		✓	P18*	S6		F0											Joined- Bison-(Rhino?-Urus)
		✓	P6	S7			F1 L										Goat
			P20	S8		-	-										Tree Si
M-1876		✓	P8			F1			Bison
M-1877		✓	P8			F1			Bison
M-1878		✓	P8			F1			Bison
M-1879		✓	P8			F1			Bison
M-1880		✓	P8			F1			Bison
M-1881		✓	P8			F1			Bison
M-1882		✓	P8				F1 L		Bison
M-1883		✓	P8			F1			Bison
M-1884		✓	P8			F1			Bison
M-1885		✓	P8			F1			Bison
M-1886		✓	P8			F1			Bison
M-1887		✓	P8			F1			Bison
M-1888		✓	P8			F1			Bison
M-1889		✓	P8			F1			Bison
M-1890		✓	P8			F1			Bison
M-1891		✓	P8			F1			Bison
M-2014		✓	P8			F1									Bison
M-2021		✓	P8	S1		ImF1									Tiger Si
			P14	S2											Human- waving left
	✓			S3		ImF1										Gharial Si
				S4	✓	ImF2										Unicorn
H-76		✓	P8			F1			Bison
H-77		✓	P8			F1			Bison
H-78		✓	P8			F1			Bison
H-79		✓	P8			F1			Bison
H-80		✓	P8			F1			Bison
H-81		✓	P8			F1			Bison
H-82		✓	P8			F1			Bison
H-176			P20	S1											Temple S
			P1	S2		-									Standing deity
				S3		-									Trident post
		✓	P8	S4		ImF1									Bison
			P7	S5		ImF1										Turning goat X
	✓			S6		-										Hare
				S7		-										Animal x
			P5	S8		-										Yogi/ni
			P7	S9		ImF1										Turning tiger
			P3	S10		-										Kneeling human on tree
			P20	S11		-										Tree
H-576		✓	P8			b			Bison
H-577		✓	P8			F1			Bison
H-578		✓	P8			b			Bison
H-579		✓	P8			b			Bison
H-580		✓	P8			F1			Bison
H-581		✓	P8			b			Bison
H-582		✓	P8			b			Bison
H-583		✓	P8			F1			Bison
H-584		✓	P8			F1			Bison
H-698		✓	P8			F1									S	Bison X
H-716		✓	P8	S1			F1 L								Bison
			P3	S2			b, Compound L									Kneeling human on tree
			P20	S3												Tree
H-830		✓	P8												Bison?
H-858			P4	S1		Compound									Yogi/ni S Cross-legged human X
			P11	S2		Compound										Bison negotiated- Unarmed human X
			P1	S3													Standing deity X
H-1770		✓	P8			F1									S	Bison X
H-1934			P4	S1		Compound									S	Yogi/ni + Cross-legged human X
			P11	S2		Compound											Bison negotiated- Unarmed human X
H-1935			P4	S1		Compound									S	Yogi/ni + Cross-legged human
			P11	S2		Compound											Bison negotiated- Unarmed human
H-1966			P8, P8			F1, F1									S	Bison x 2- trailing
H-1969			P8			b									S	Bison
H-1997			P12	S1		Compound									S	Bison x 2- facing
			P20	S2												Tree
H-1999		✓	P8	S1		F1									Bison S
				S2												Tree X
H-2002			P7	S1		Compound									Turning tiger
			P3	S2											Kneeling human on tree
			P20	S3											Tree
H-2004				S1											?
			P11	S2		Compound									Bison attacked- armed human
H-2023			P1	S1											Standing deity X
			P3	S2		Compound										Yogi/ni + Cross-legged human X
			P11	S3		Compound											Bison negotiated- Unarmed human X
H-2024			P3	S1		Compound									S	Yogi/ni + Cross-legged human X
			P11	S2		Compound											Bison negotiated- Unarmed human X
H-2025															?
																?
						Compound											Bison negotiated- Unarmed human
			P11	S1		Compound											Bison negotiated- Unarmed human X
H-2026			P3	S1		Compound									S	Yogi/ni + Cross-legged human X
			P11	S2		Compound											Bison negotiated- Unarmed human X
				S3														Standing deity X
H-2027			P3	S1		Compound									S	Yogi/ni + Cross-legged human X
			P11	S2		Compound											Bison negotiated- Unarmed human X
			P1	S3														Standing deity X
H-2028			P3	S1		Compound									S	Yogi/ni + Cross-legged human X
			P11	S2		Compound											Bison negotiated- Unarmed human X
			P1	S3														Standing deity X
H-2029			P3	S1		Compound									S	Yogi/ni + Cross-legged human X
			P11	S2		Compound											Bison negotiated- Unarmed human X
			P1	S3														Standing deity X
H-2030			P3	S1											S	? X
			P11	S2		Compound											Bison negotiated- Unarmed human X
			P1	S3														Standing deity X
H-2031			P3	S1		Compound									S	Yogi/ni + Cross-legged human X
			P11	S2		Compound											Bison negotiated- Unarmed human X
			P1	S3														Standing deity X
L-45		✓	P8			F1			Bison
L-46		✓	P8			F1			Bison
L-47		✓	P8			F1			Bison
K-28		✓	P8			F-			Bison
K-29		✓	P8			F1			Bison
K-30		✓	P8			F1			Bison
K-42			P18*			F0			Joined- Bison-(b-b)
K-43			P18*				F0 L		Joined- Bison-(Unicorn-Urus)
K-150		✓	P8				F- L		Bison
C-22		✓	P8			F1			Bison
C-73		✓	P8			F1			Bison
C-74			P8			F1			Bison
Ai-6			P18*				F0 L		Joined- Bison-(Unicorn-Urus)
Ns-58		✓	P8				F1 L		Bison
M-256	✓					b			Zebu
M-257	✓					F0			Zebu
M-258	✓					F0			Zebu
M-259	✓					F0			Zebu
M-260	✓					F0			Zebu
M-261	✓					F0			Zebu
M-262	✓					F0			Zebu
M-263	✓					F0			Zebu
M-264	✓					F0			Zebu
M-265	✓					F0			Zebu
M-318	✓					F0			Zebu
M-328	✓					F0			Zebu
M-437	✓					F0									Zebu
M-1101	✓					b			Zebu
M-1102	✓					F0			Zebu
M-1103	✓					F0			Zebu
M-1104	✓					b			Zebu
M-1105	✓					F3		393	Zebu
M-1106	✓					b			Zebu
M-1107	✓					F0			Zebu
M-1108	✓					F0			Zebu
M-1109	✓					b			Zebu
M-1110	✓					b			Zebu
M-1111	✓					F0			Zebu
M-1112	✓					b			Zebu
M-1113	✓					F0			Zebu
M-1114	✓					F0			Zebu
M-1115	✓					b			Zebu
M-1116	✓					F0			Zebu
M-1117	✓					F0			Zebu
M-1118	✓					F0			Zebu
M-1119	✓					F0			Zebu
M-1120	✓					F0			Zebu
M–1121	✓					F0			Zebu
M-1122	✓					b			Zebu
M-1123	✓					F0			Zebu
M-1892	✓					b			Zebu
M-1893	✓					F0			Zebu
M-1894	✓					F0			Zebu
M-1895	✓					b			Zebu
M-1896	✓					F0			Zebu
M-1897	✓					F0			Zebu
M-1898	✓					F0			Zebu
M-1899	✓					F0			Zebu
M-1900	✓					F0			Zebu
M-1901	✓					F0			Zebu
M-1902	✓					F0			Zebu
M-1927	✓					F0			Zebu
H-83	✓					F0			Zebu
H-84	✓					F0			Zebu
H-85	✓					b			Zebu
H-86	✓					F0			Zebu
H-171	✓						F0 L								S	Zebu X
H-585	✓					F0			Zebu
H-586	✓					b			Zebu
H-587	✓					b			Zebu
H-588	✓					b			Zebu
H-699	✓						F0 L								S	Zebu X
H-700	✓						F0 L								S	Zebu X
H-1767	✓					F0									S	Zebu X
H-1953	✓			S1		F0									S	Zebu S
				S2												Fish
K-32	✓					F0			Zebu
K-66	✓					F0									Zebu
Ns-59	✓					F0			Zebu
M-266		✓	P9			F1			Buffalo
M-267		✓	P9			F1			Buffalo
M-268		✓	P9			F1			Buffalo
M-269		✓	P9				F- L		Buffalo
M-270		✓	P9				F- L		Buffalo
M-304			P5, P18	U6					Yogi/ni, four heads
		✓	P11	U1		ImF1			Buffalo
				U2		ImF1			Rhino
			P1	U3		ImF1			Elephant, face away
	✓			U4					Human
		✓	P9	U5		ImF1			Tiger
			P13	U7		ImF1			Goat x 2 face away
M-312			P11	U1			Compound L		Buffalo tossing humans X
			P11	U2					Humans attacked
M-1124		✓	P9			F1			Buffalo
M-1125		✓	P9			b			Buffalo
M-1126		✓	P9			F1			Buffalo
M-1127		✓	P9			F1			Buffalo
M-1128		✓	P9			b			Buffalo
M-1903		✓	P9			F1			Buffalo
M-1918		✓	P9				F3 L	242; b, 1, 162	Buffalo
M-1928		✓	P9			F1			Buffalo
M-2022			P11	S1		Compound									Buffalo tossing human X
			P11	S2											Human attacked
			P1	S3											Deity
			S20	S4											Tree
				S5												Basket weave pattern X
H-87		✓	P9			b			Buffalo
H-589		✓	P9			b			Buffalo
K-33		✓	P9			F1			Buffalo
C-76		✓	P10	U1		Compound			Buffalo in intercourse
				U2					Unicorn woman
B-6		✓	P9				F1 L		Buffalo?
B-7		✓	P9				F1 L		Buffalo
M-271		✓	P7			F0			Turning Markhor X
M-1129	✓						F3 L	214, 342; 293, ?, 342, 175	Markhor
K-35	✓					F0			Markhor
K-151	✓					F0			Markhor
K-34	✓						F3 L	59	Markhor
B-8	✓						F0 L		Markhor
B-9	✓						F0 L		Markhor
B-10	✓						F3 L	162; 112	Markhor
B-11	✓					F3		171	Markhor
B-23				S1											Fish
	✓			S2			F0 L								Markhor
				S3	✓		ImF2 L								Unicorn
			P1, P9	S4											Human- waving left
M-272		✓	P7				F3 L	284, 99	Turning Goat
M-273	✓	✓					F- L		Goat
M-438		✓	P7				ImF1 L								Turning Goat X
M-1904	✓					F3		162; 109	Goat
M-1905	✓					F3		211; ?	Goat
H-701	✓														S	Goat
H-702		✓	P7			ImF1, ImF1									Turning Goat S	Turning Goat S
H-703	✓					b									S	Goat
H-1768	✓					ImF1									S	Turning Goat S
H-1771	✓														S	Goat
H-1772	✓														S	Goat
H-1773	✓														S	Goat
L-48	✓					F2			Goat
K-37	✓					F3		59	Goat
K-76				S1											Tree X
				S2		F1									Goat
K-151		✓	P7				ImF1 L		Turning Goat X
C-23	✓						F3 L	29, 267; + 8 signs	Goat
B-12	✓						F3 L	112; 167	Goat
B-13		✓	P7				b		Turning Goat
B-14	✓						F3 L	59	Goat?
M-274	✓					F1			Rhino
M-275	✓					F1			Rhino
M-276	✓					F1			Rhino
M-277	✓					F1			Rhino
M-446i	✓					F1, F1									Rhino X	Rhino X
M-447i	✓					F1, F1									Rhino X	Rhino X
M-448	✓			S1		ImF1									Bison?
	✓			S2		ImF1									Rhino X
M-1131	✓					b			Rhino
M-1132	✓					b			Rhino
M-1133	✓					F2			Rhino
M-1134	✓					F-			Rhino
M-1135	✓					F2			Rhino
M-1136	✓					F1			Rhino
M-1137	✓					b			Rhino
M-1138	✓					F1			Rhino
M-1139	✓						b L		Rhino
M-1140	✓					b			Rhino
M-1906	✓					F1			Rhino
M-1907	✓					F1			Rhino
M-1908		✓				F3		86; 347, 342	Rhino, dot in circle
M-1909	✓					F-			Rhino
M-1910	✓					F1			Rhino
M-1911	✓						F- L		Rhino
M-2013	✓					F1			Rhino
M-2014	✓					F1			Rhino
M-2017i	✓					F1, F1									Rhino X	Rhino X
M-2018i	✓					F1, F1									Rhino X	Rhino X
M-2019i	✓					F1, F1									Rhino X	Rhino X
H-88	✓					F1			Rhino
H-845	✓			S1			b L								S	Rhino X
				S2													Tree X
H-1955i	✓					F1, F1									Rhino X	Rhino X
K-39	✓					F3		402	Rhino
B-15	✓						b L		Rhino
B-16	✓						b L		Rhino
Ad-6	✓					F1			Rhino
M-278	✓					F-			Elephant
M-279	✓					F-			Elephant
M-280	✓					F-			Elephant
M-281	✓					F-			Elephant
M-282	✓					F-			Elephant
M-283	✓					F-			Elephant
M-284	✓					F-			Elephant
M-285	✓					F-			Elephant
M-286	✓					F-			Elephant
M-1141	✓					b			Elephant
M-1142	✓					F-			Elephant
M-1143	✓					b			Elephant
M-1144	✓					b			Elephant
M-1145	✓					F-			Elephant
M-1146	✓					b			Elephant
M-1147	✓					F-			Elephant
M-1148	✓					F-			Elephant
M-1149	✓					b			Elephant
M-1150	✓					F-			Elephant
M-1151	✓					F-			Elephant
M-1152	✓					F1			Elephant
M-1153	✓					b			Elephant
M-1154	✓					b			Elephant
M-1155	✓					F-			Elephant
M-1156	✓					F-			Elephant
M-1157	✓					F-			Elephant
M-1158	✓					F-			Elephant
M-1159	✓					F-			Elephant
M-1160	✓					F-			Elephant
M-1161	✓					F-			Elephant
M-1162	✓					F-			Elephant
M-1390	✓			S1		F-									Elephant S
				S2												Foreign bird X
[truncated: 382 more rows]
